# Supplementary material
Source: ML conference proceedings conference paper supplement (https://openreview.net/forum?id=a-bD9-0ycs0)

Relative Magnitude change  $\hat{x}_t \rightarrow \hat{x}_{t+1}$ 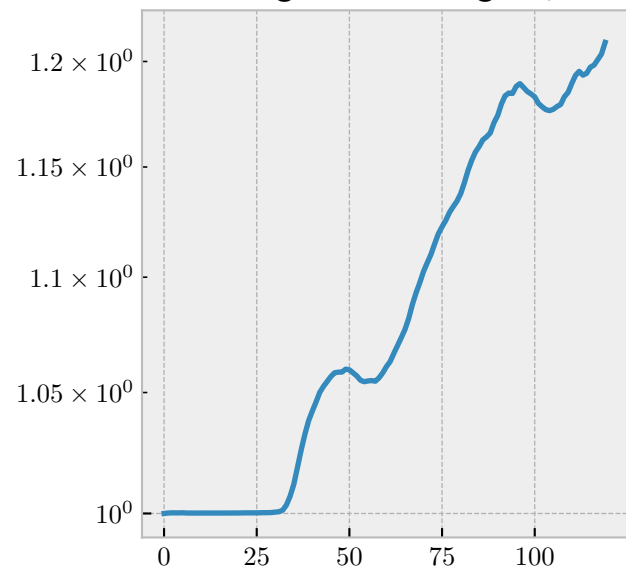Relative Magnitude change  $\hat{x}'_t \rightarrow \hat{x}'_{t+1}$ 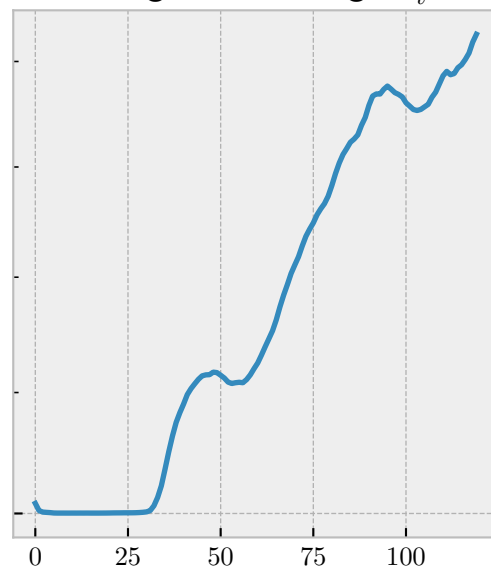Relative Magnitude change  $\hat{z}_t \rightarrow \hat{z}_{t+1}$ 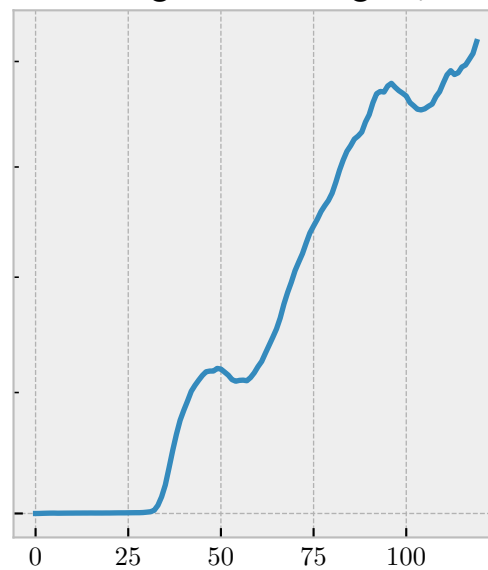Relative Magnitude change  $\hat{z}'_t \rightarrow \hat{z}'_{t+1}$ 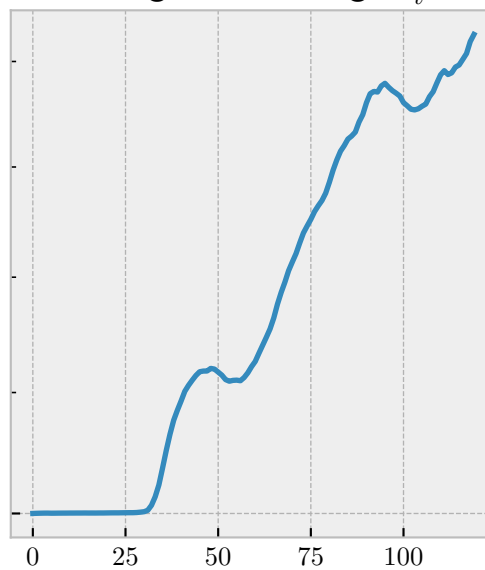Relative magnitude change  $\hat{z}_t \rightarrow \hat{x}_t$ 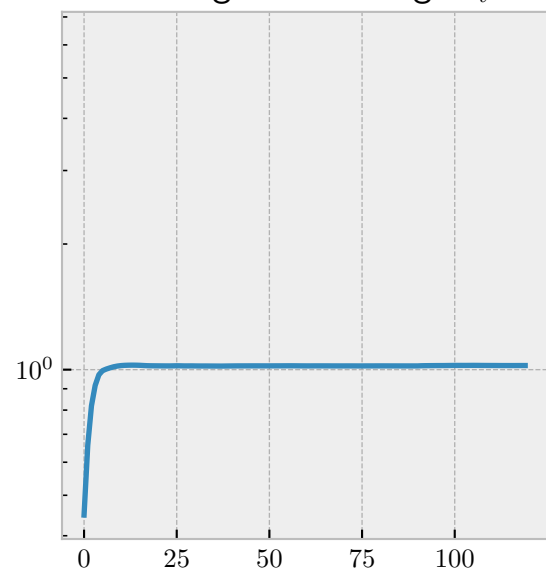Relative magnitude change  $\hat{x}_t \rightarrow \hat{x}'_t$ 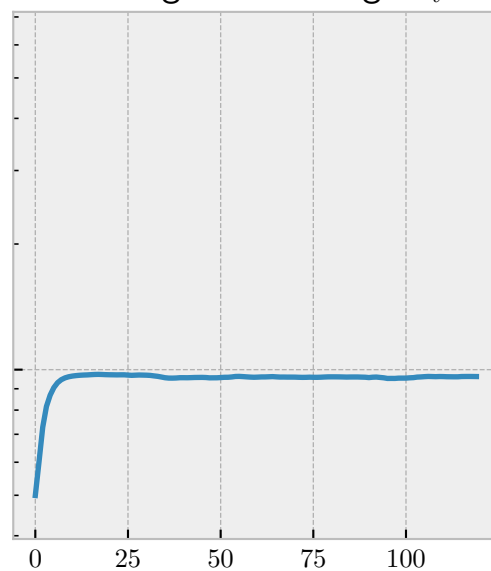Relative magnitude change  $\hat{x}'_t \rightarrow \hat{z}'_t$ 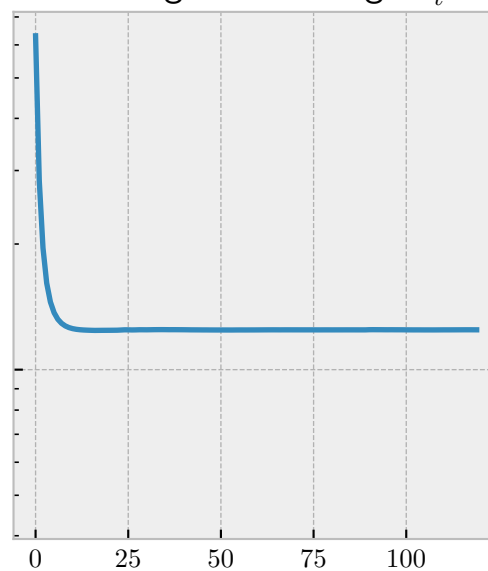Relative magnitude change  $\hat{z}'_t \rightarrow \hat{z}_{t+1}$ 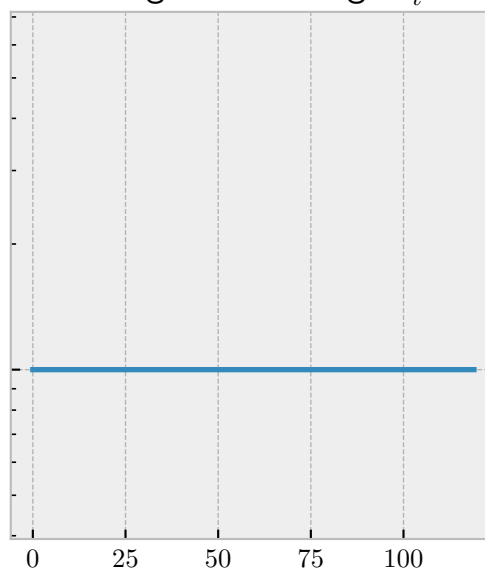

Supplement: supplementary_material [file attachment]
