# Supplementary material
Source: ML conference proceedings conference paper supplement (https://openreview.net/forum?id=a-bD9-0ycs0)
Supplement: supplementary_material [file attachment]

Difference  $x^{(\text{LinODE})}$  and  $x^{(\text{odeint})} - 1000$  random systems

FP32

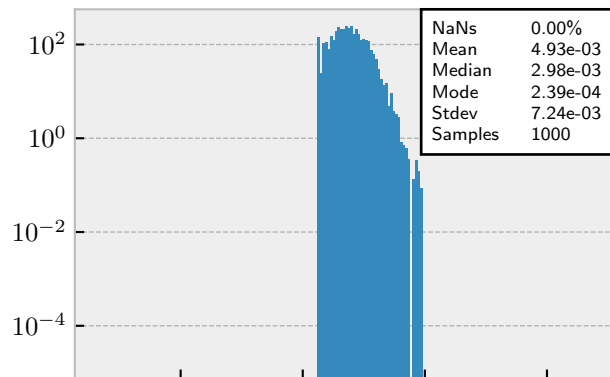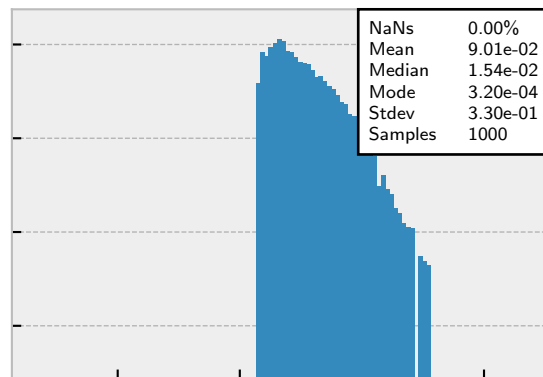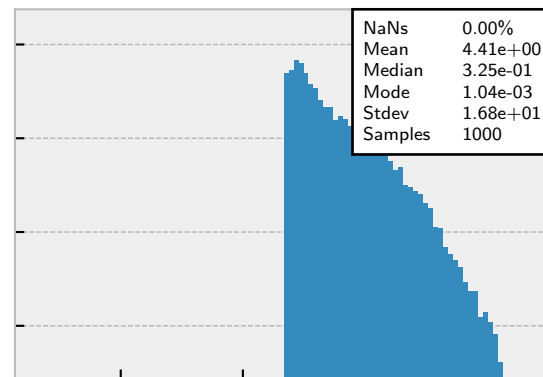

FP64

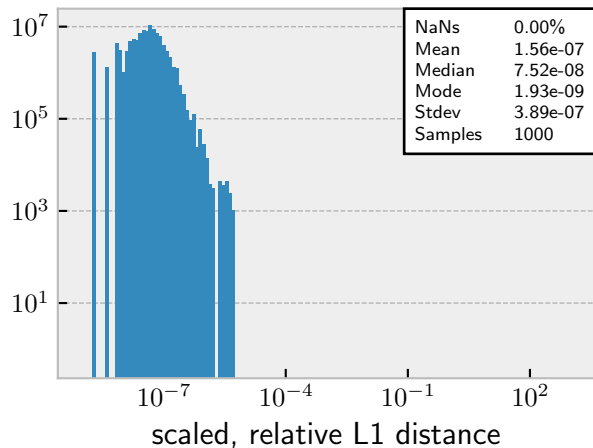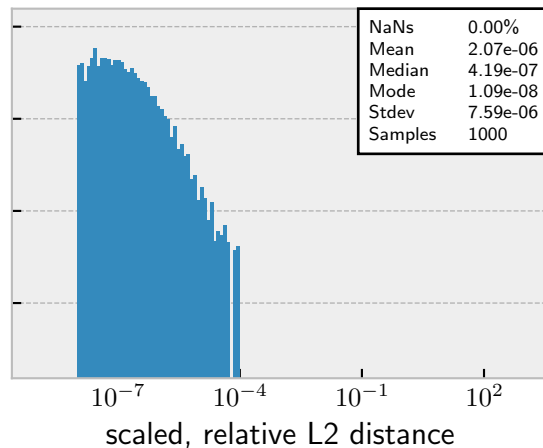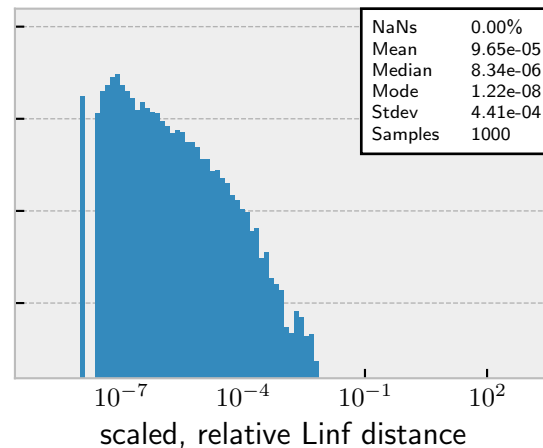

scaled, relative L1 distance

scaled, relative L2 distance

scaled, relative Linf distance
