# Supplementary material
Source: ML conference proceedings conference paper supplement (https://openreview.net/forum?id=a-bD9-0ycs0)

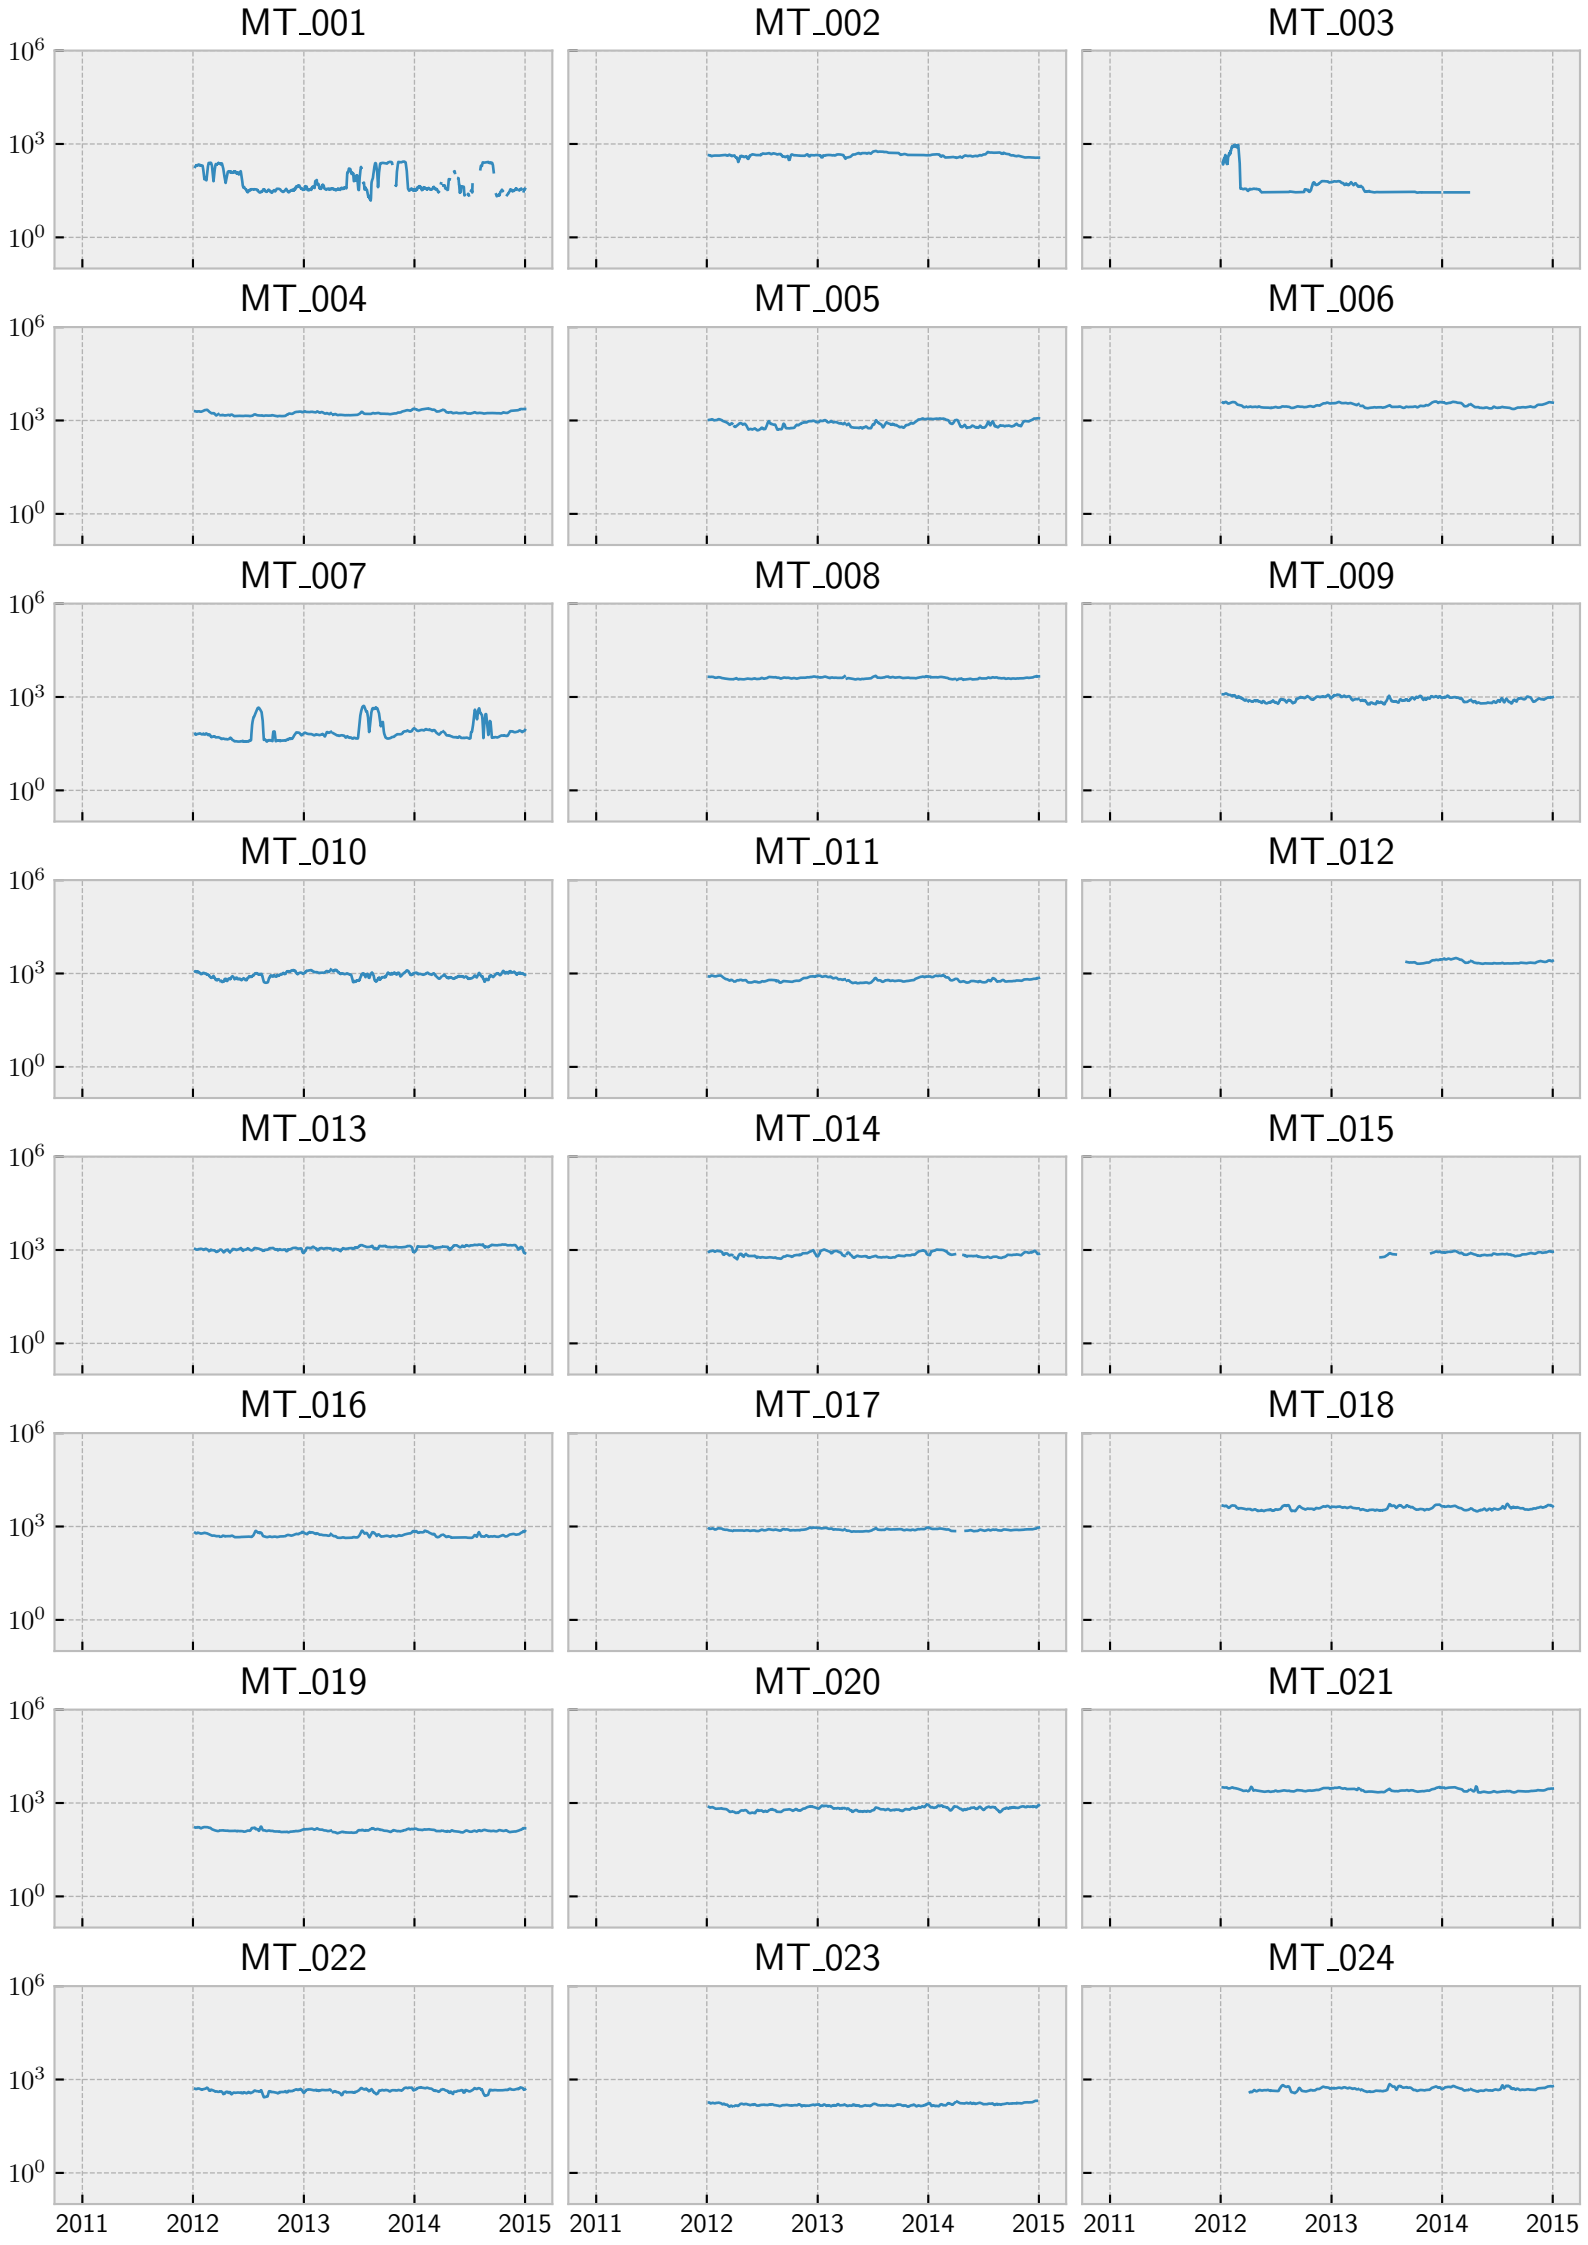

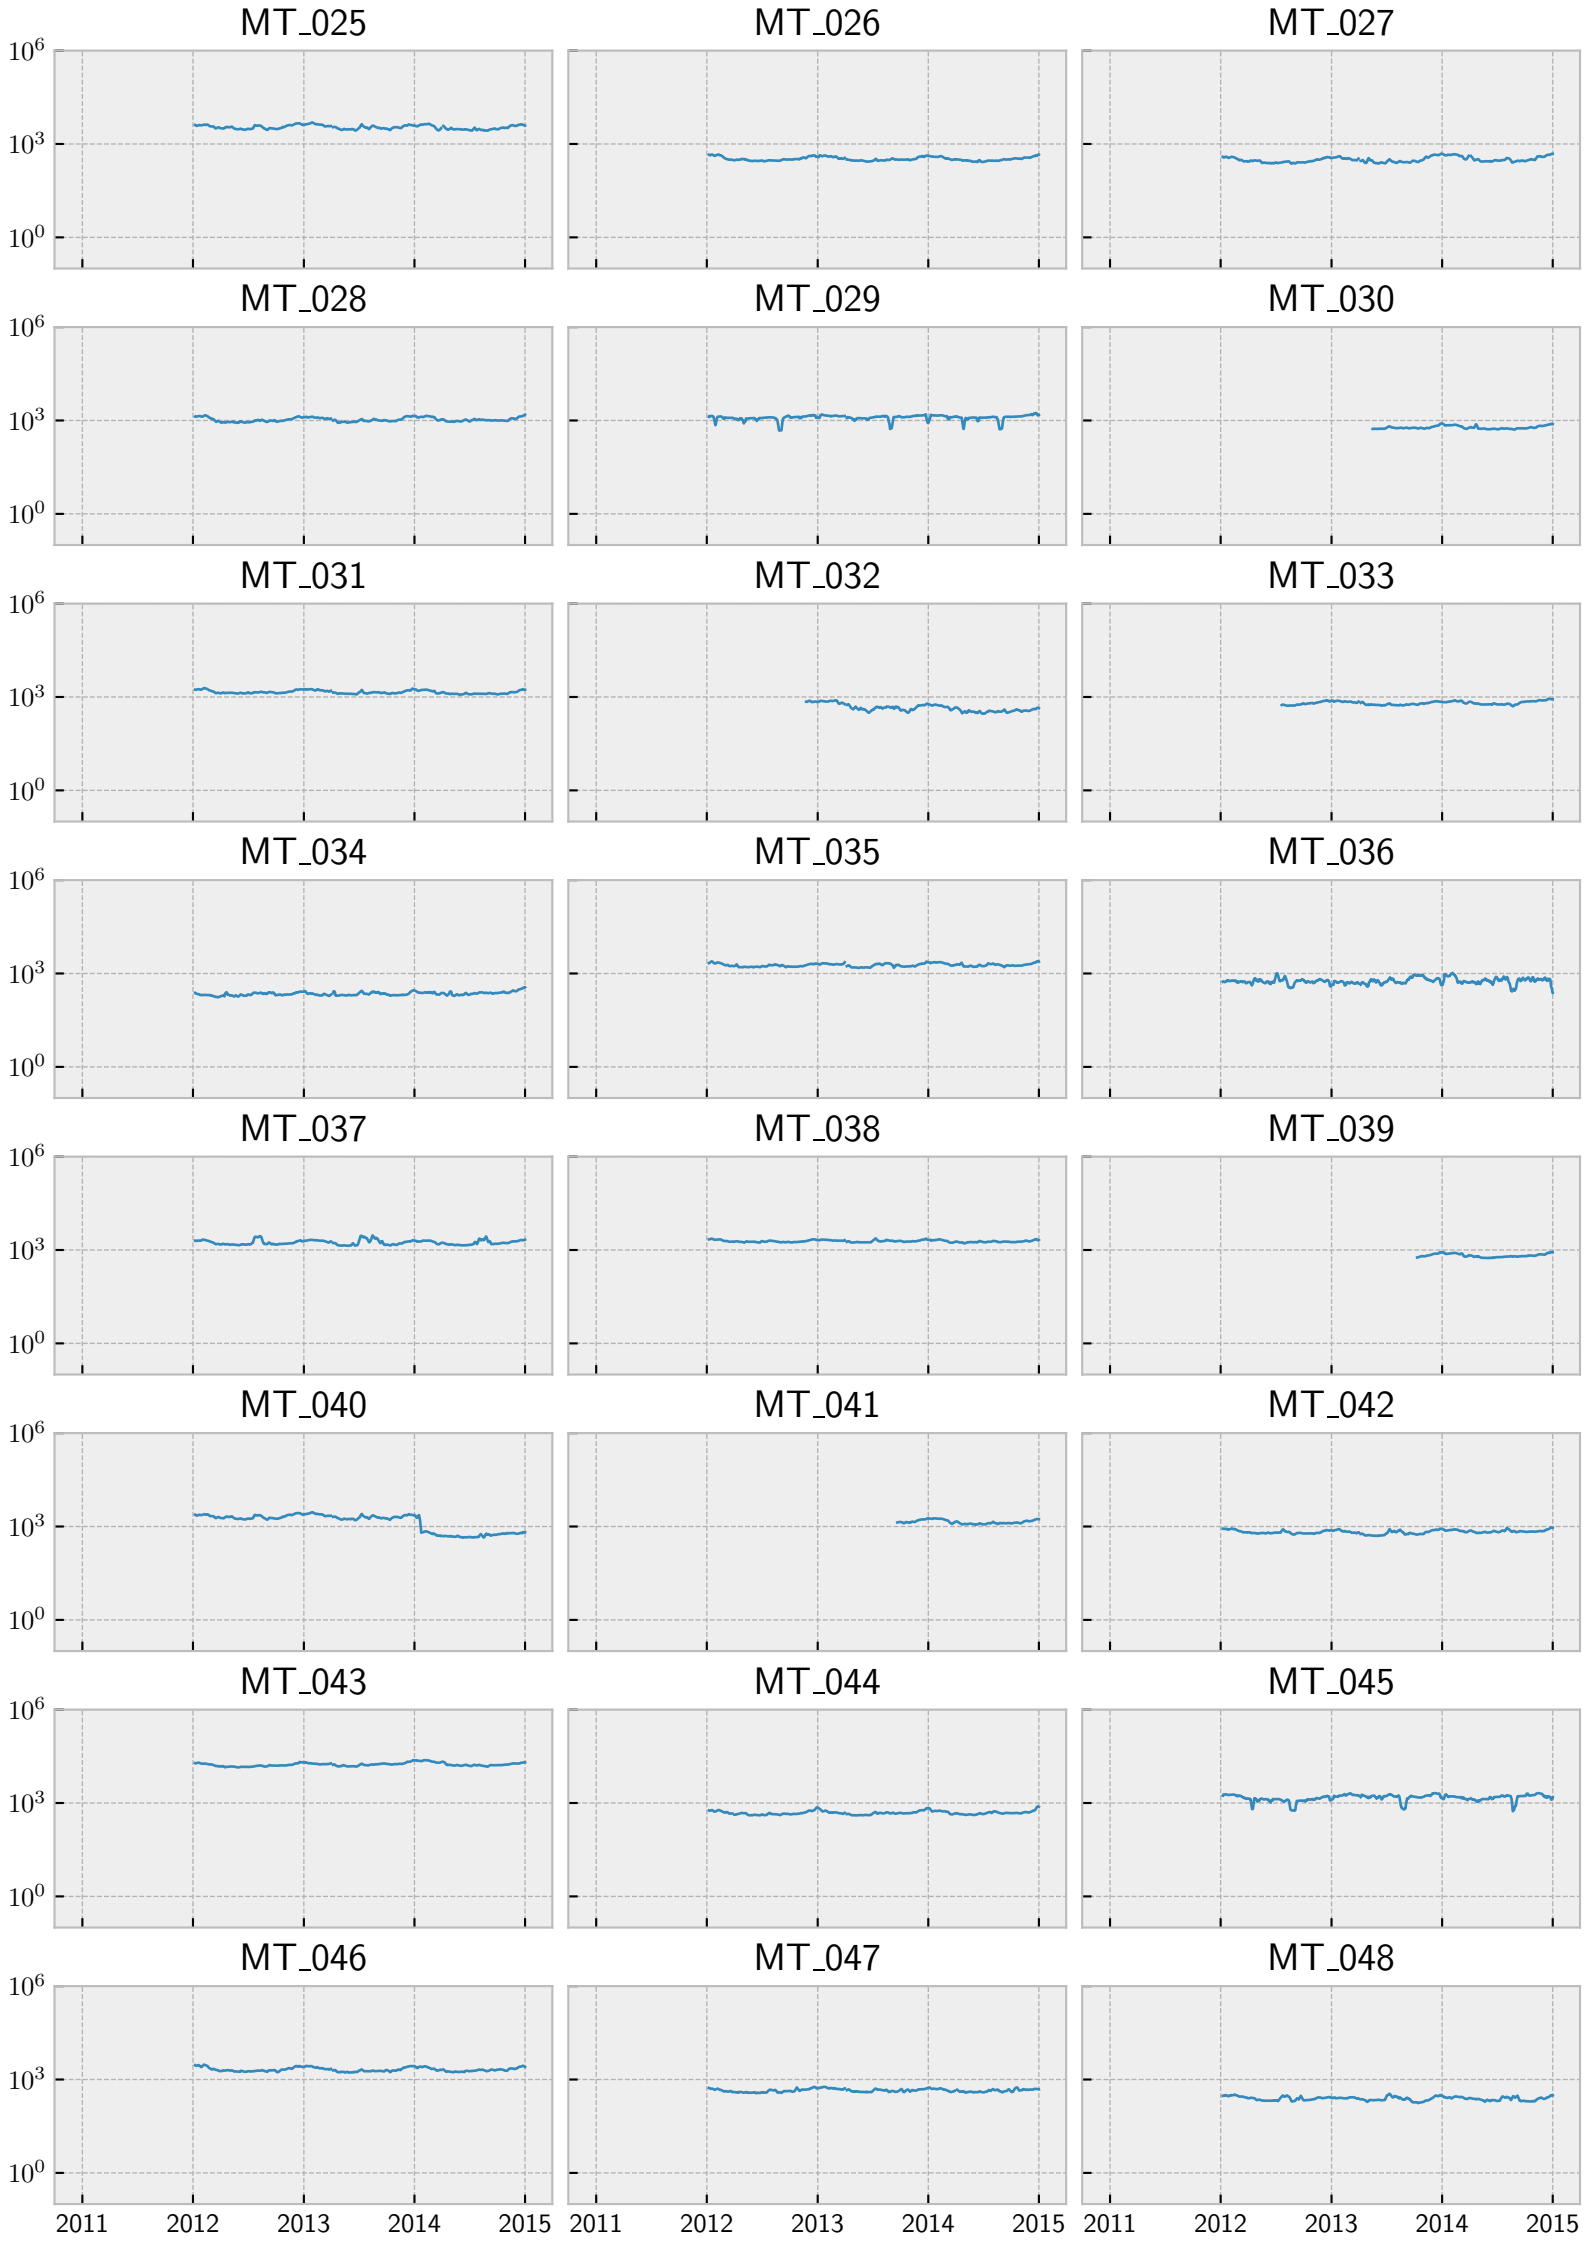

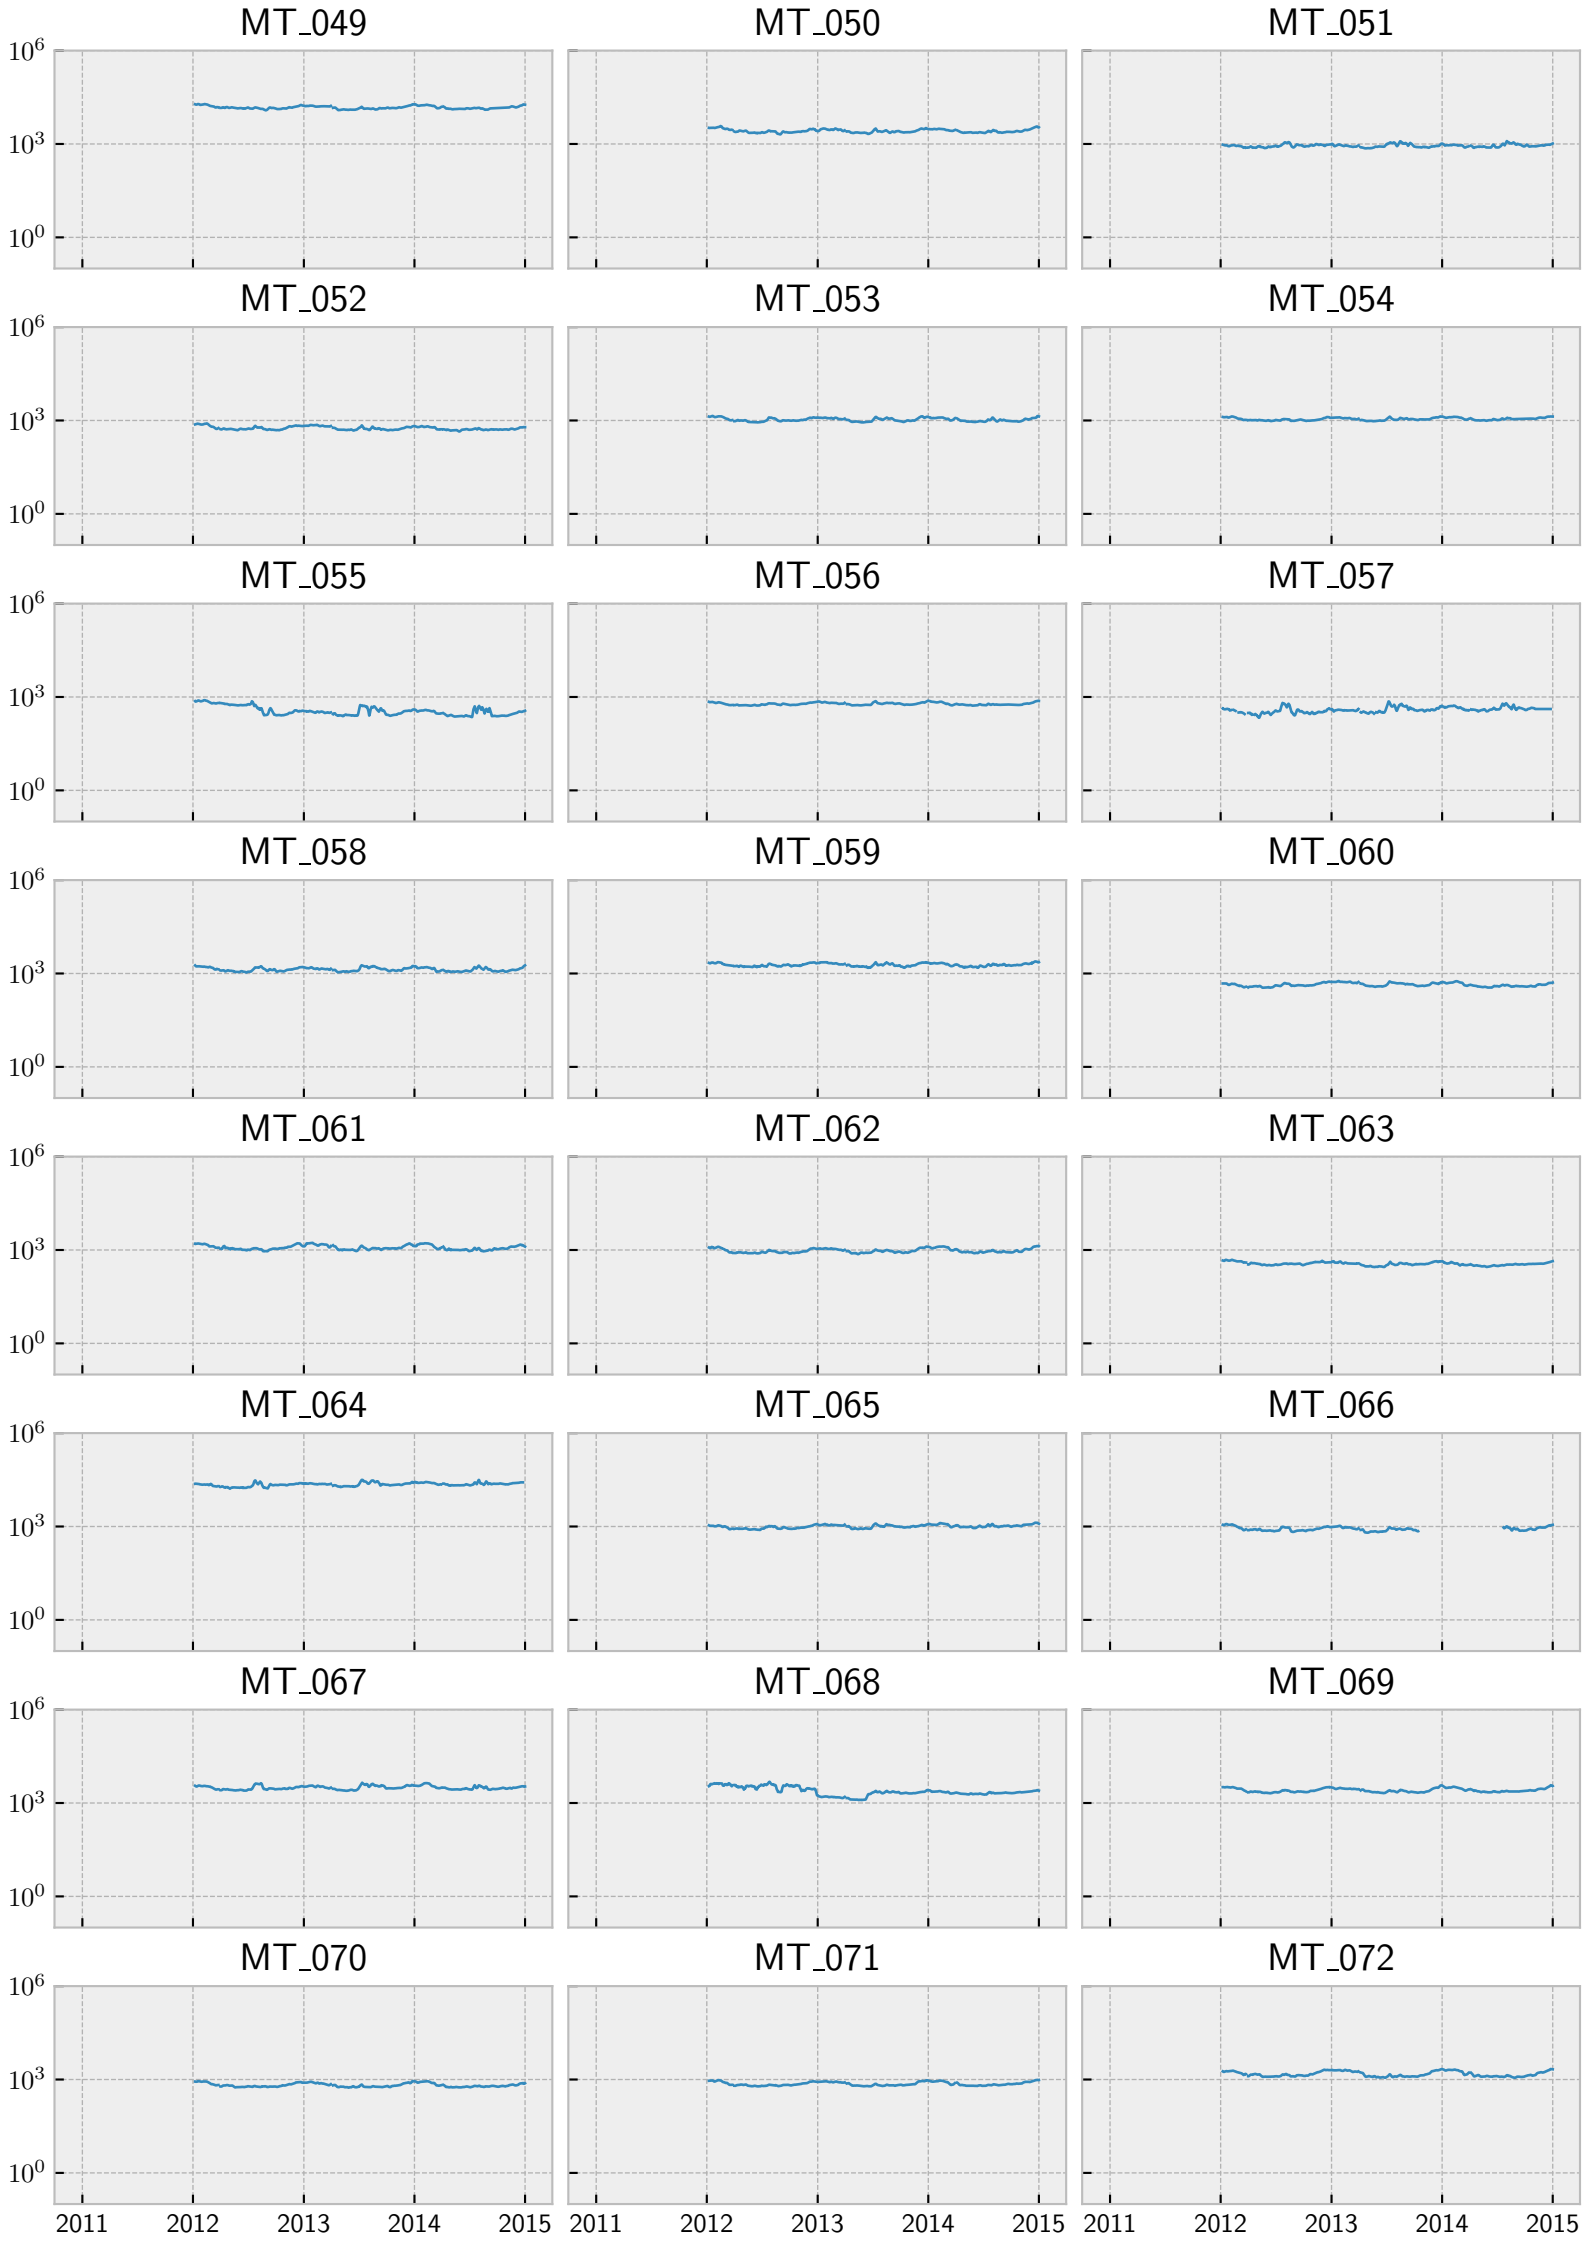

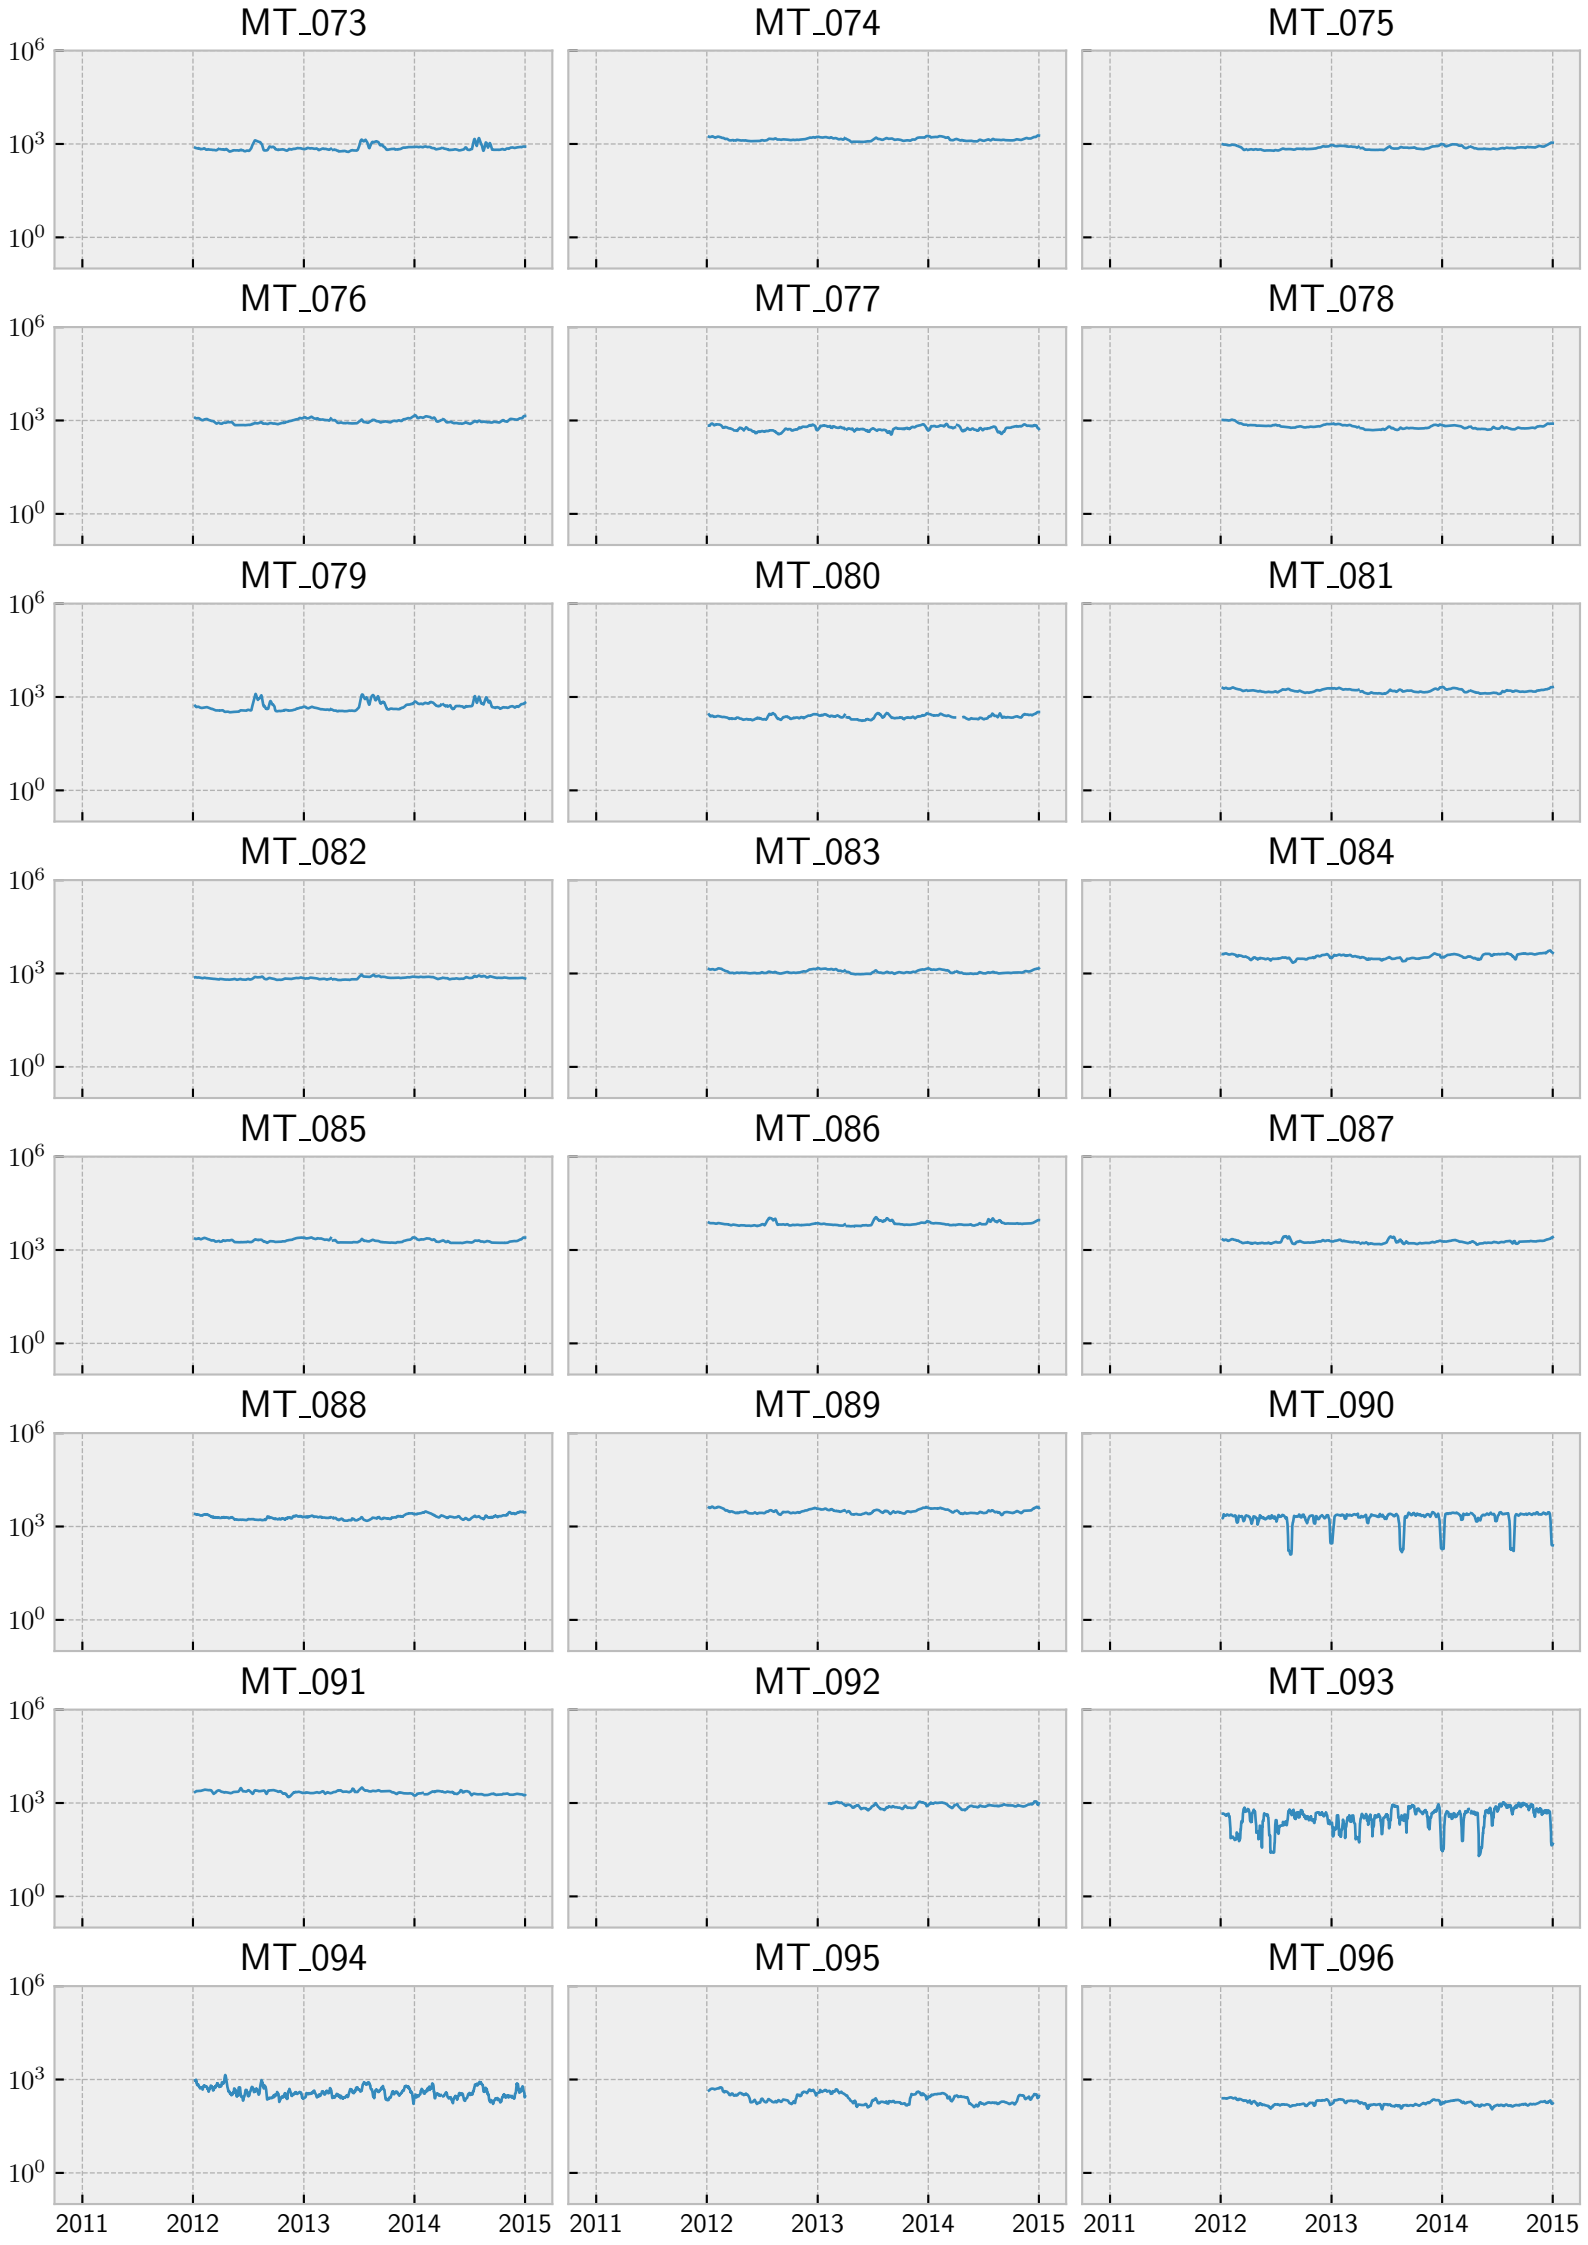

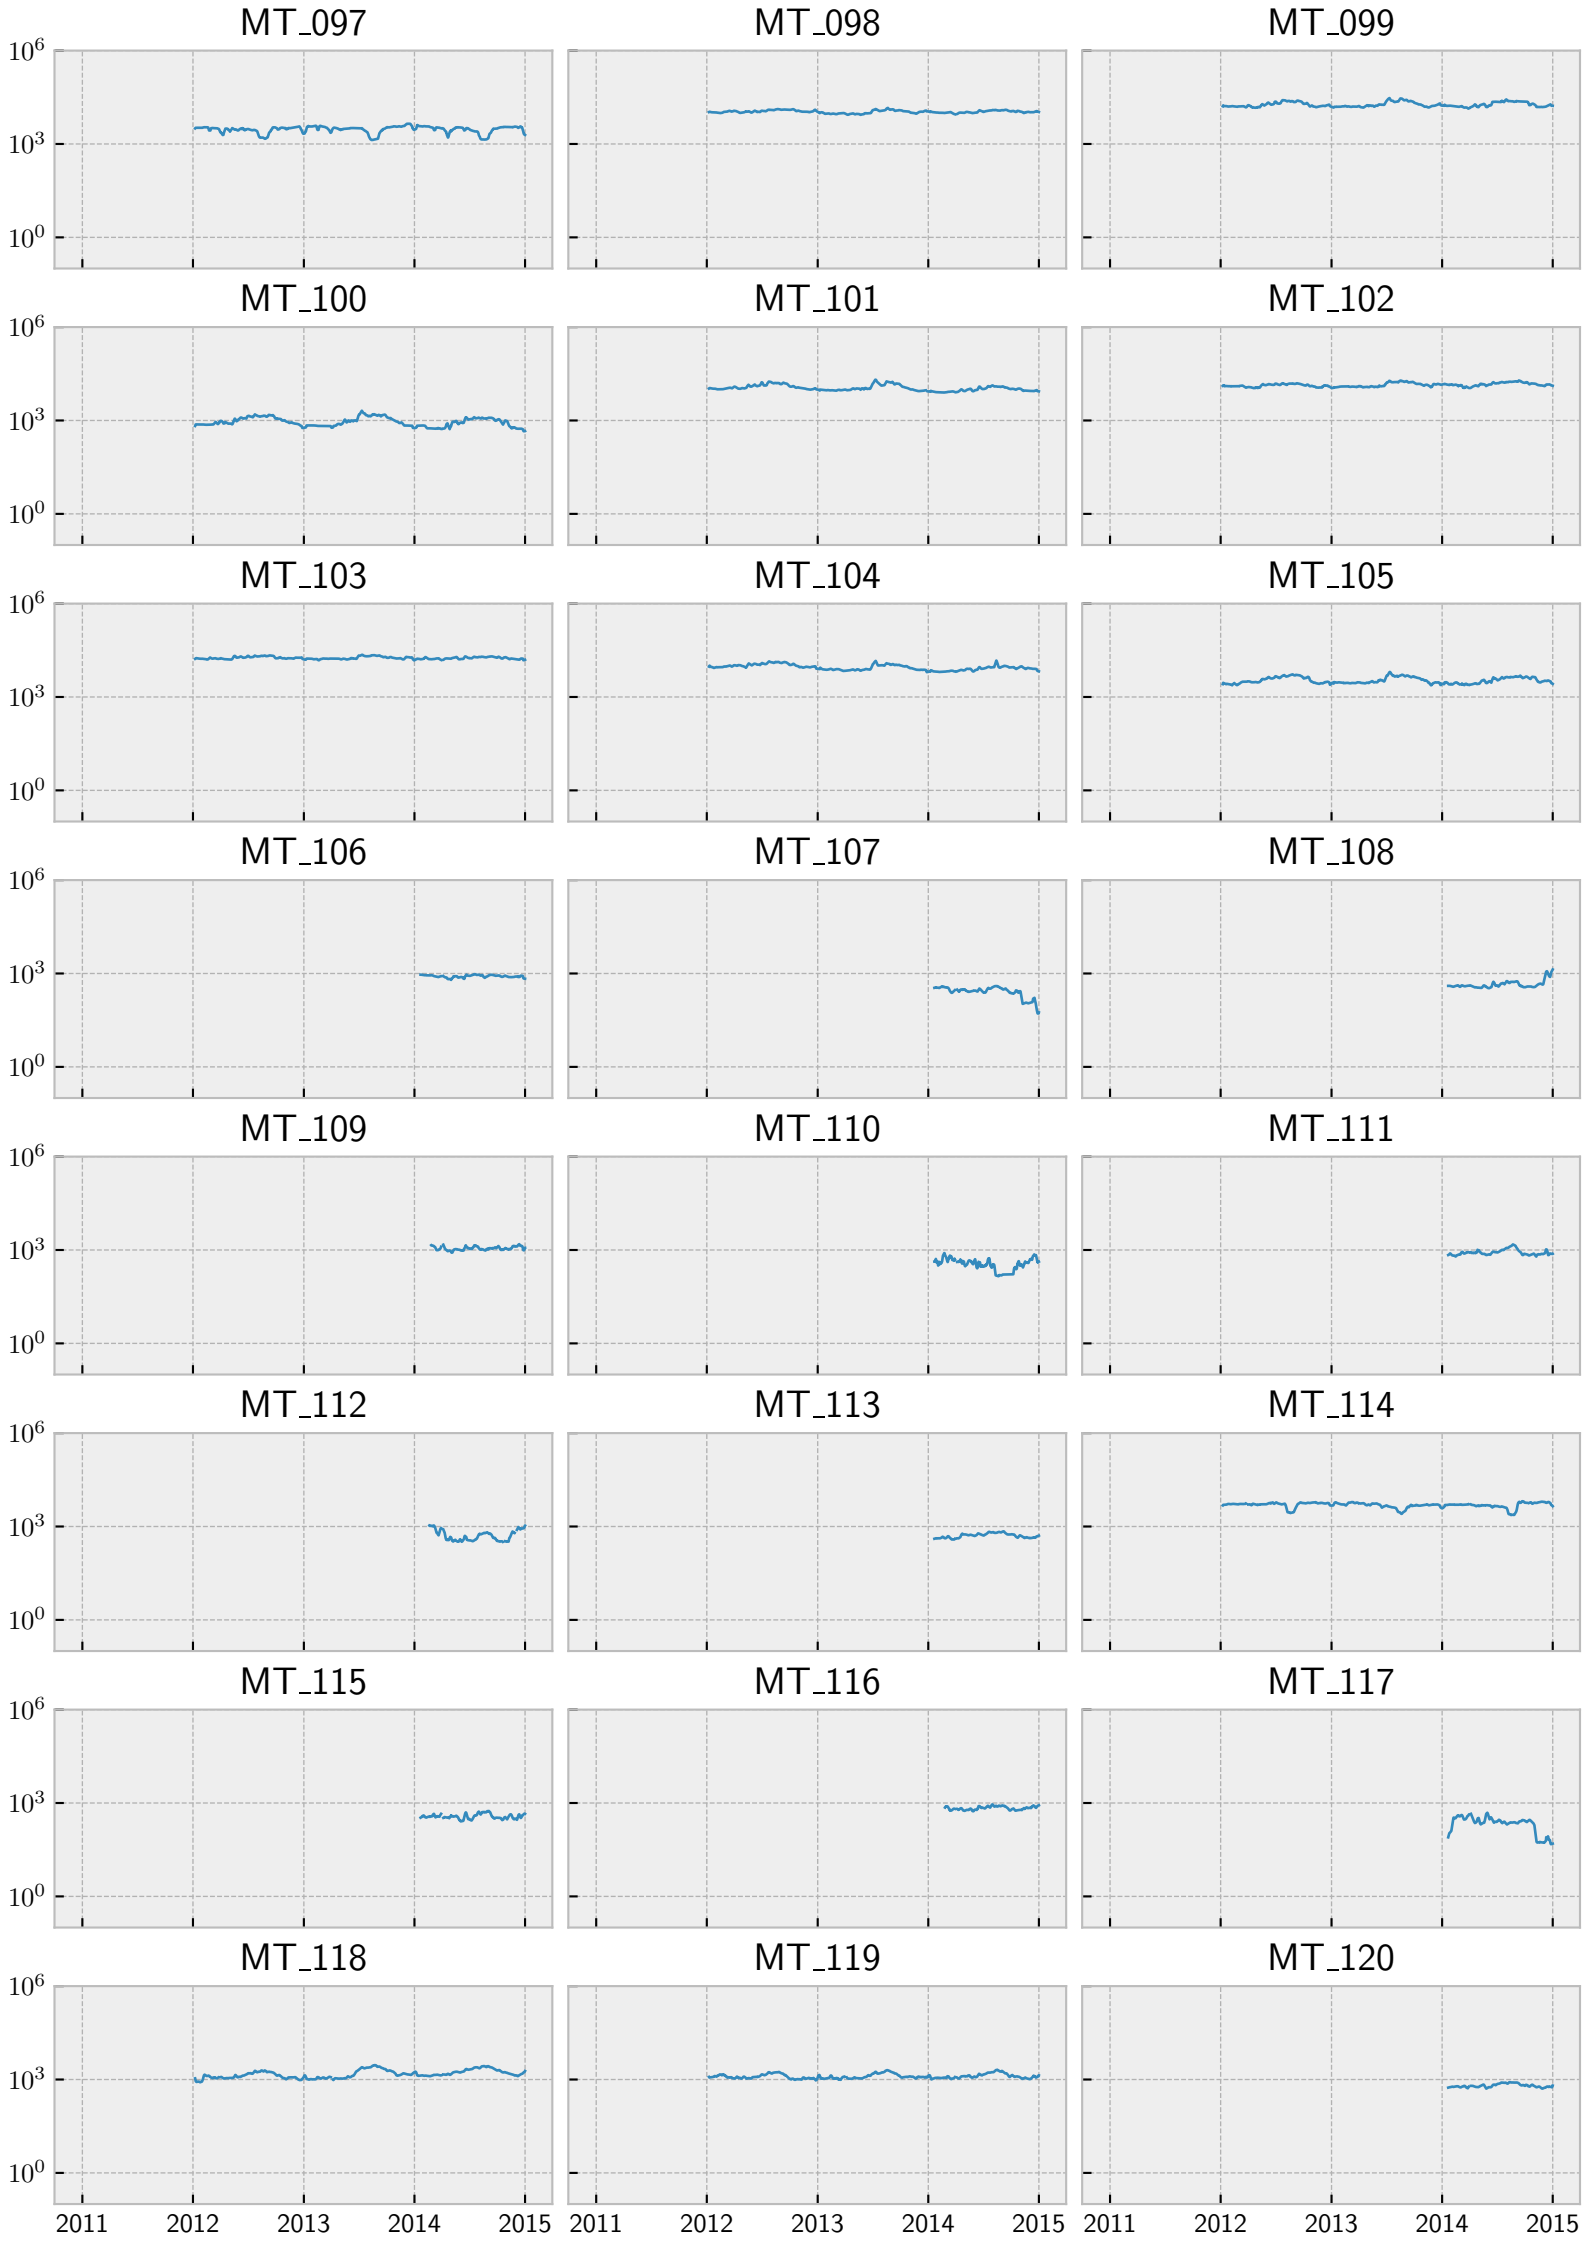

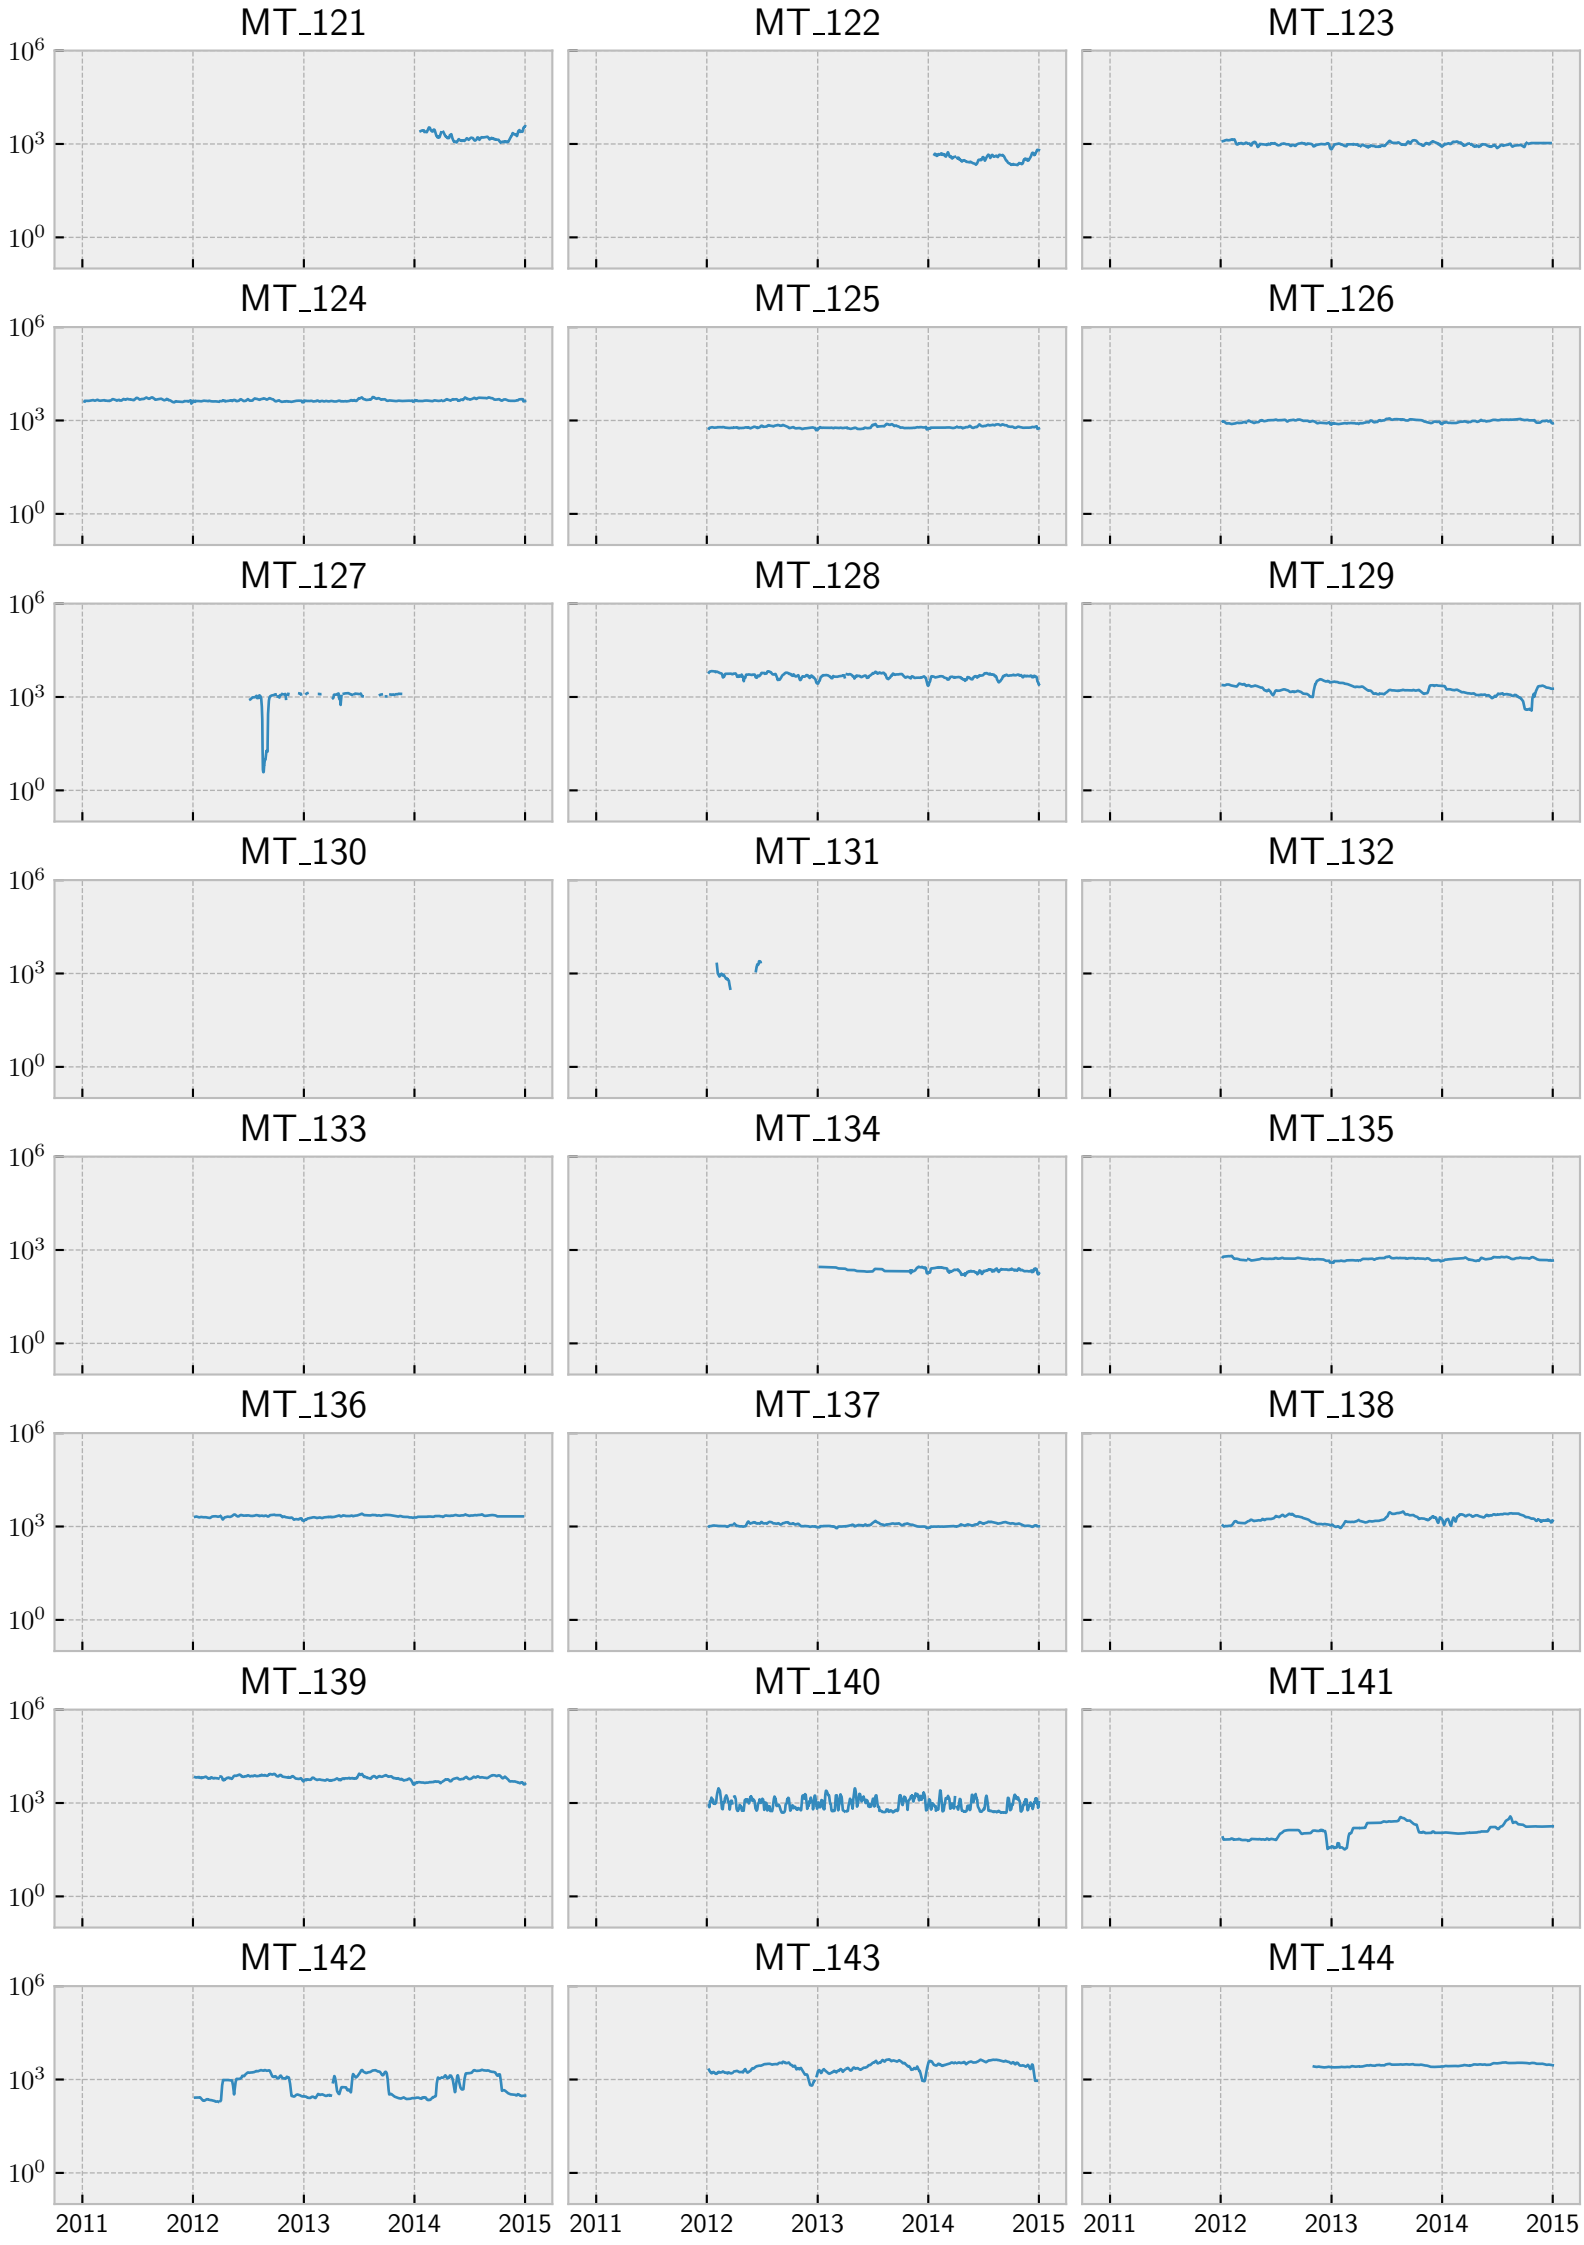

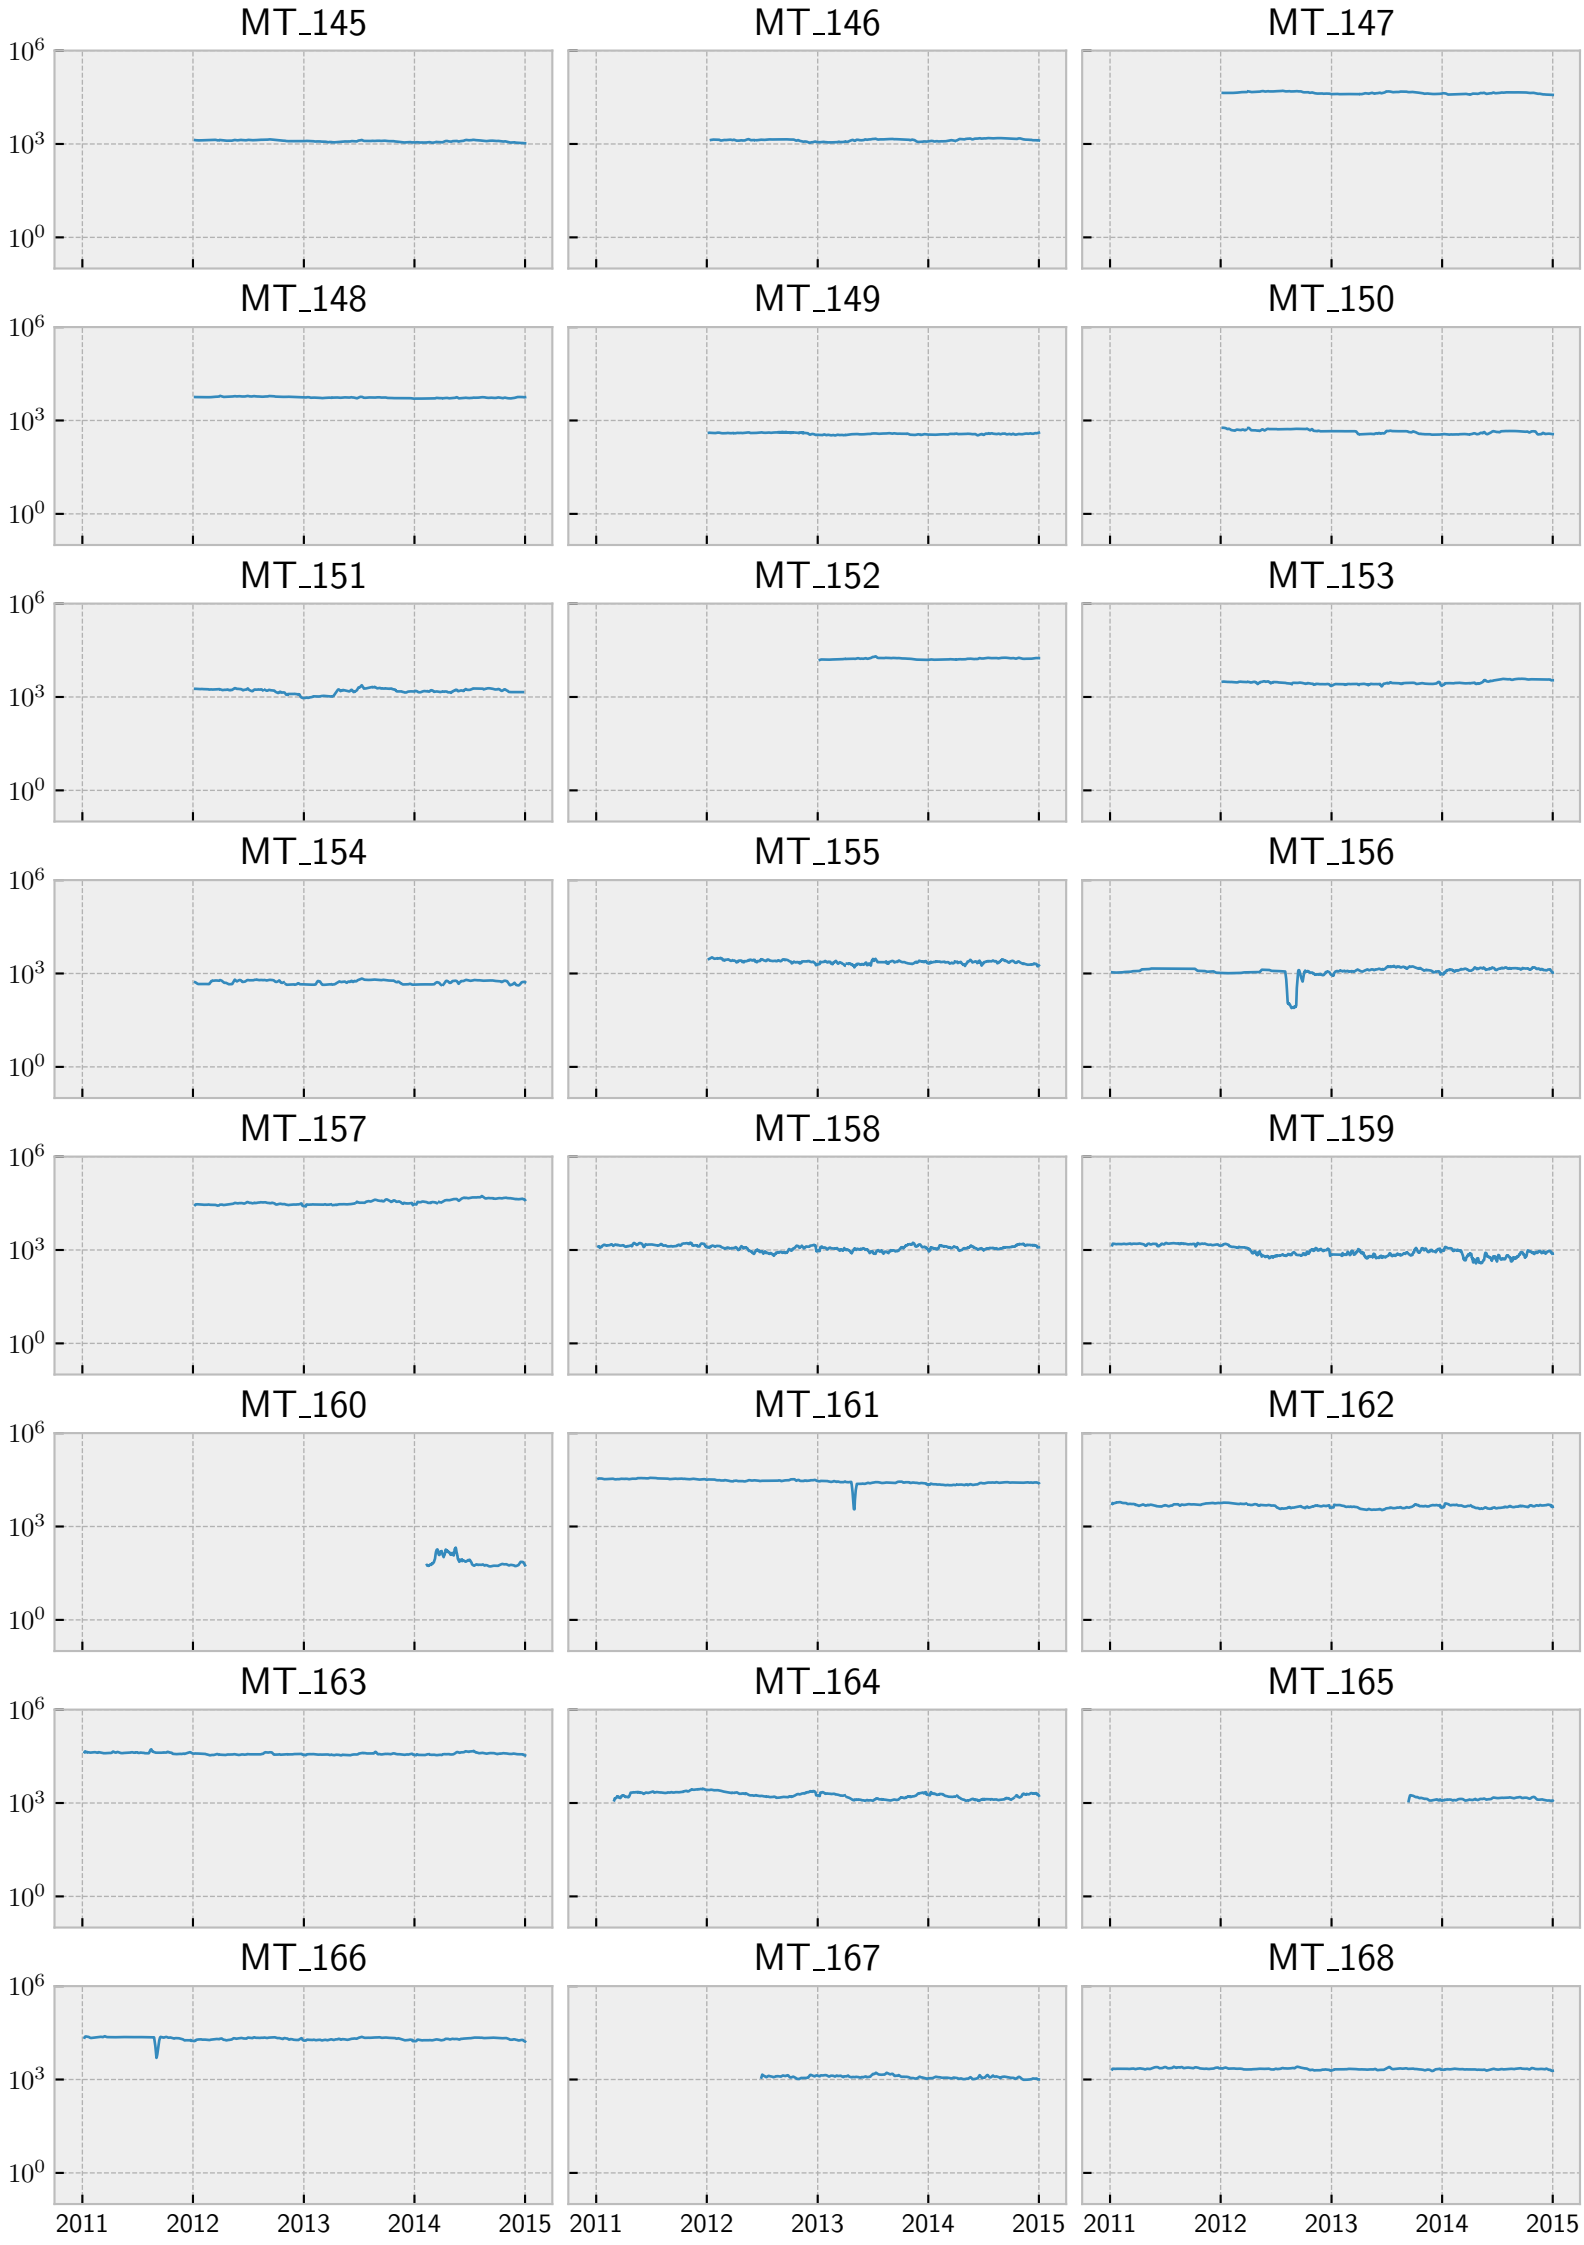

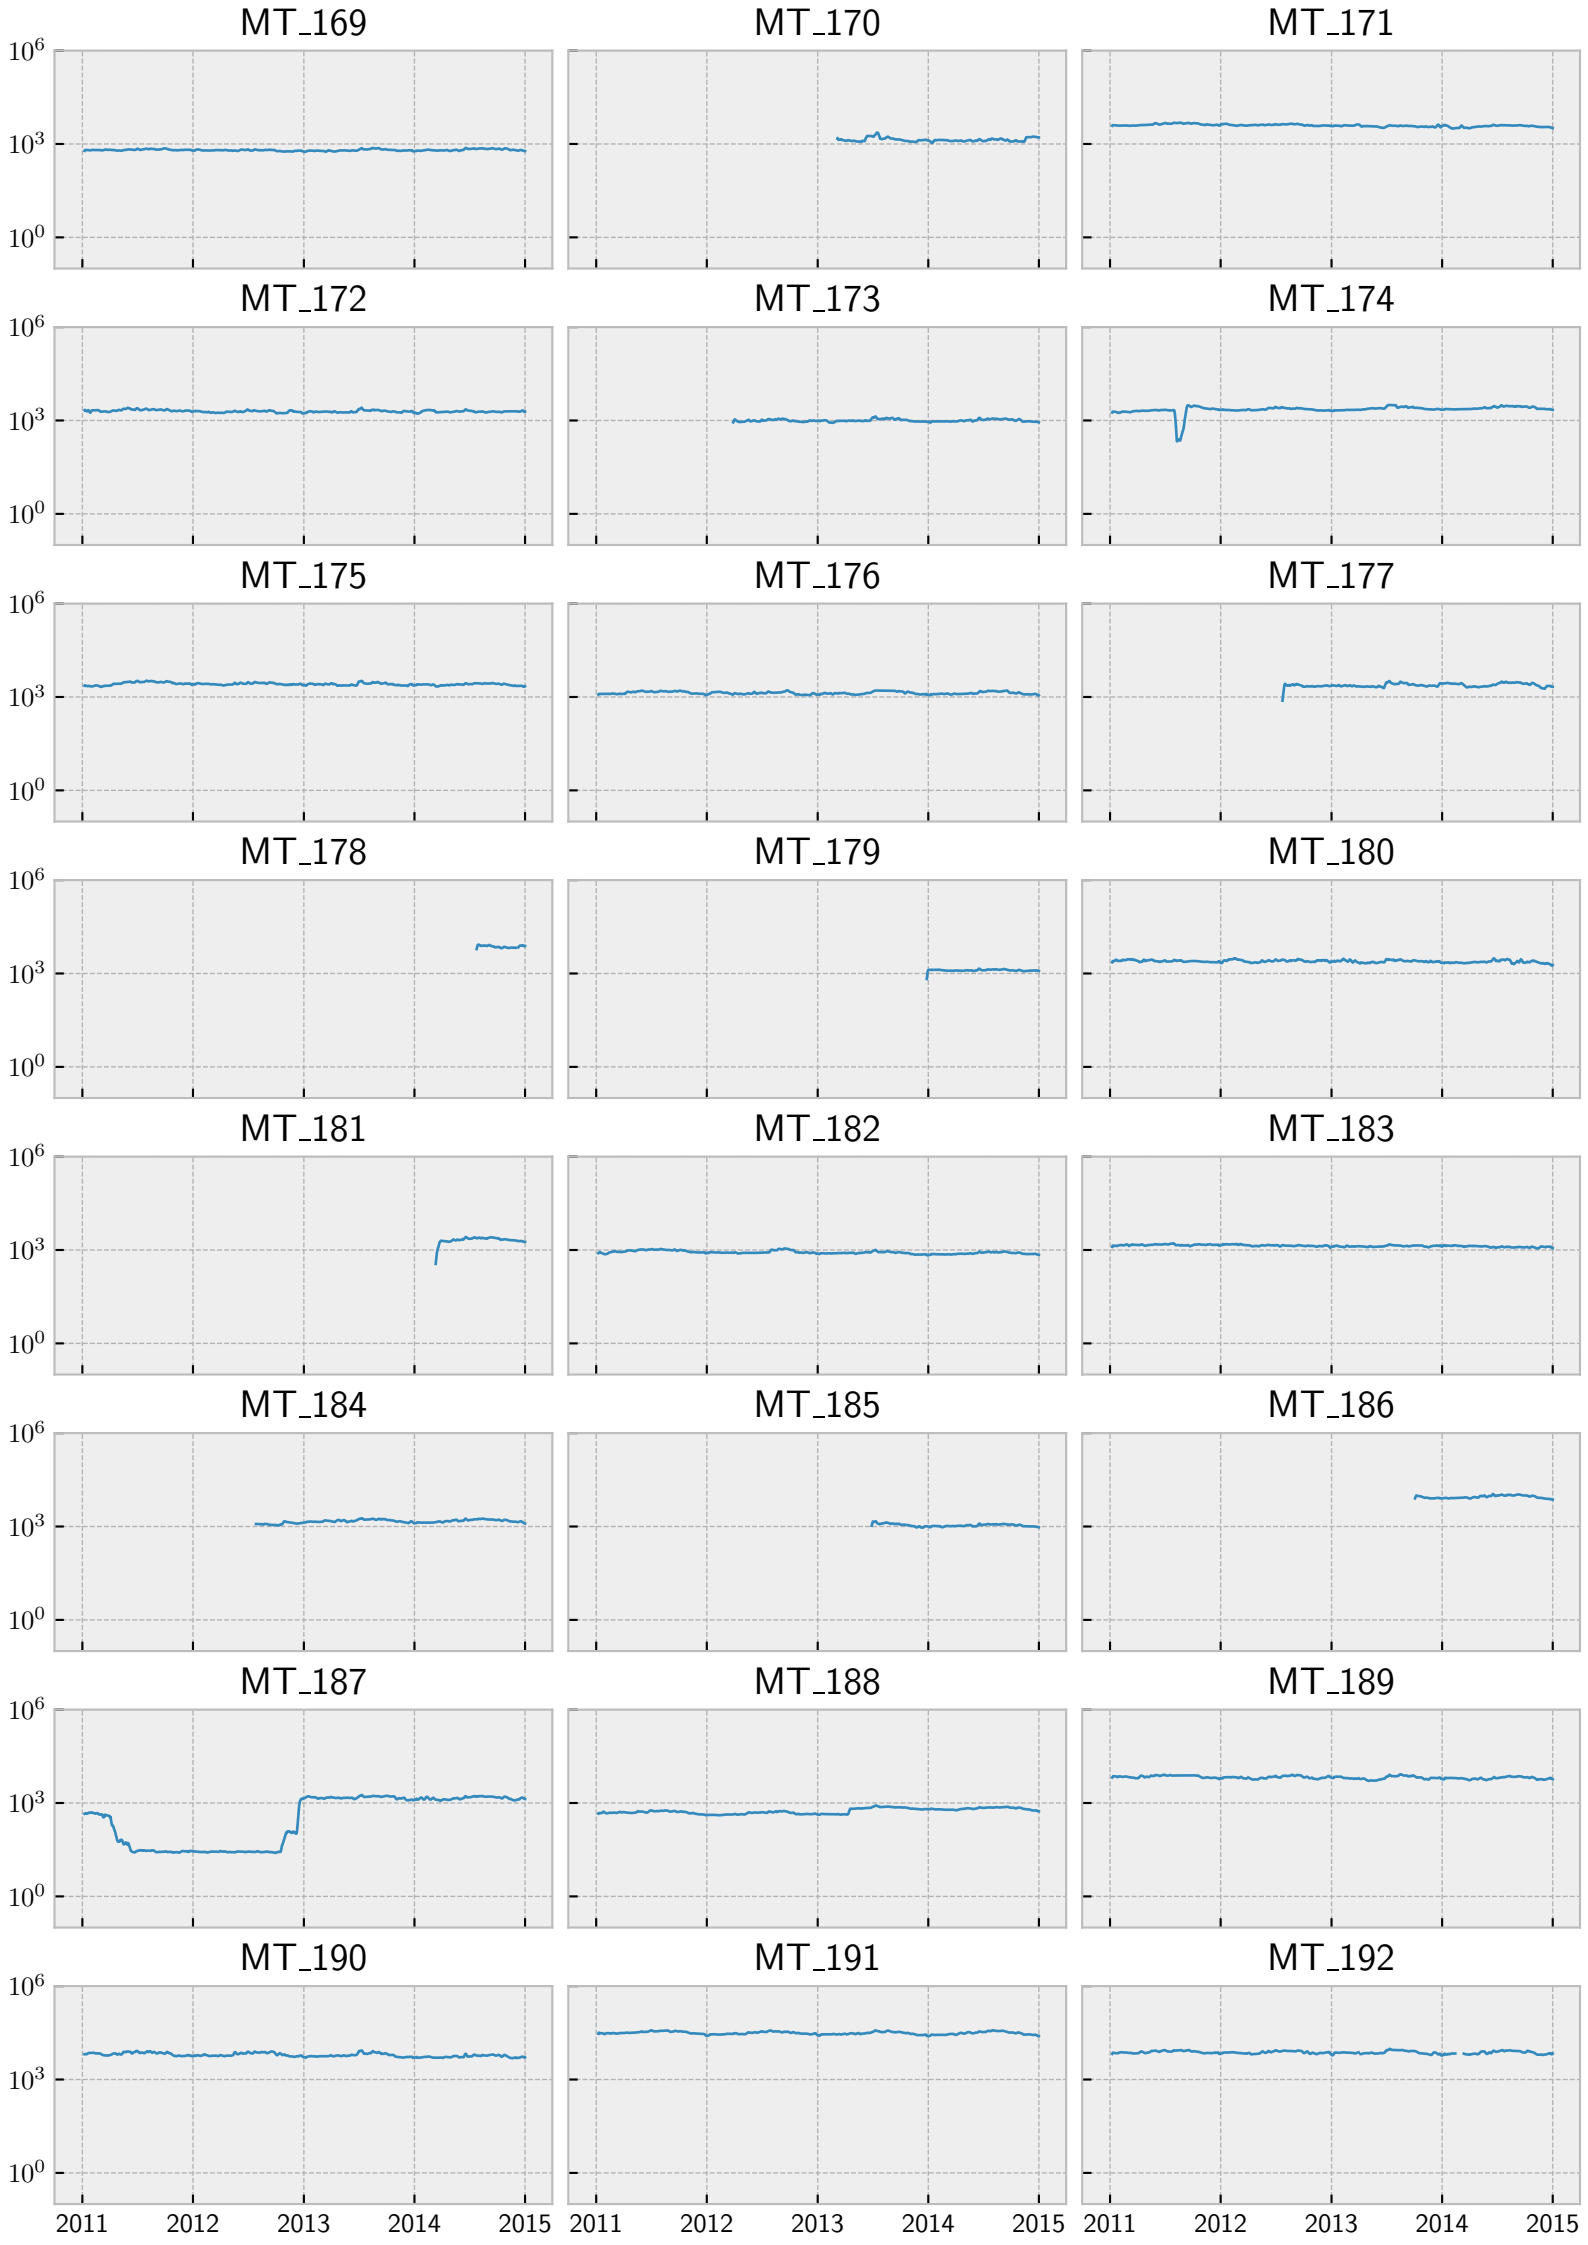



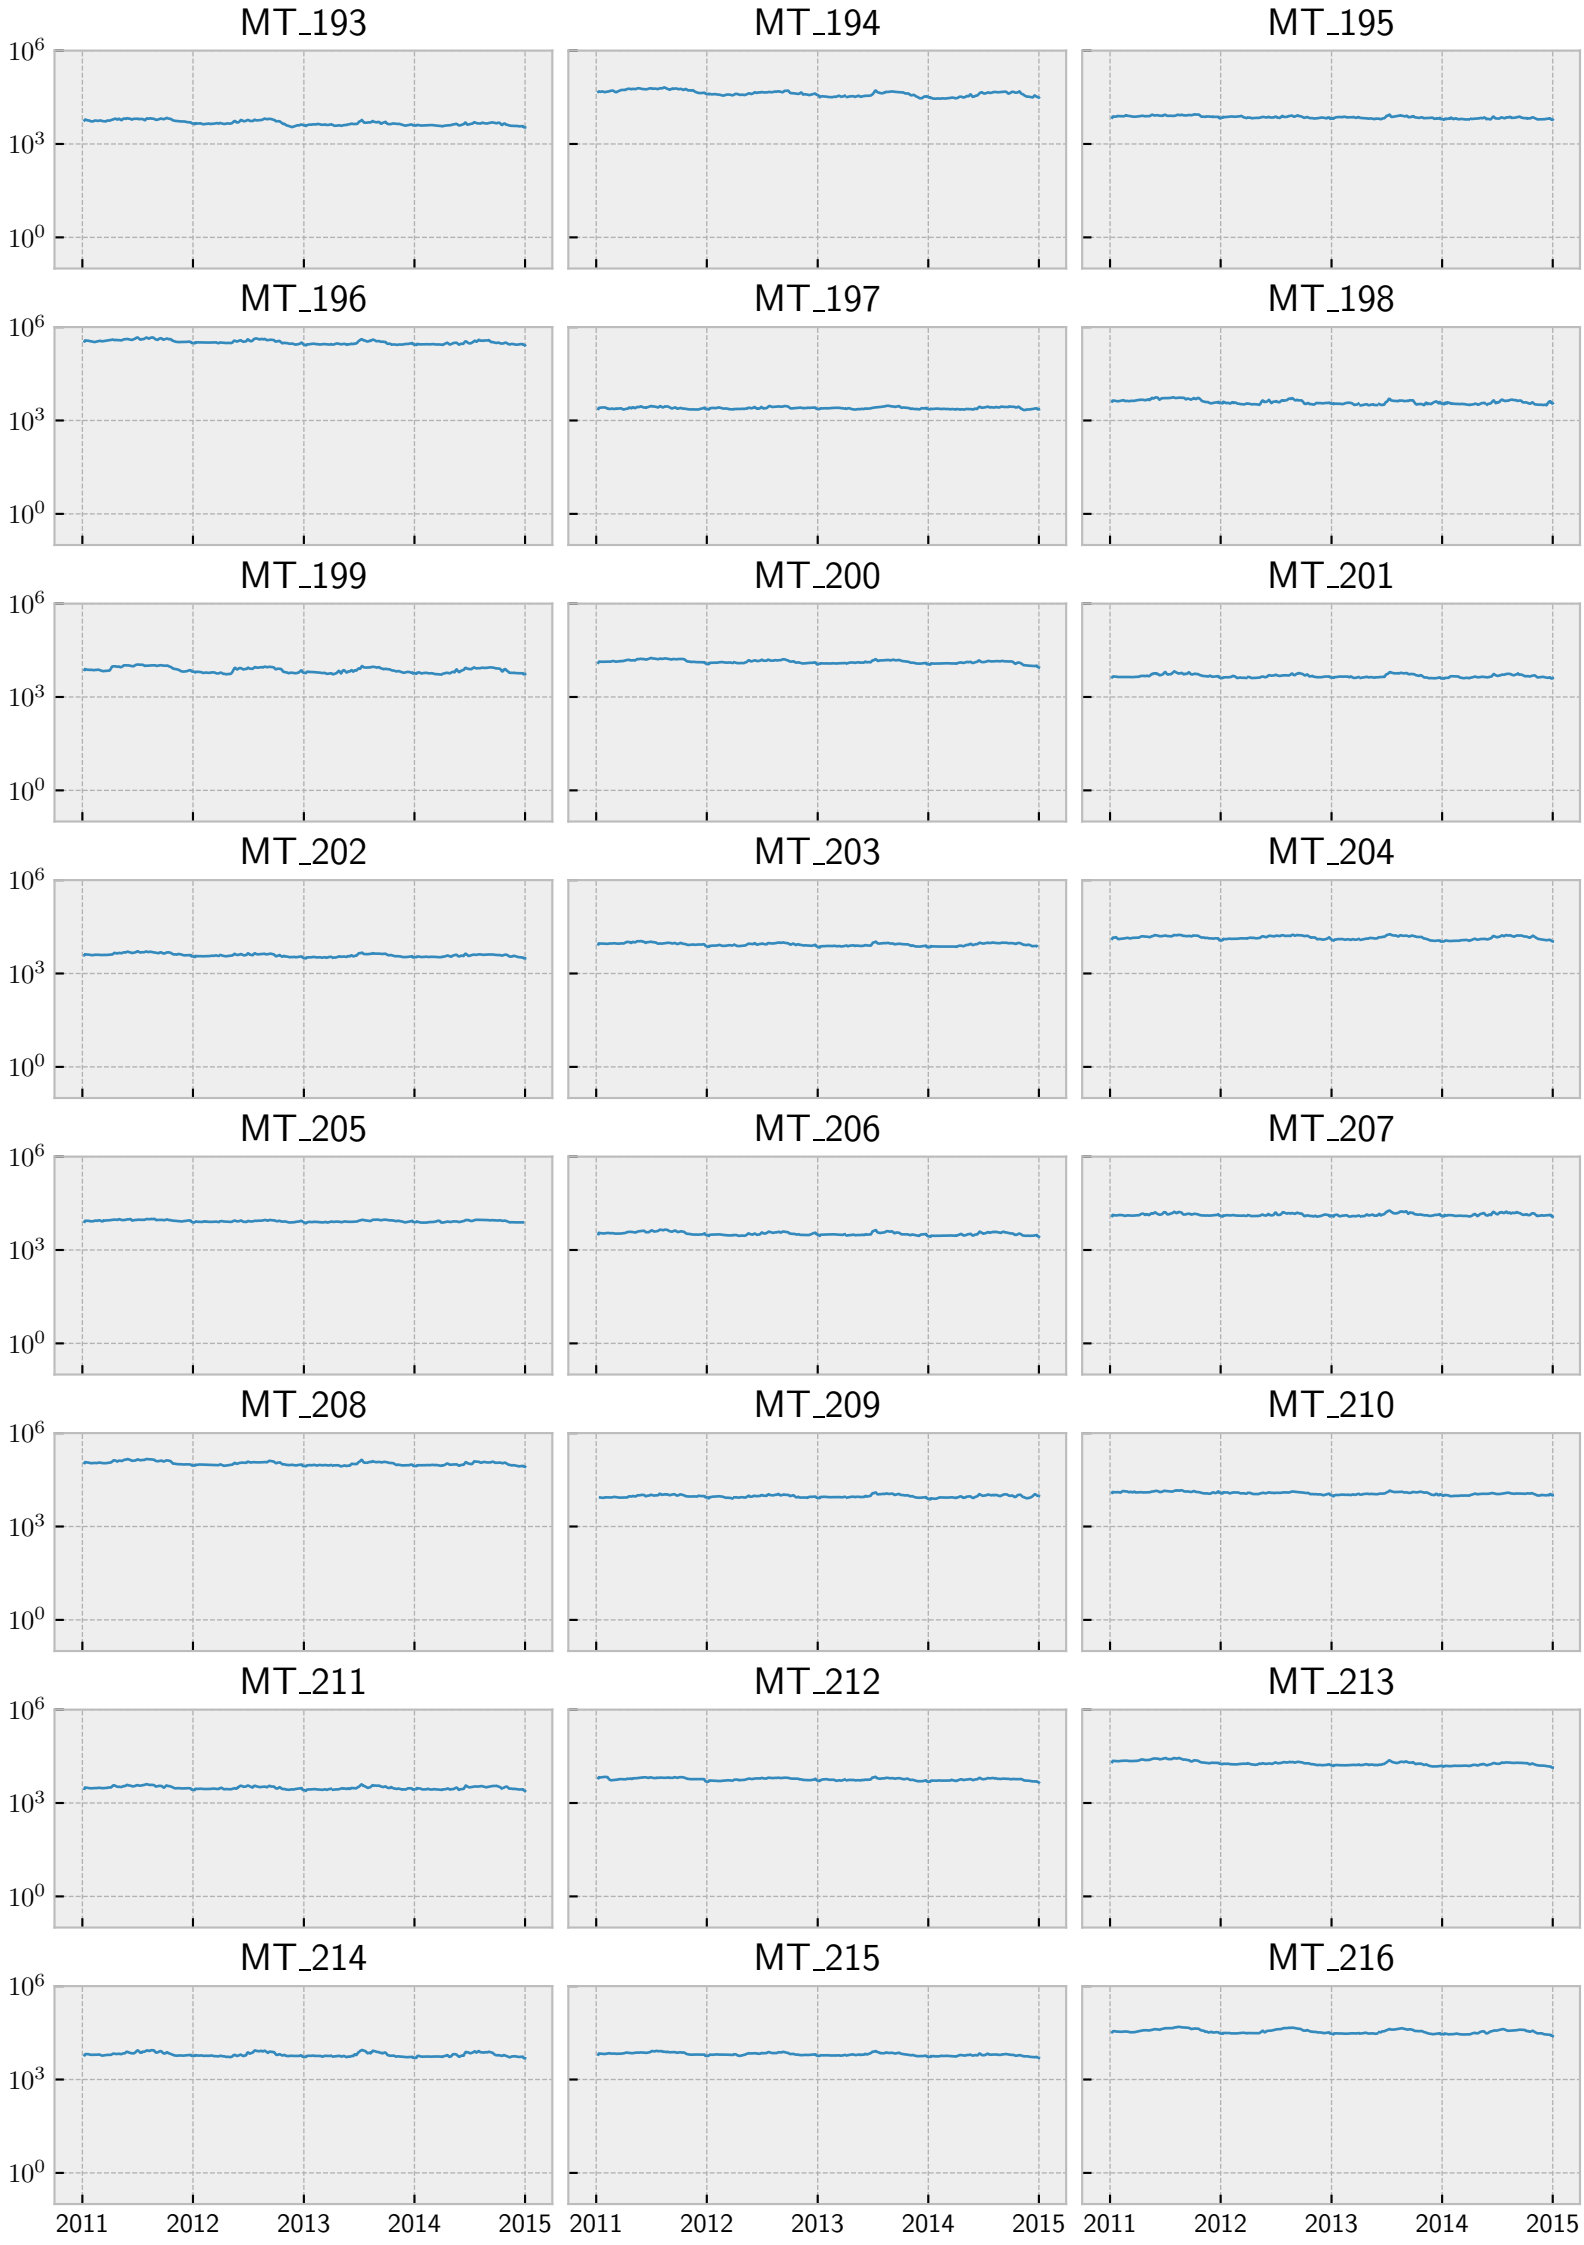

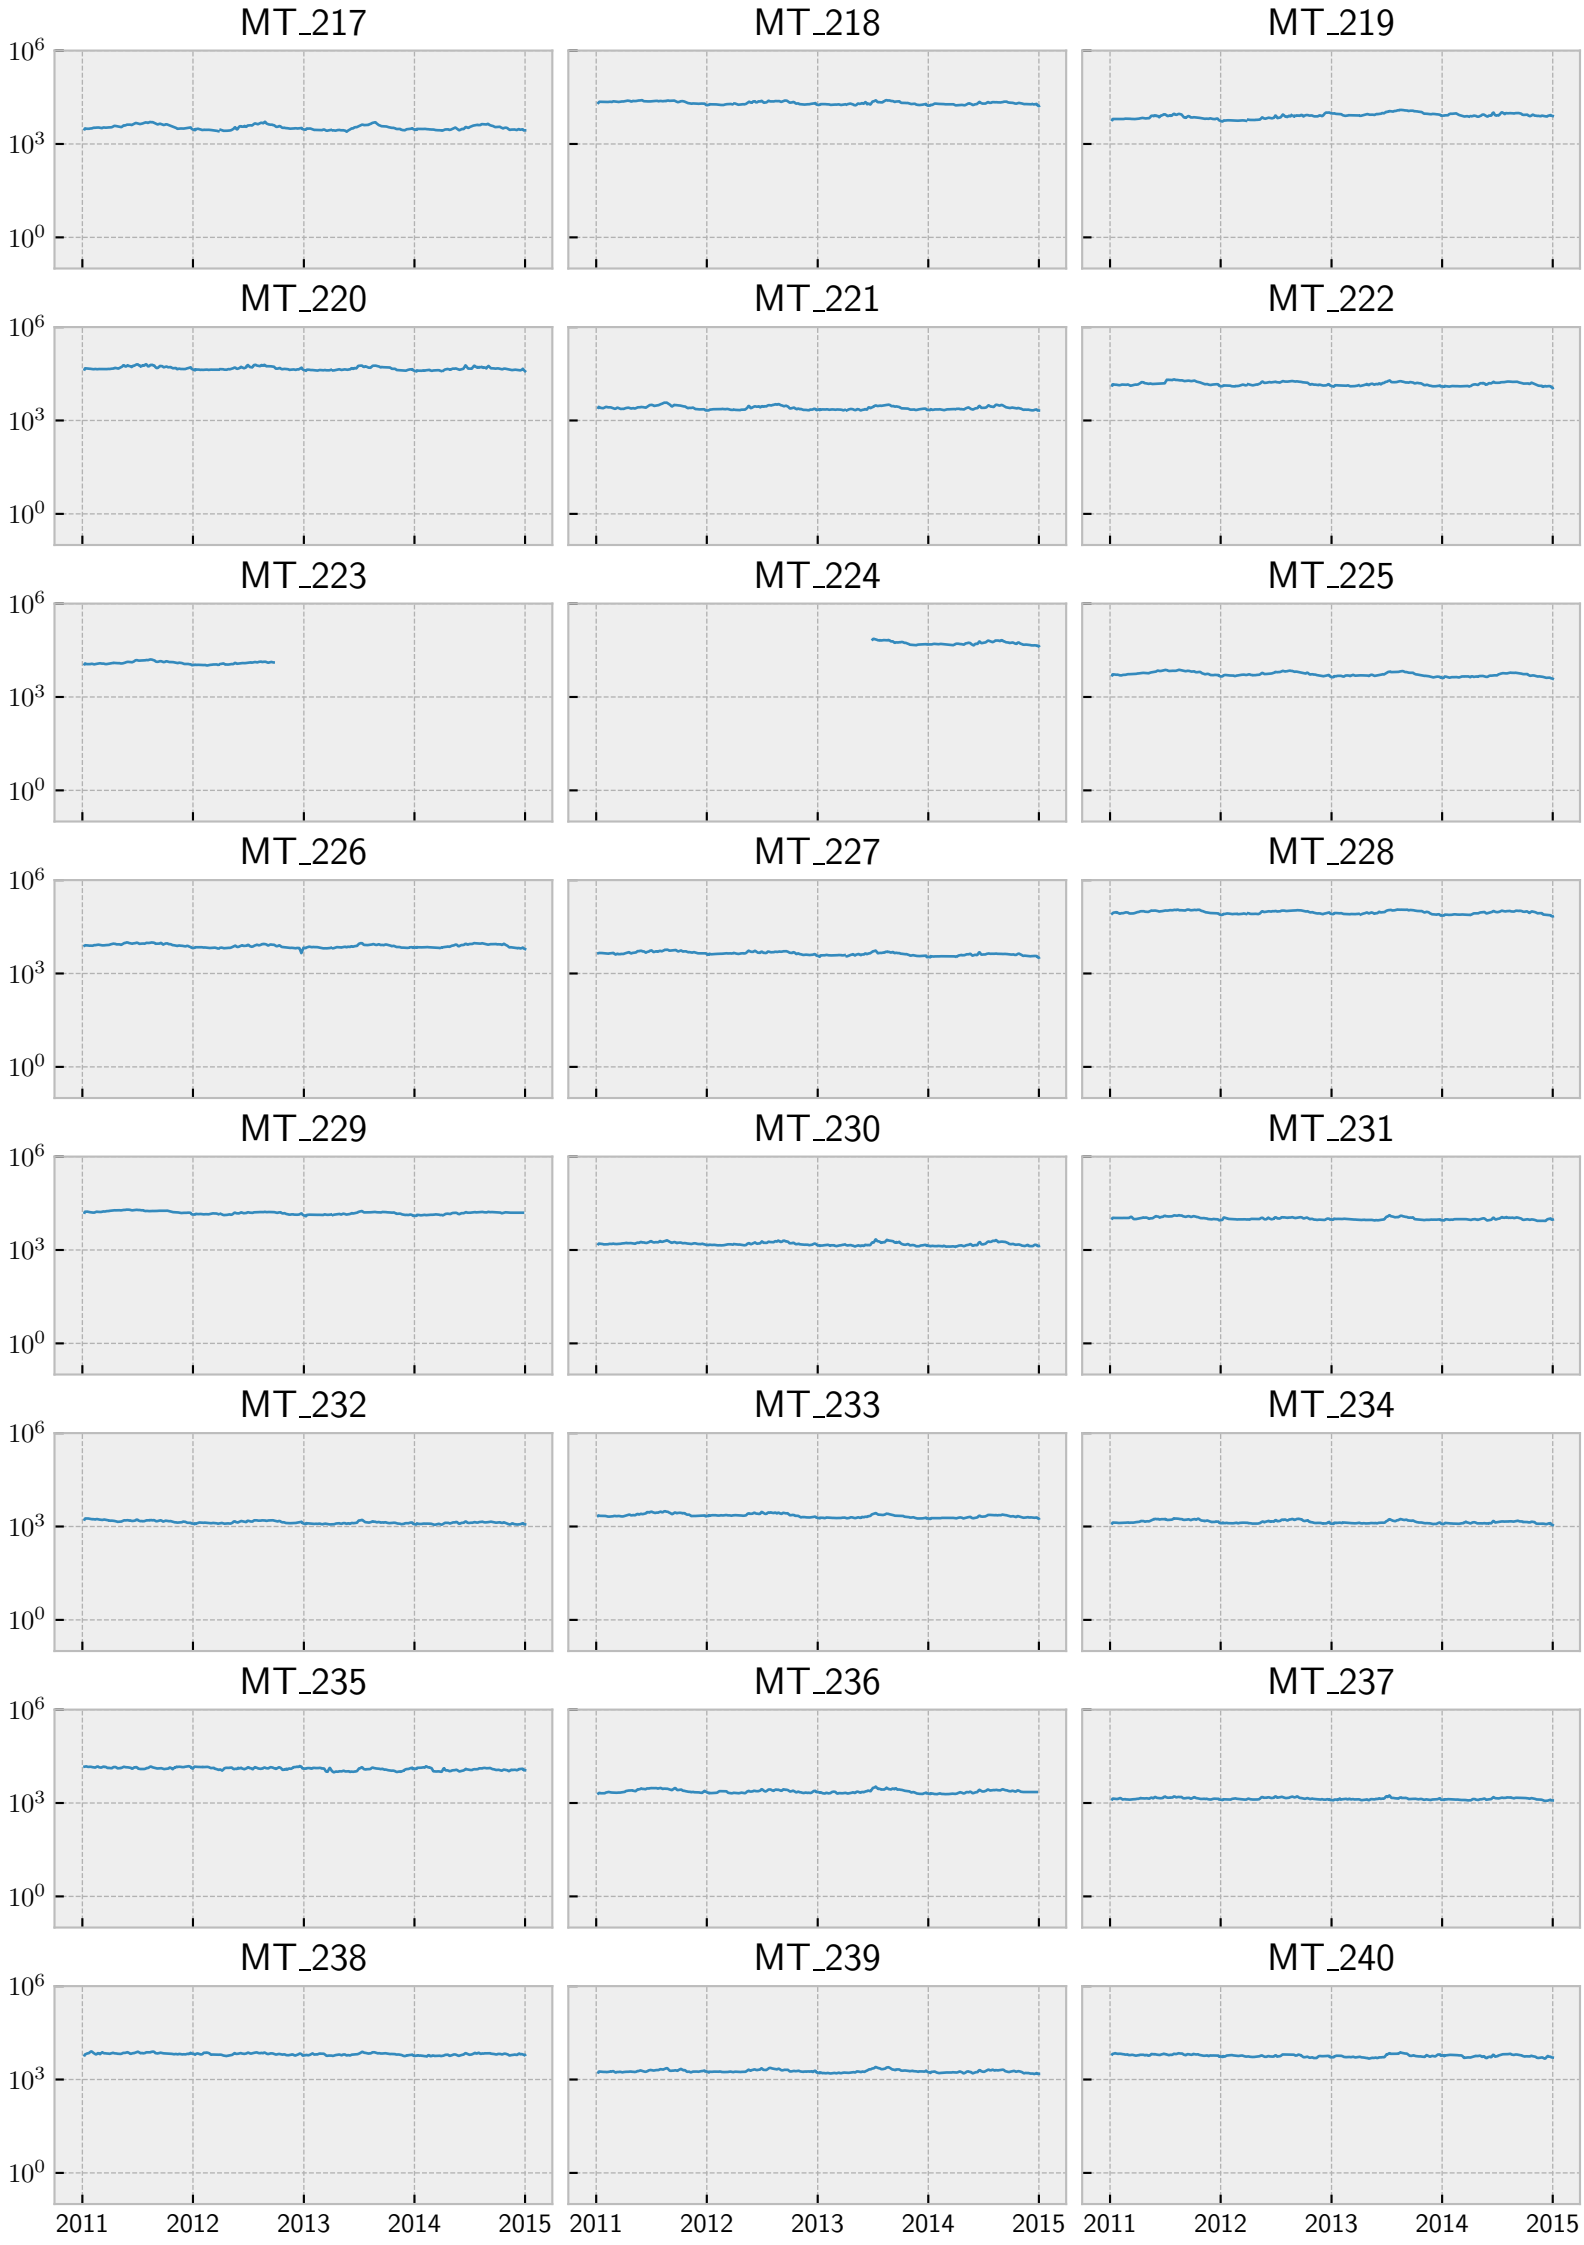

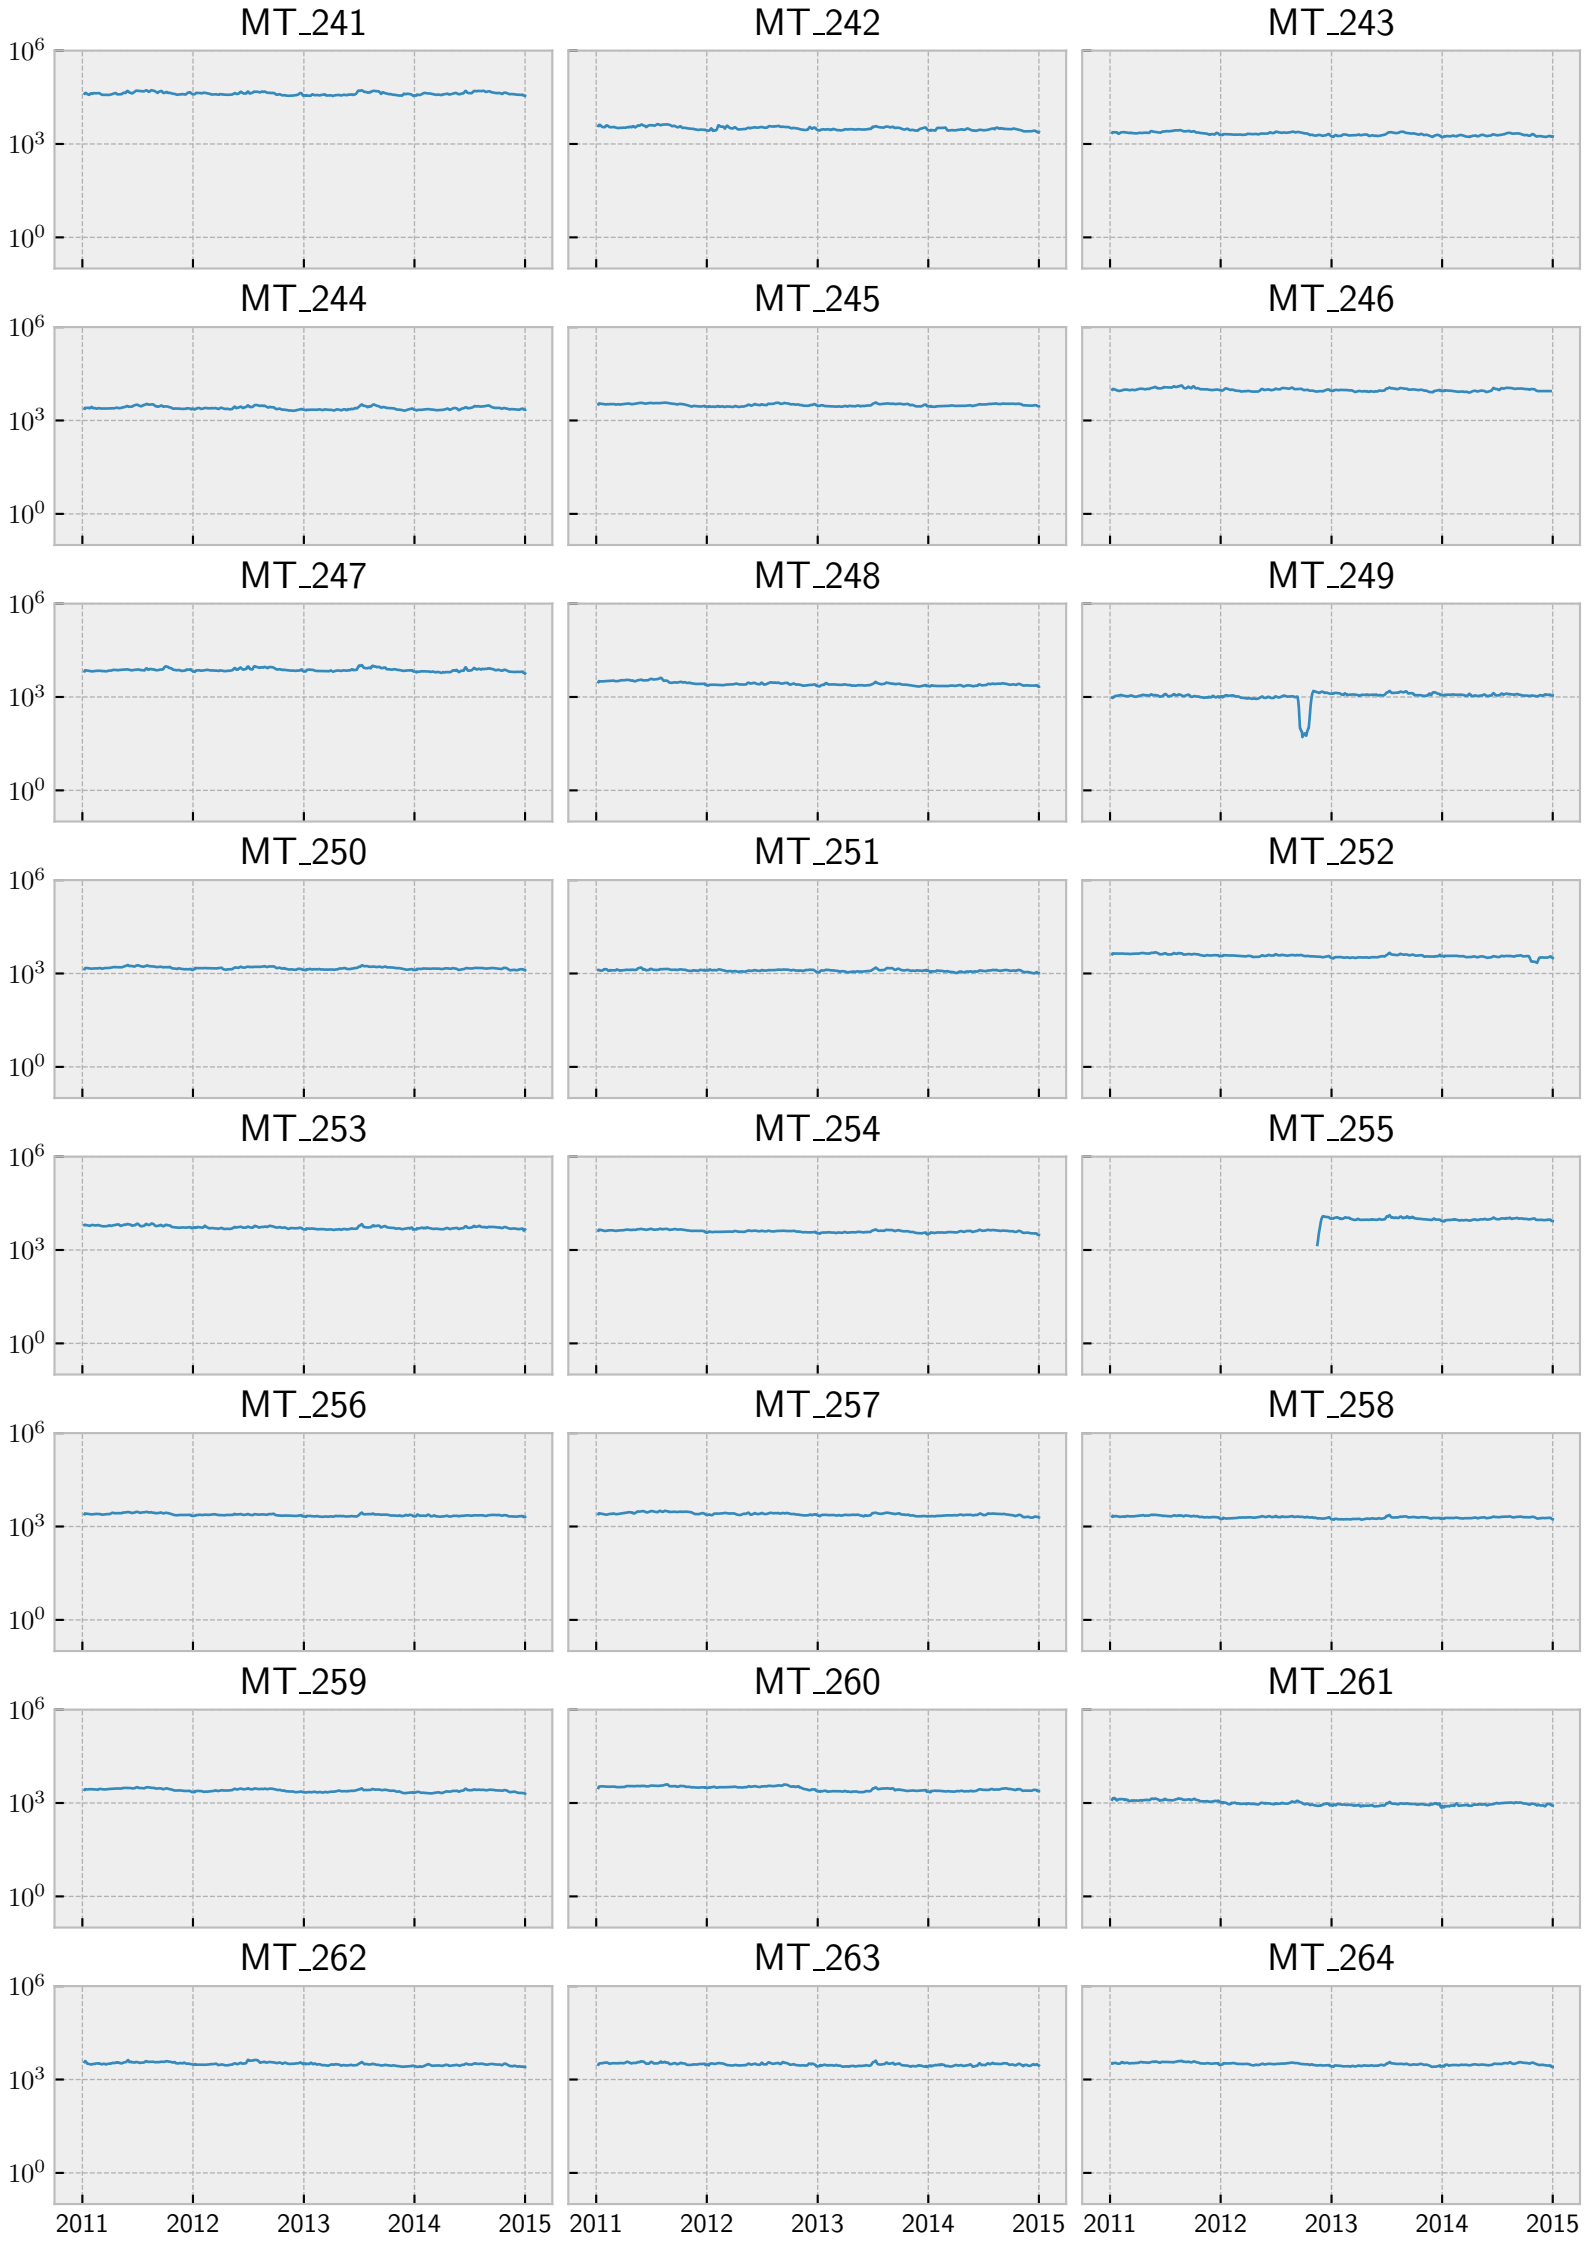

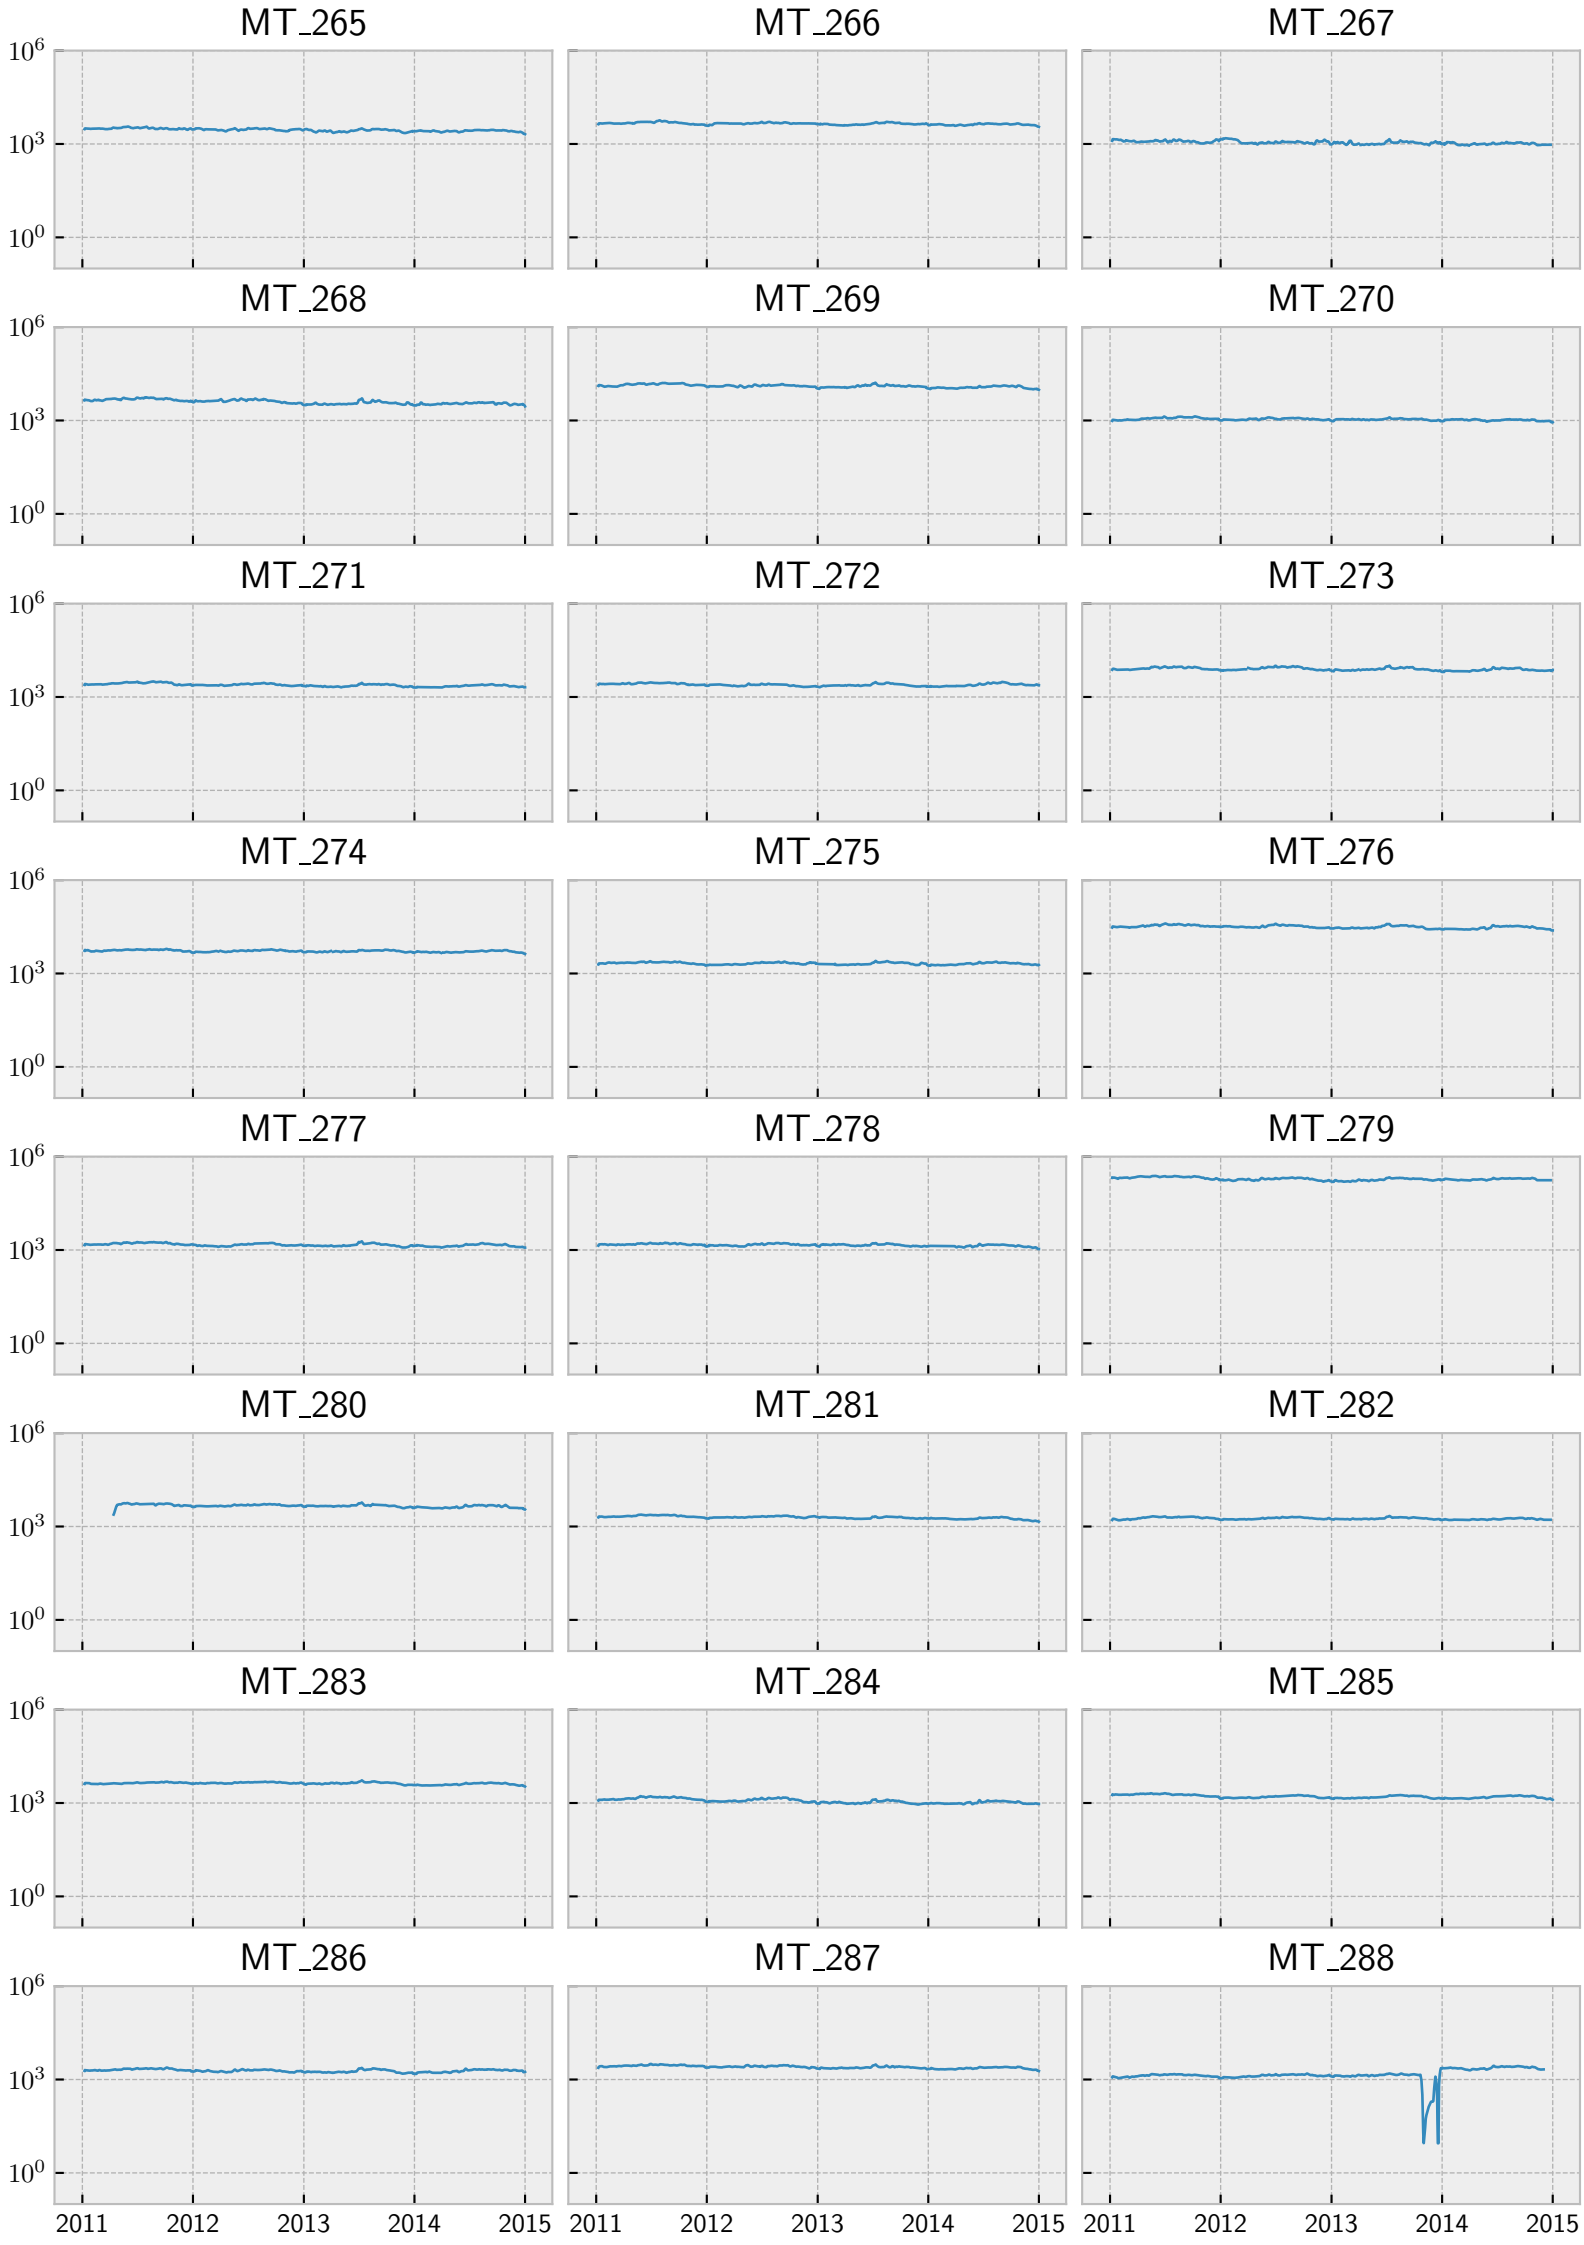

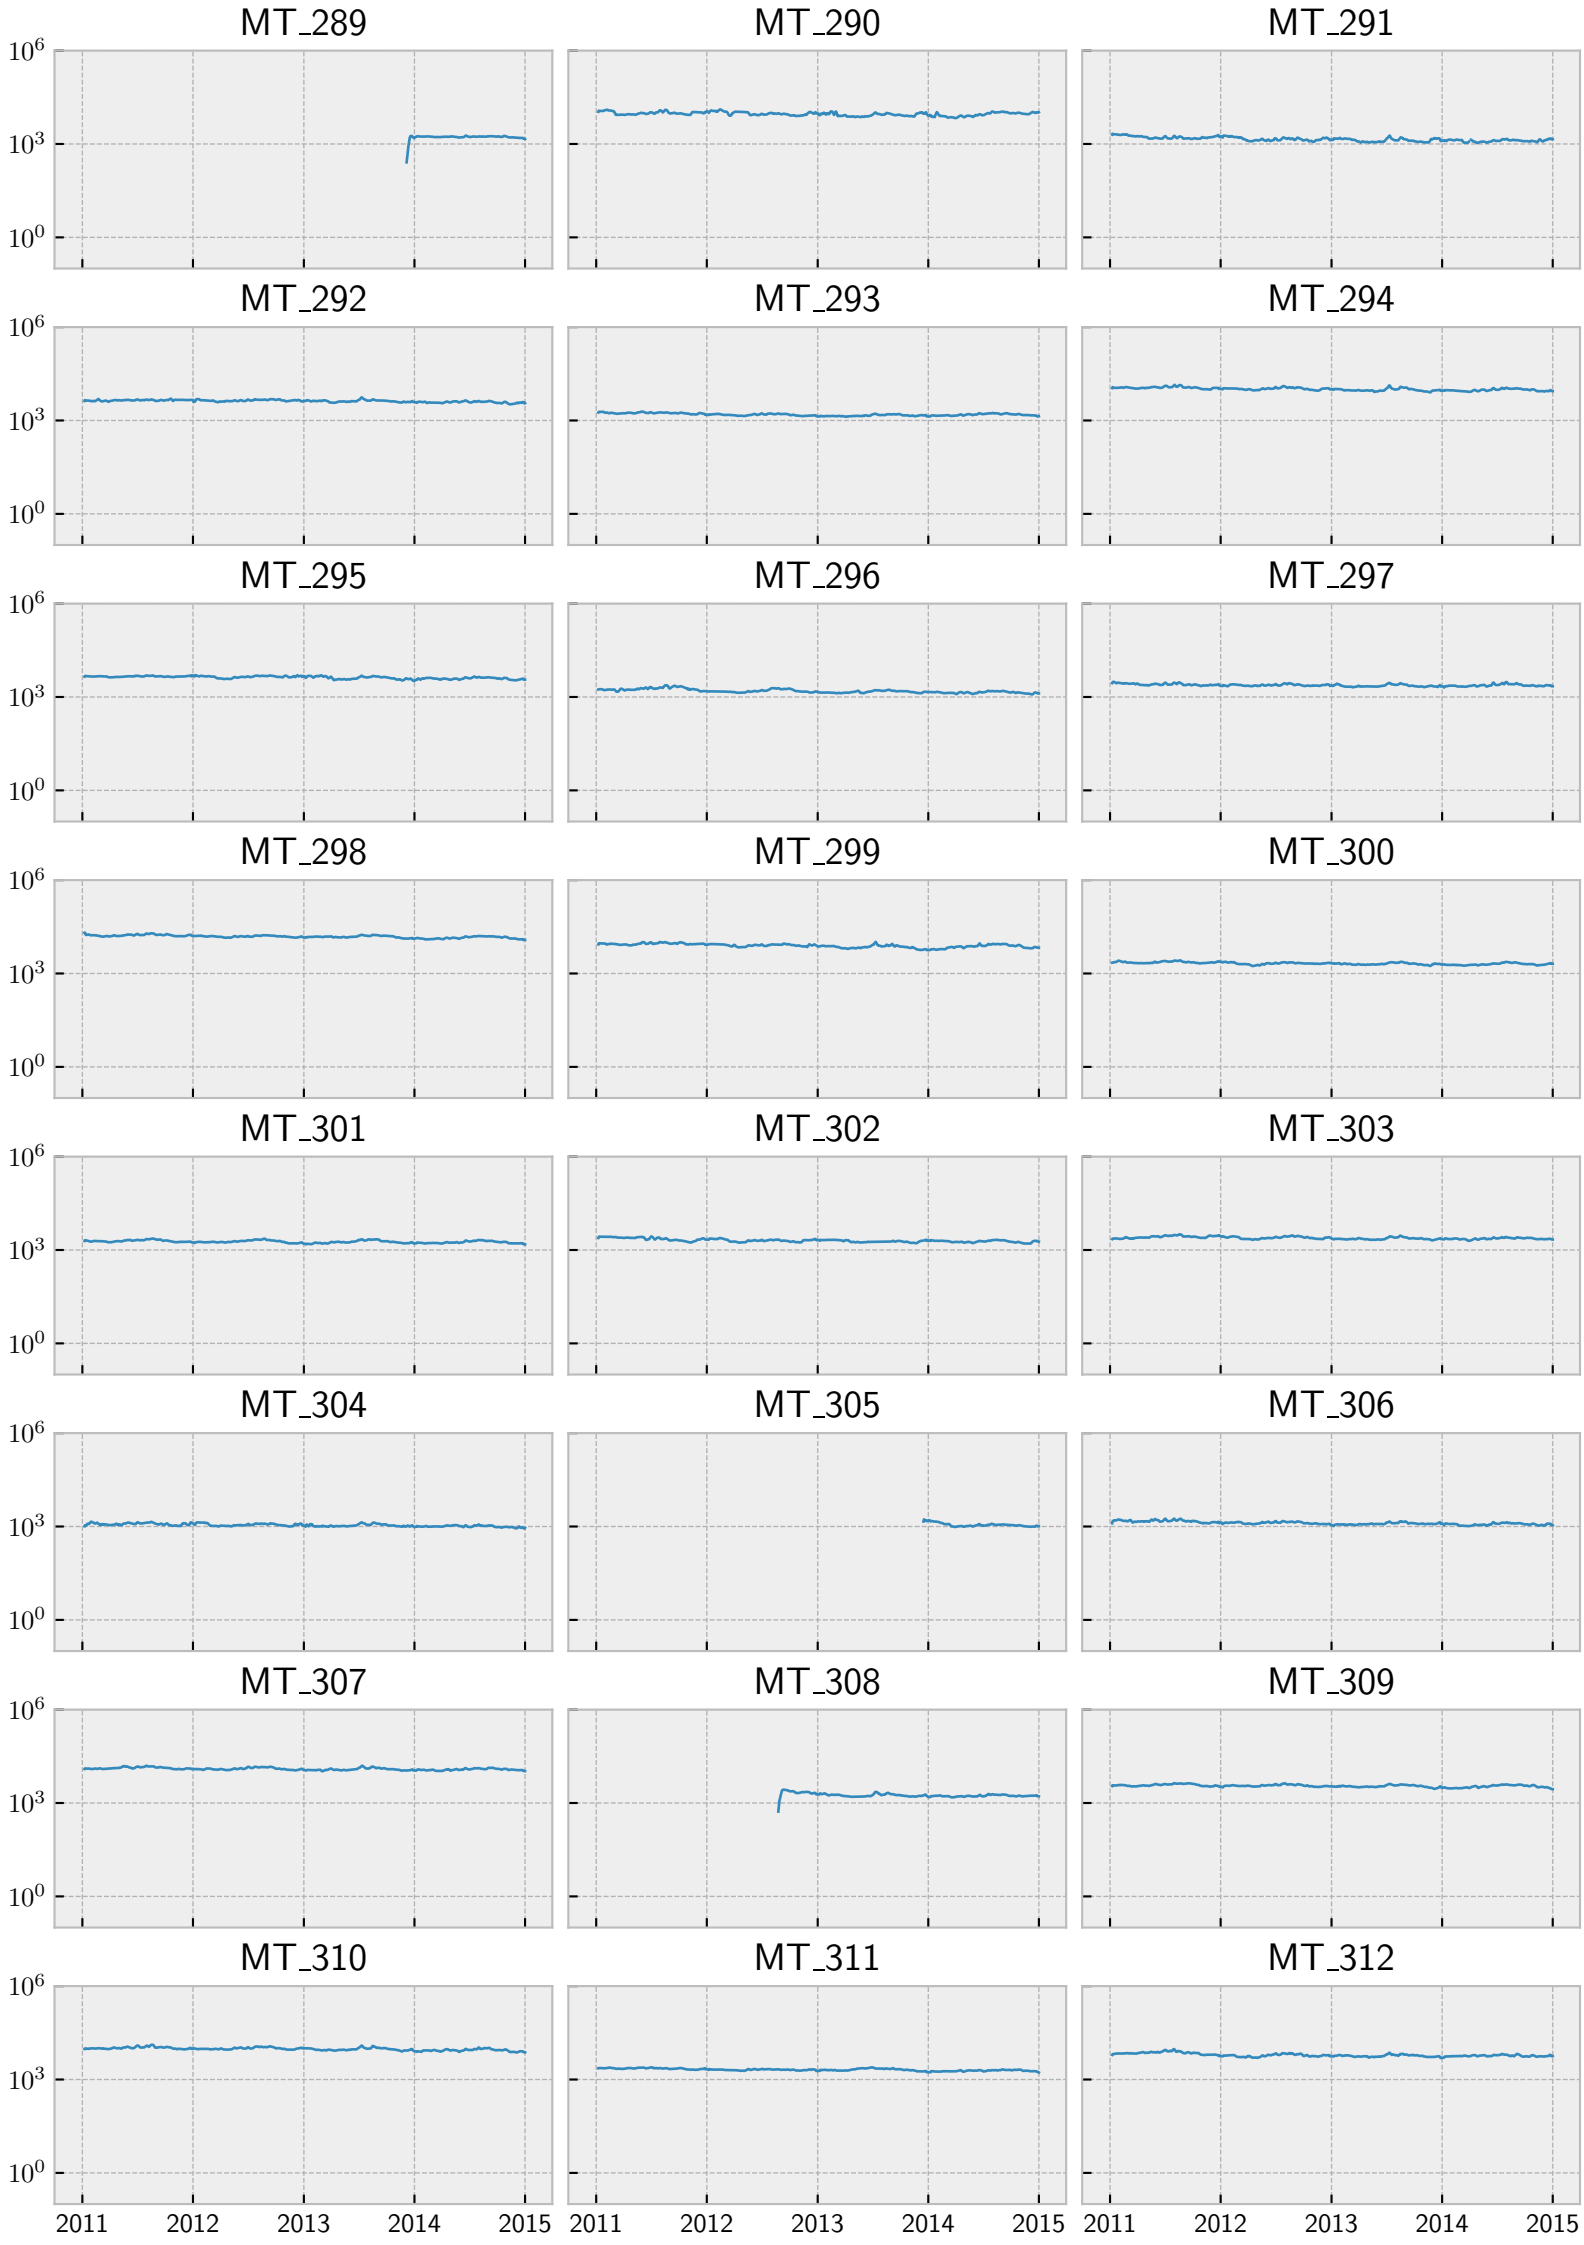

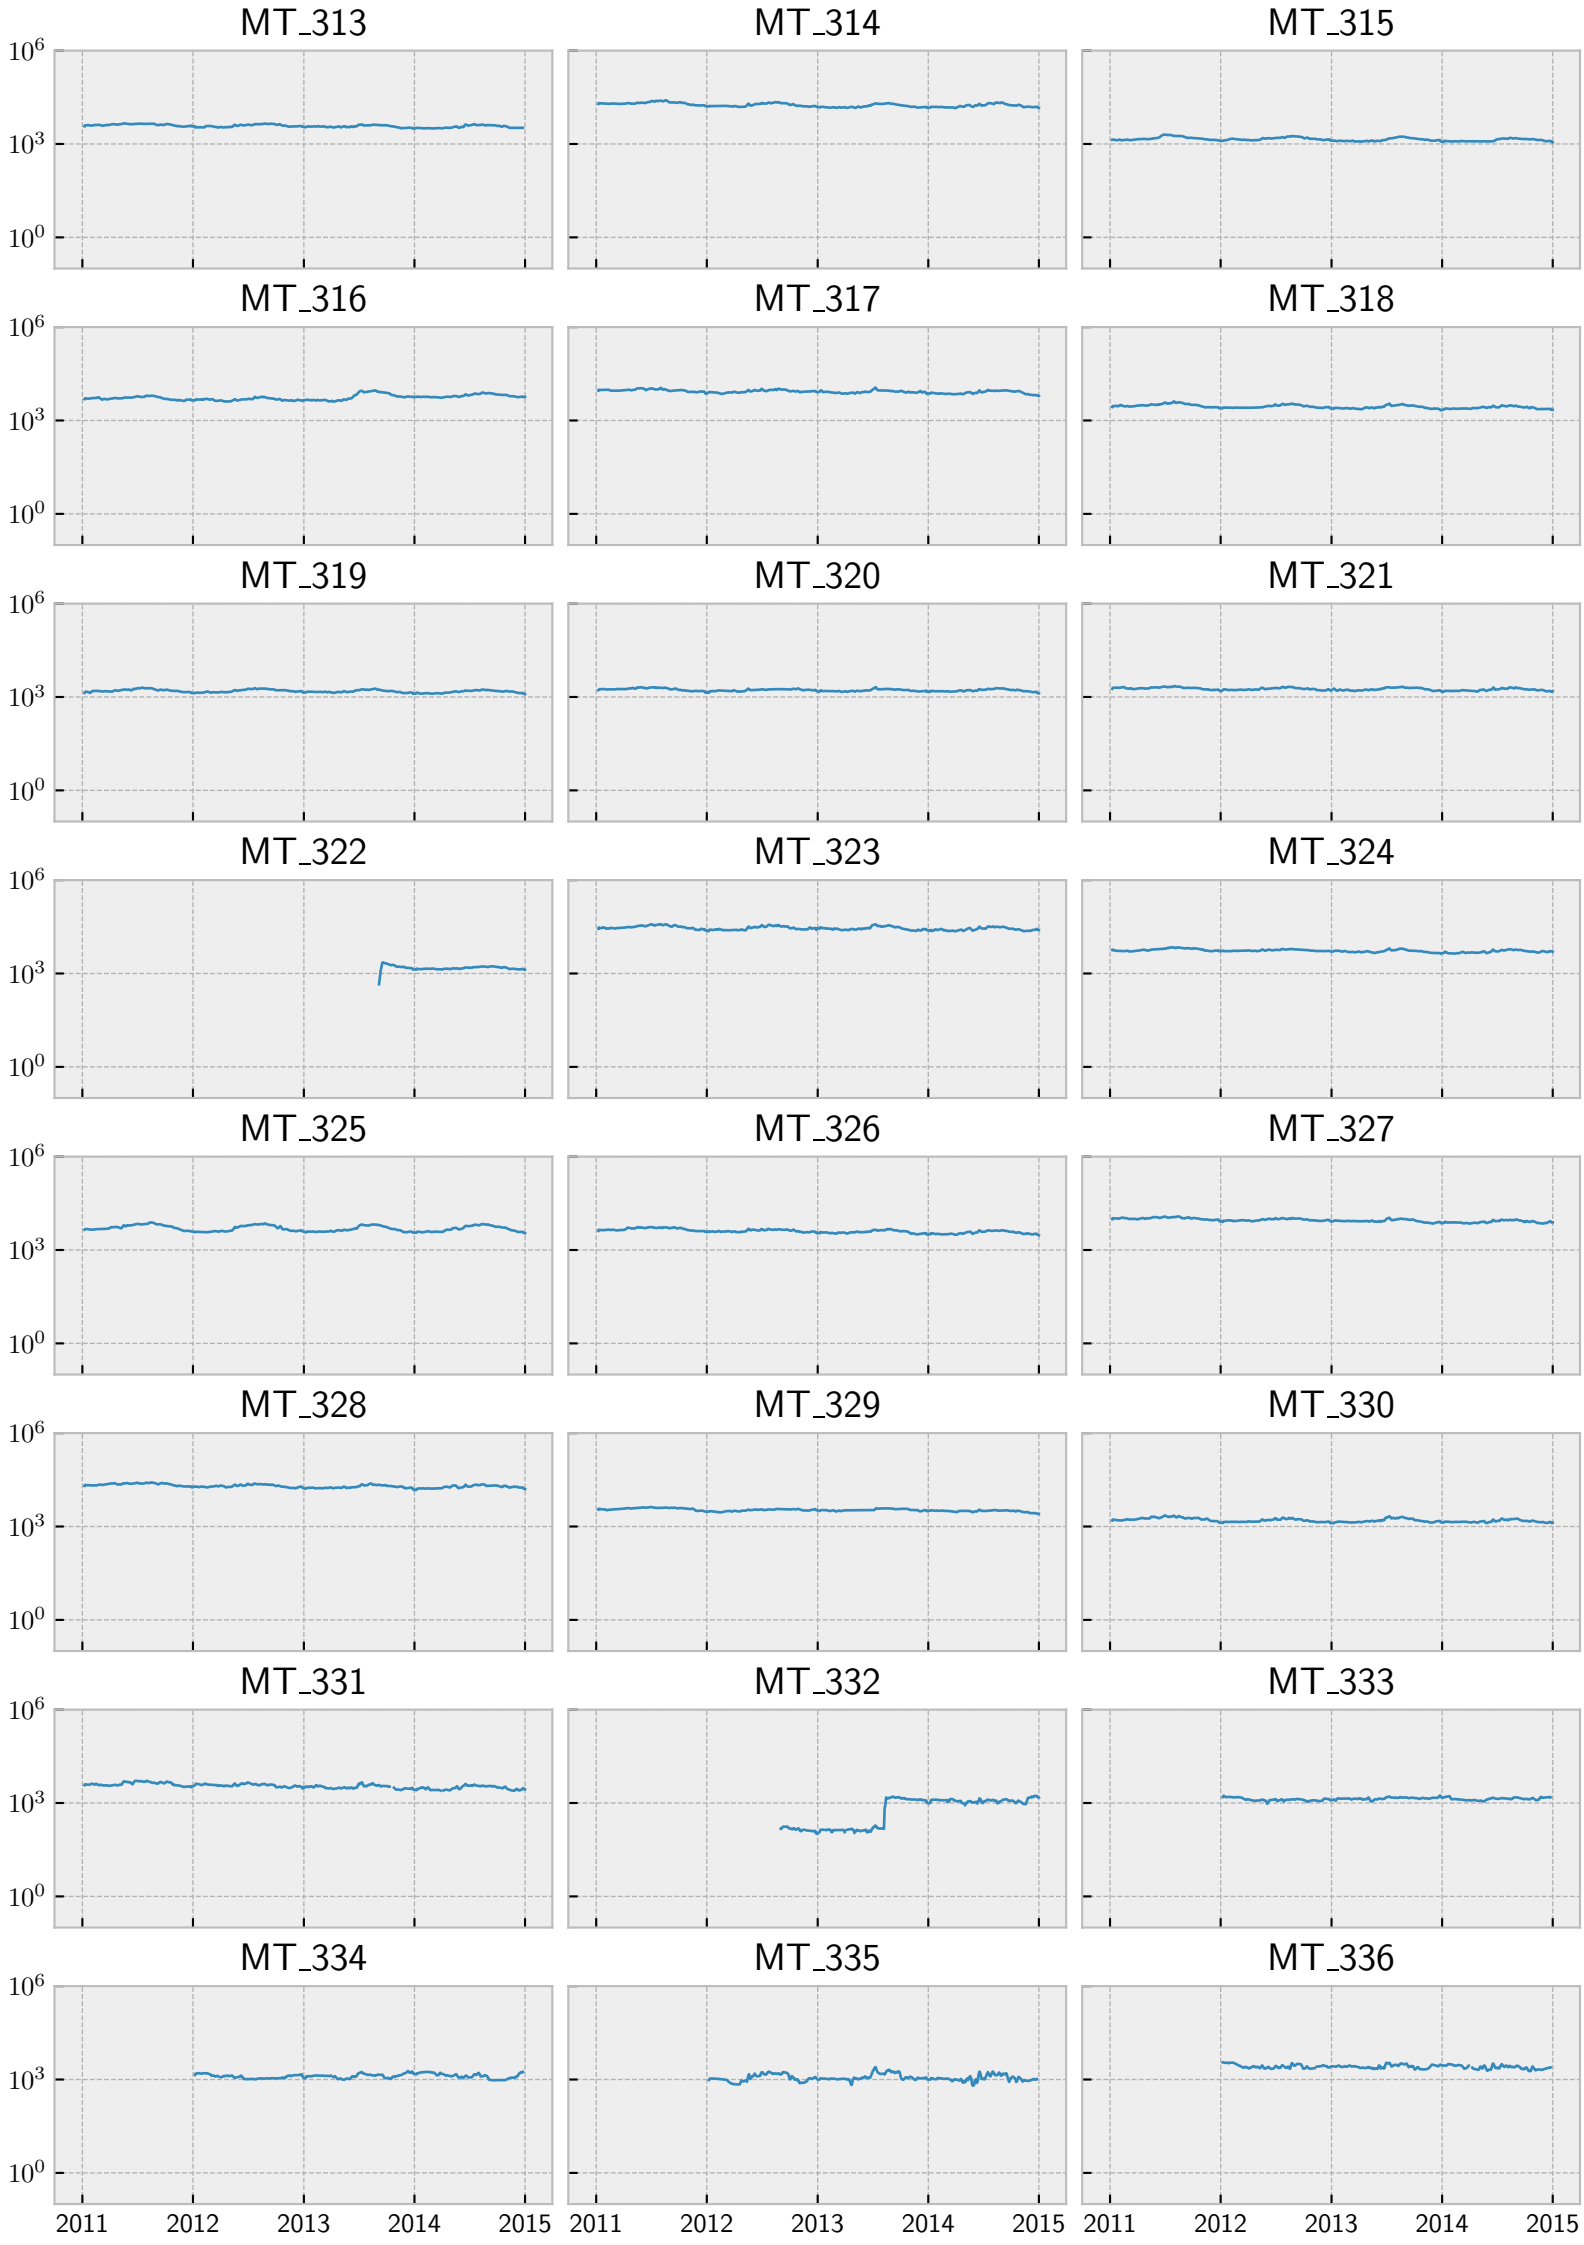

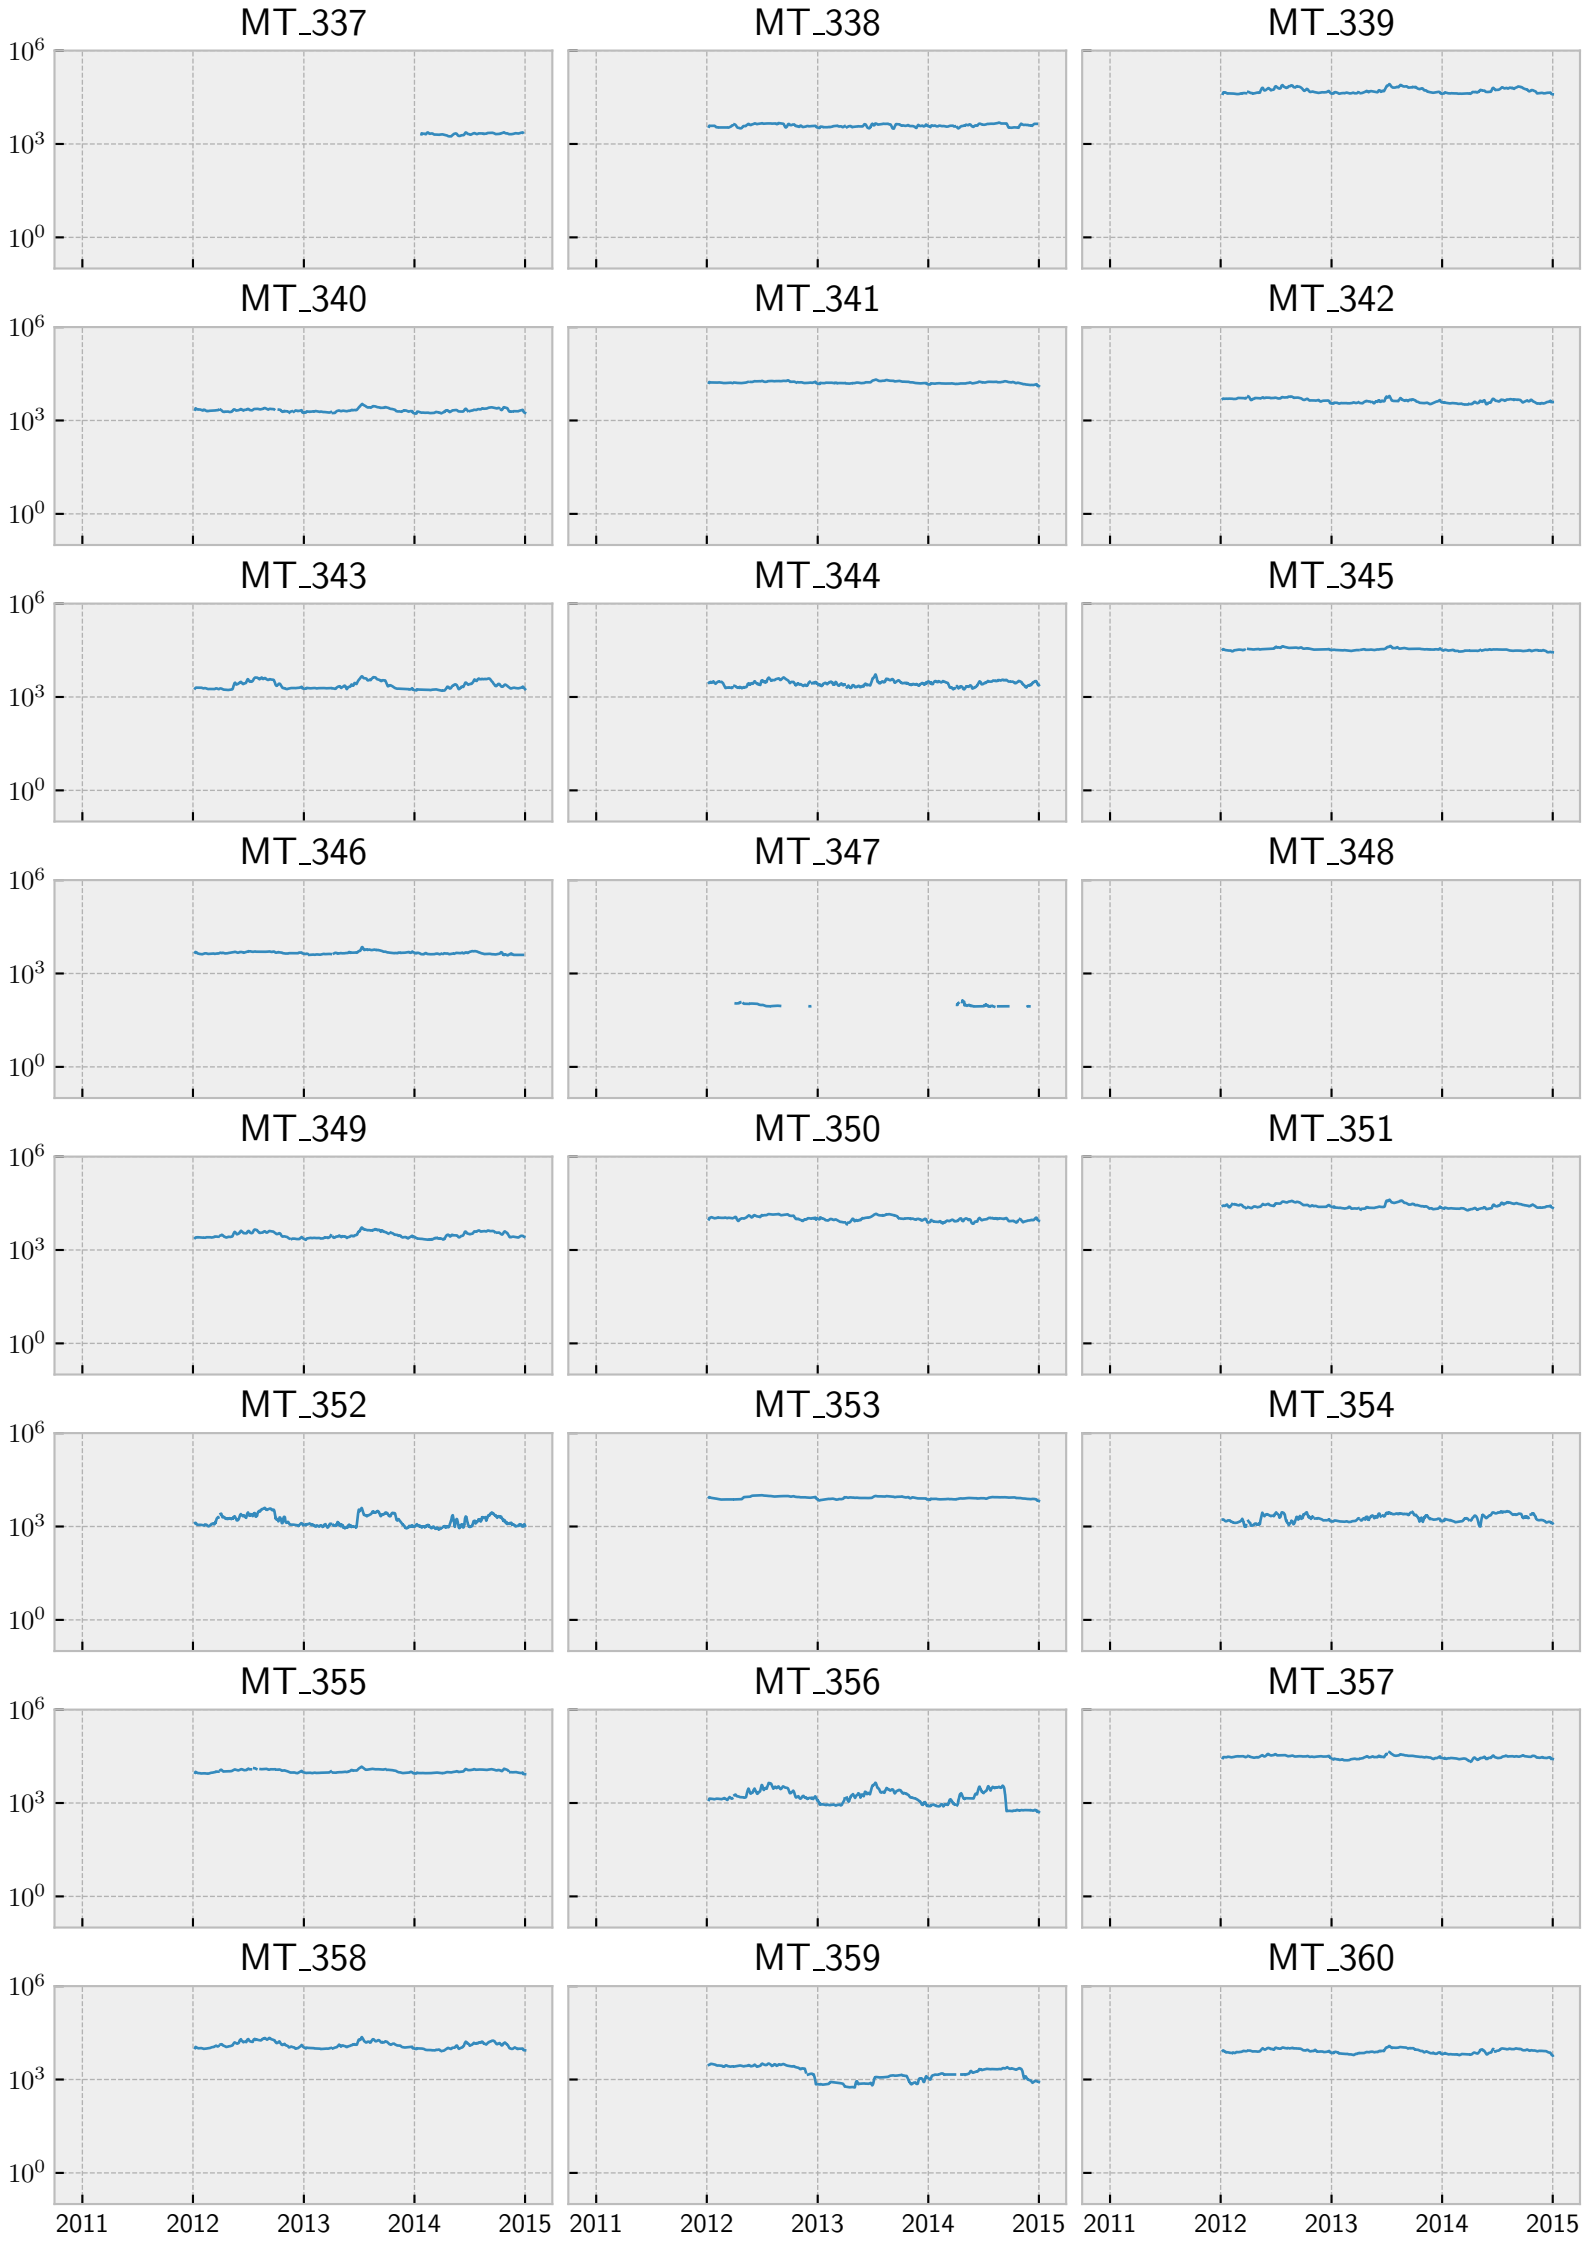

MT\_361

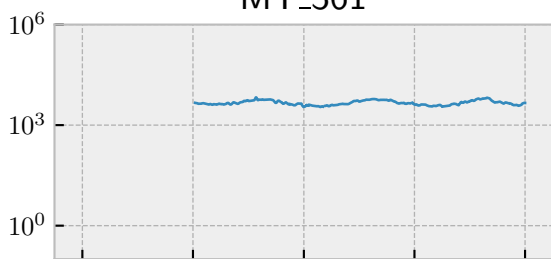

MT\_362

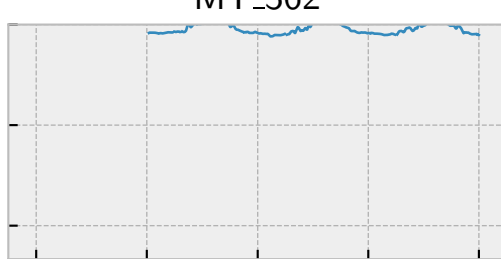

MT\_363

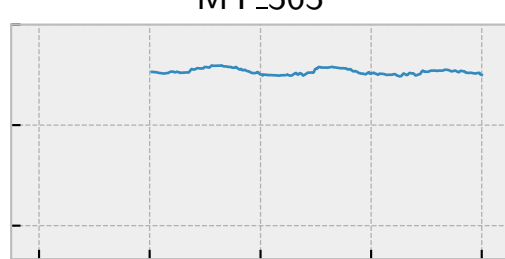

MT\_364

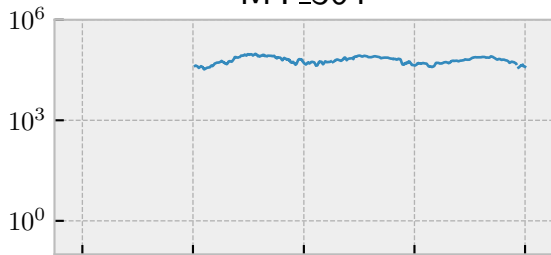

MT\_365

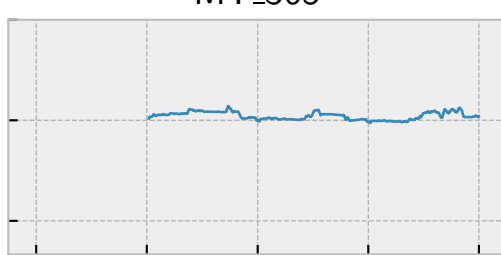

MT\_366

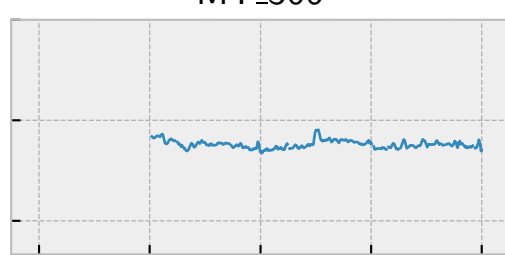

MT\_367

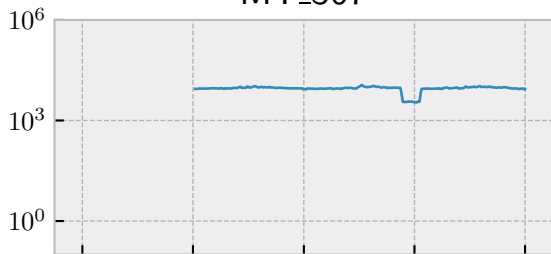

MT\_368

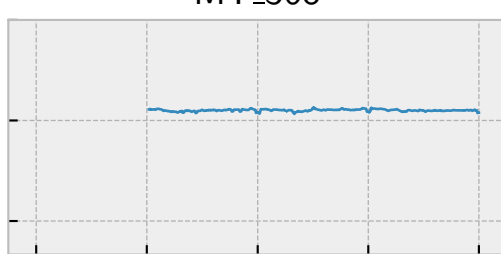

MT\_369

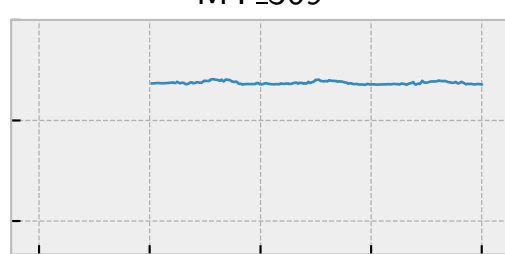

MT\_370

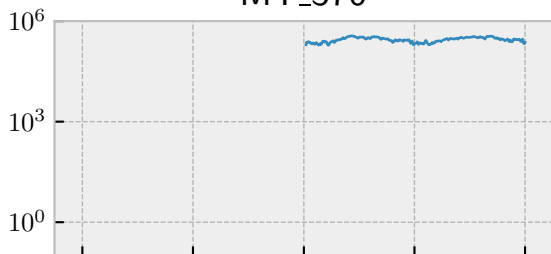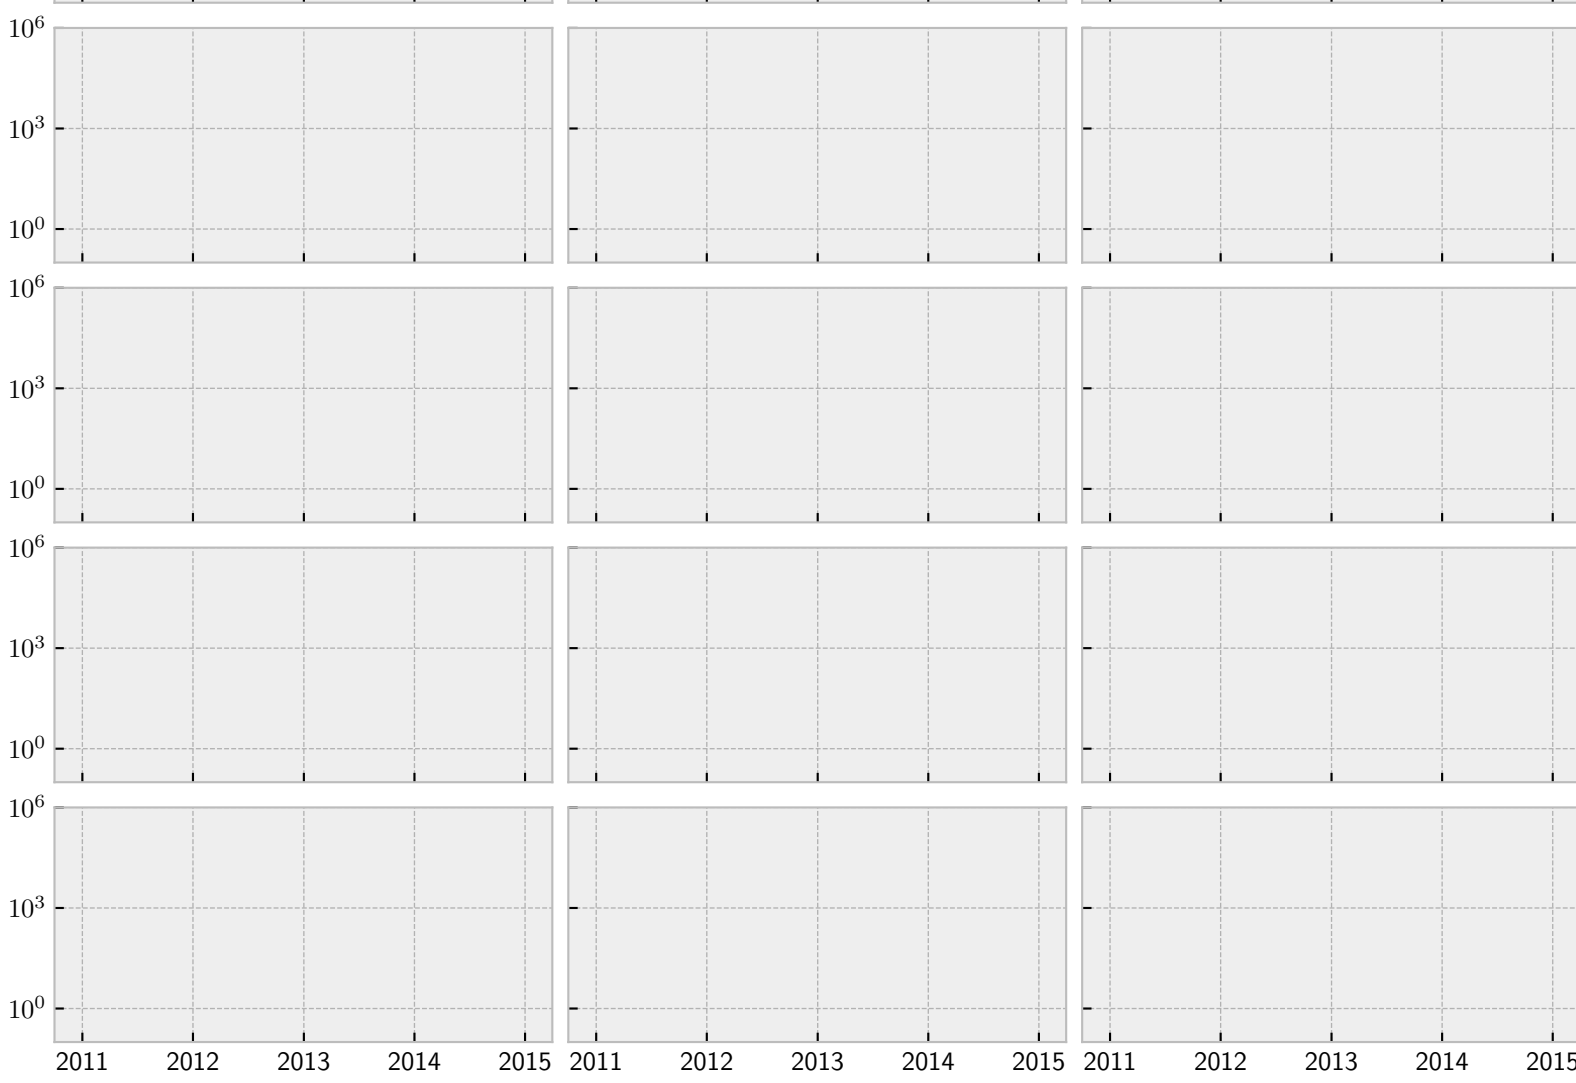

Supplement: supplementary_material [file attachment]

# iResNetBlock – Inversion Property

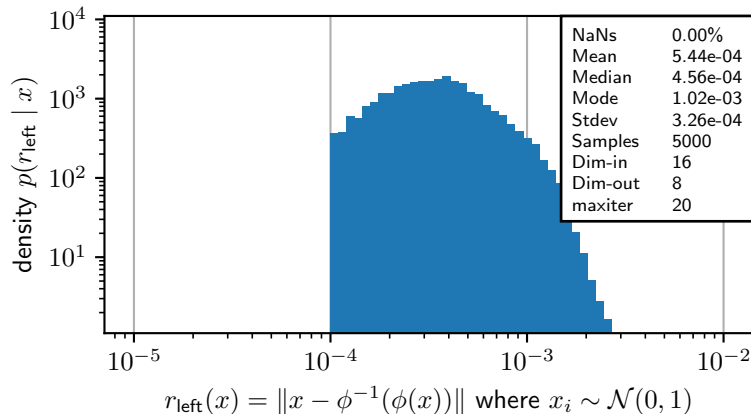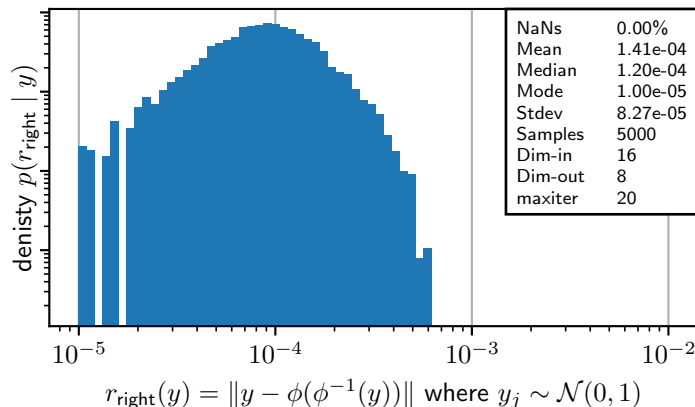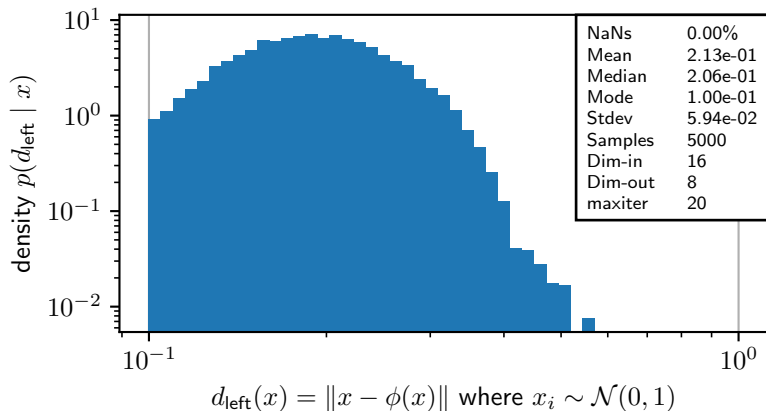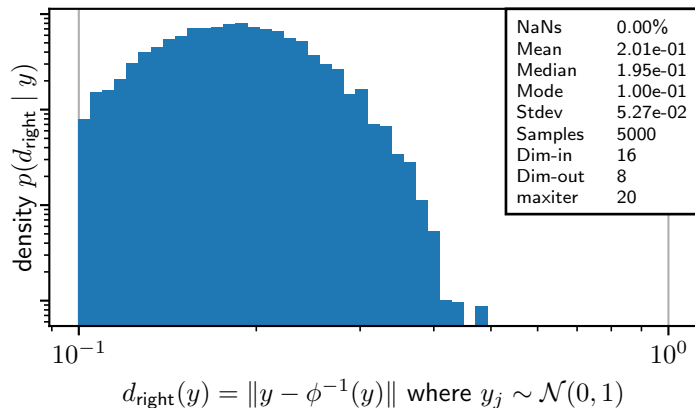

Supplement: supplementary_material [file attachment]















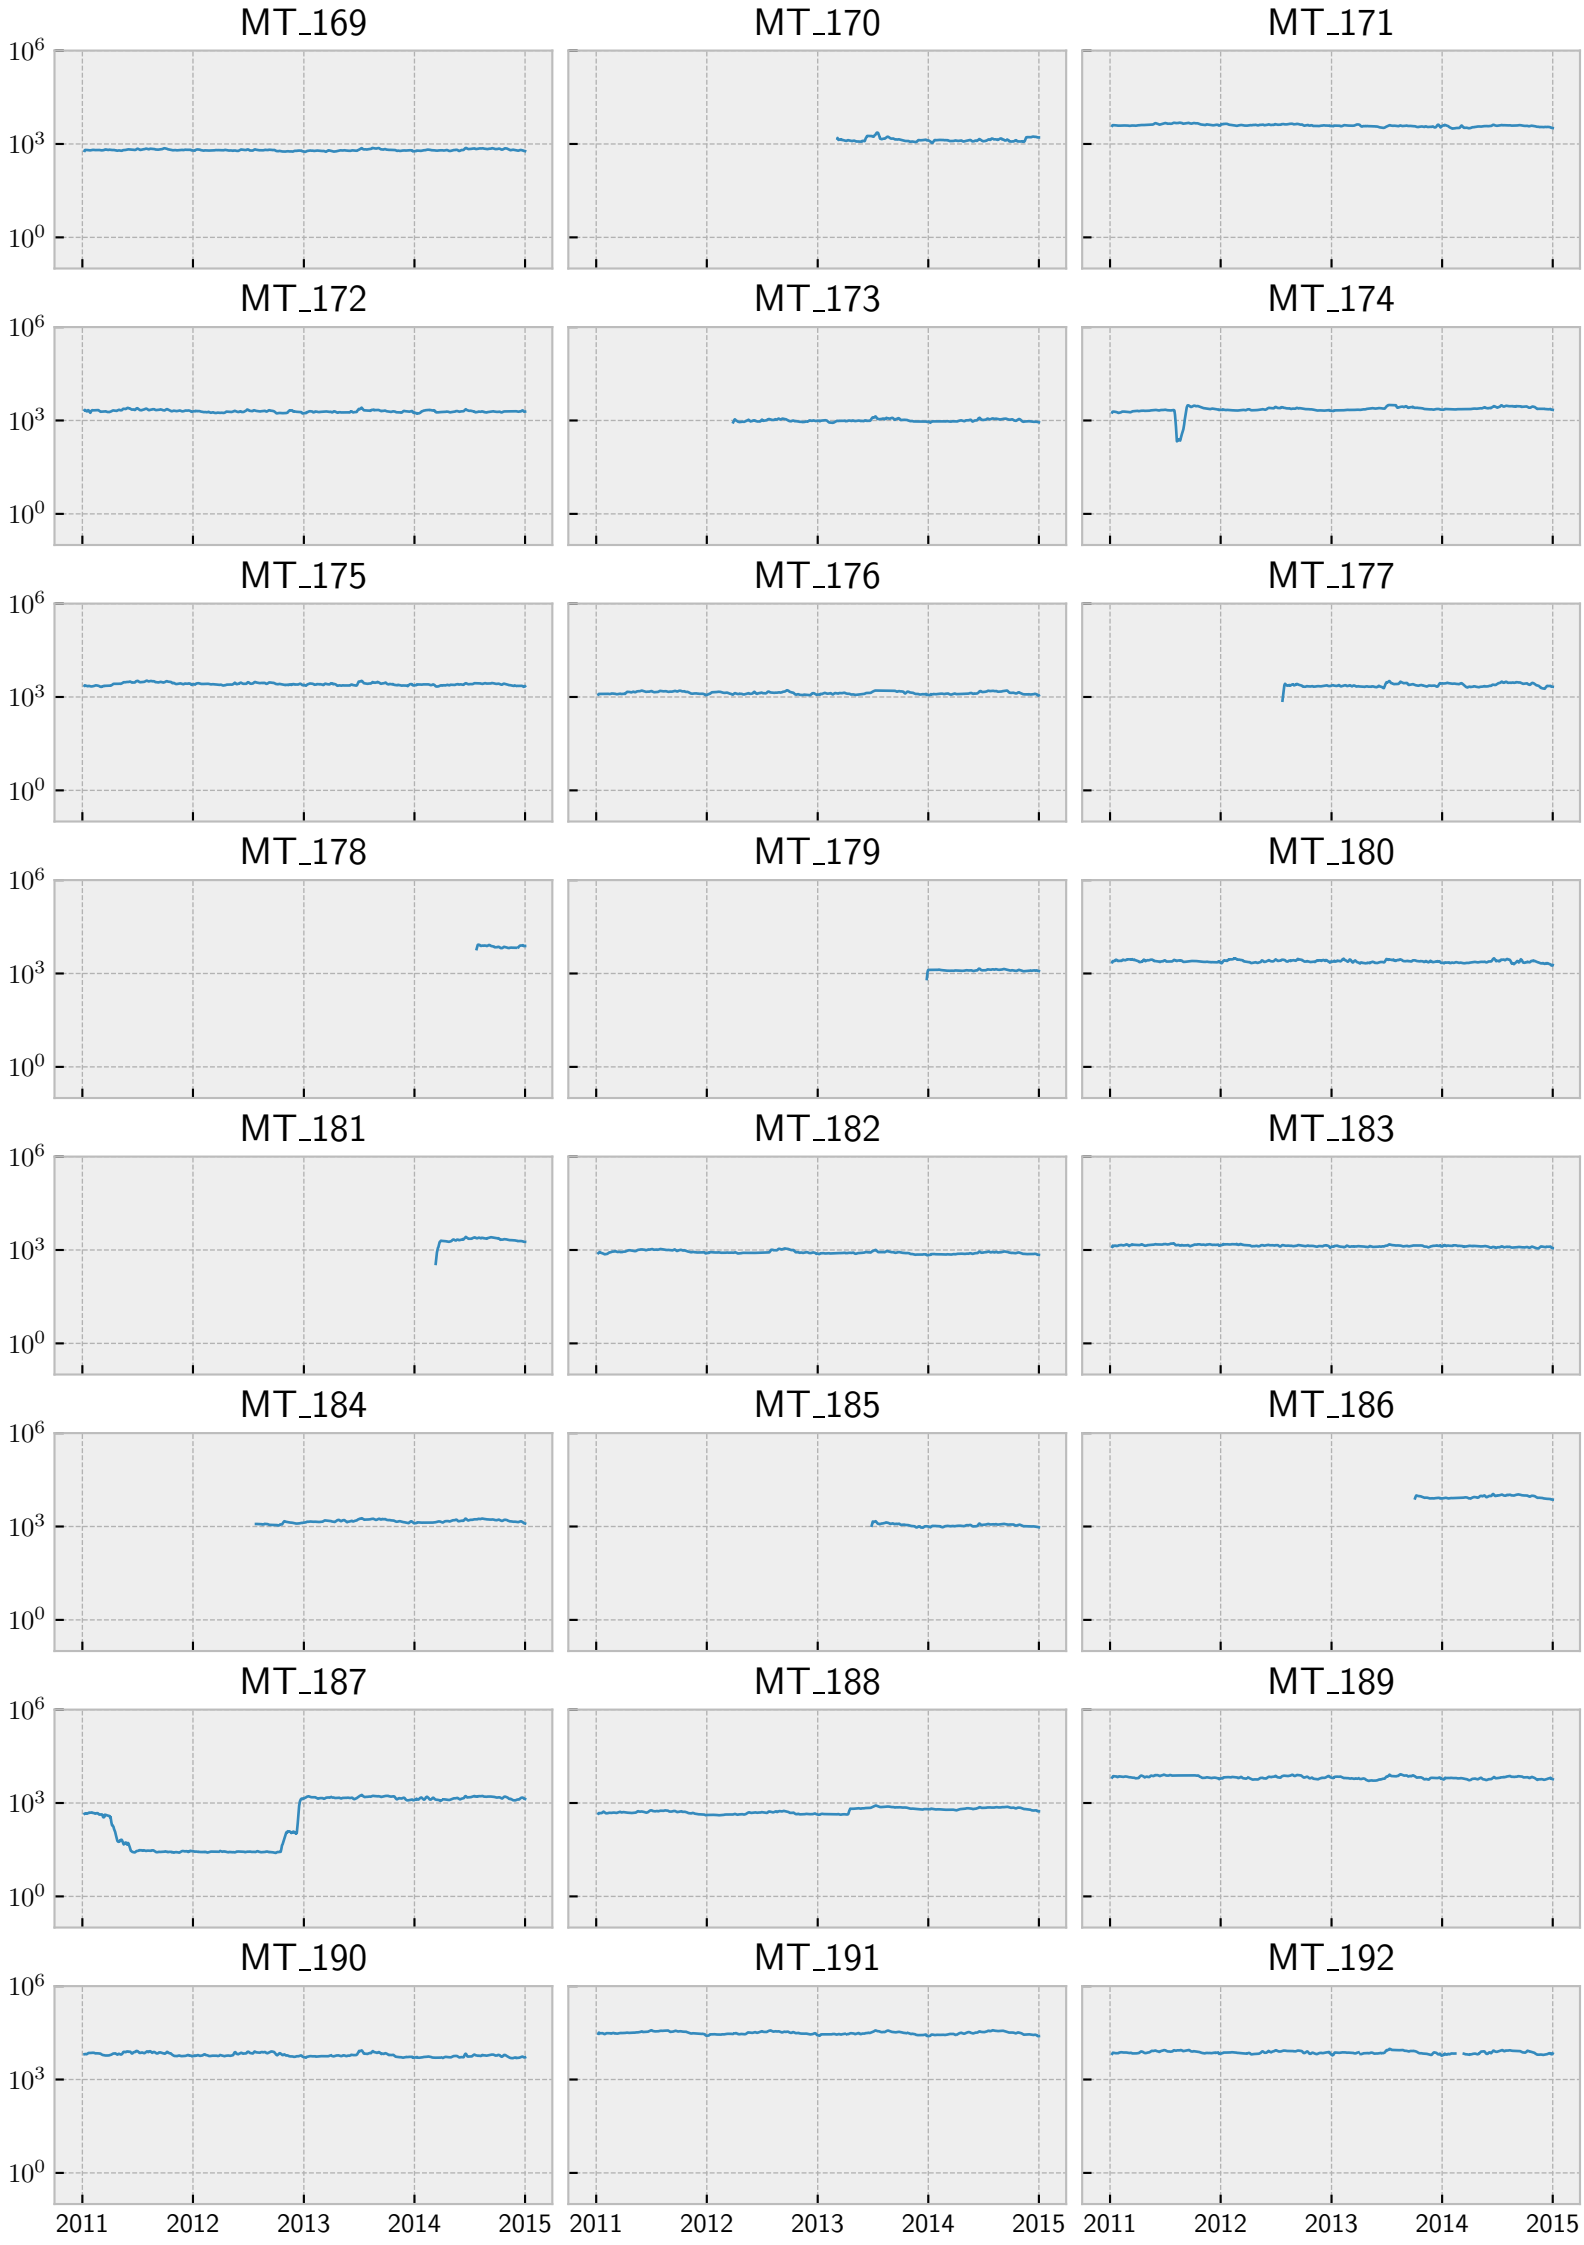

















MT\_361



MT\_362



MT\_363



MT\_364



MT\_365



MT\_366



MT\_367

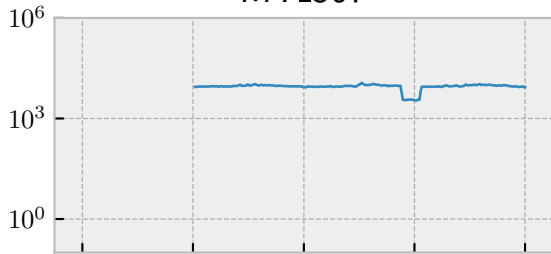

MT\_368

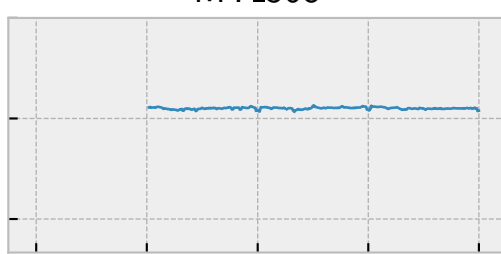

MT\_369

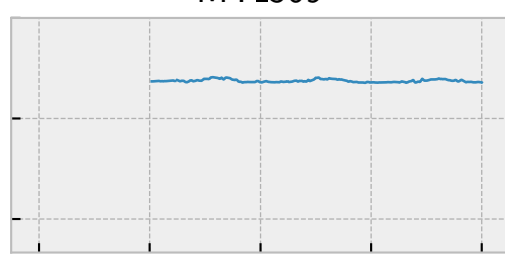

MT\_370

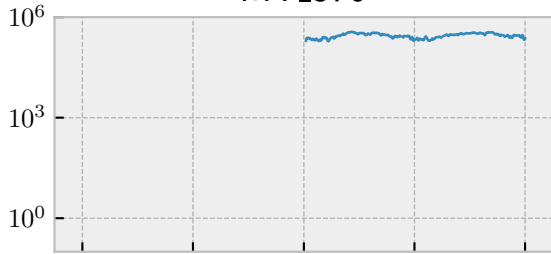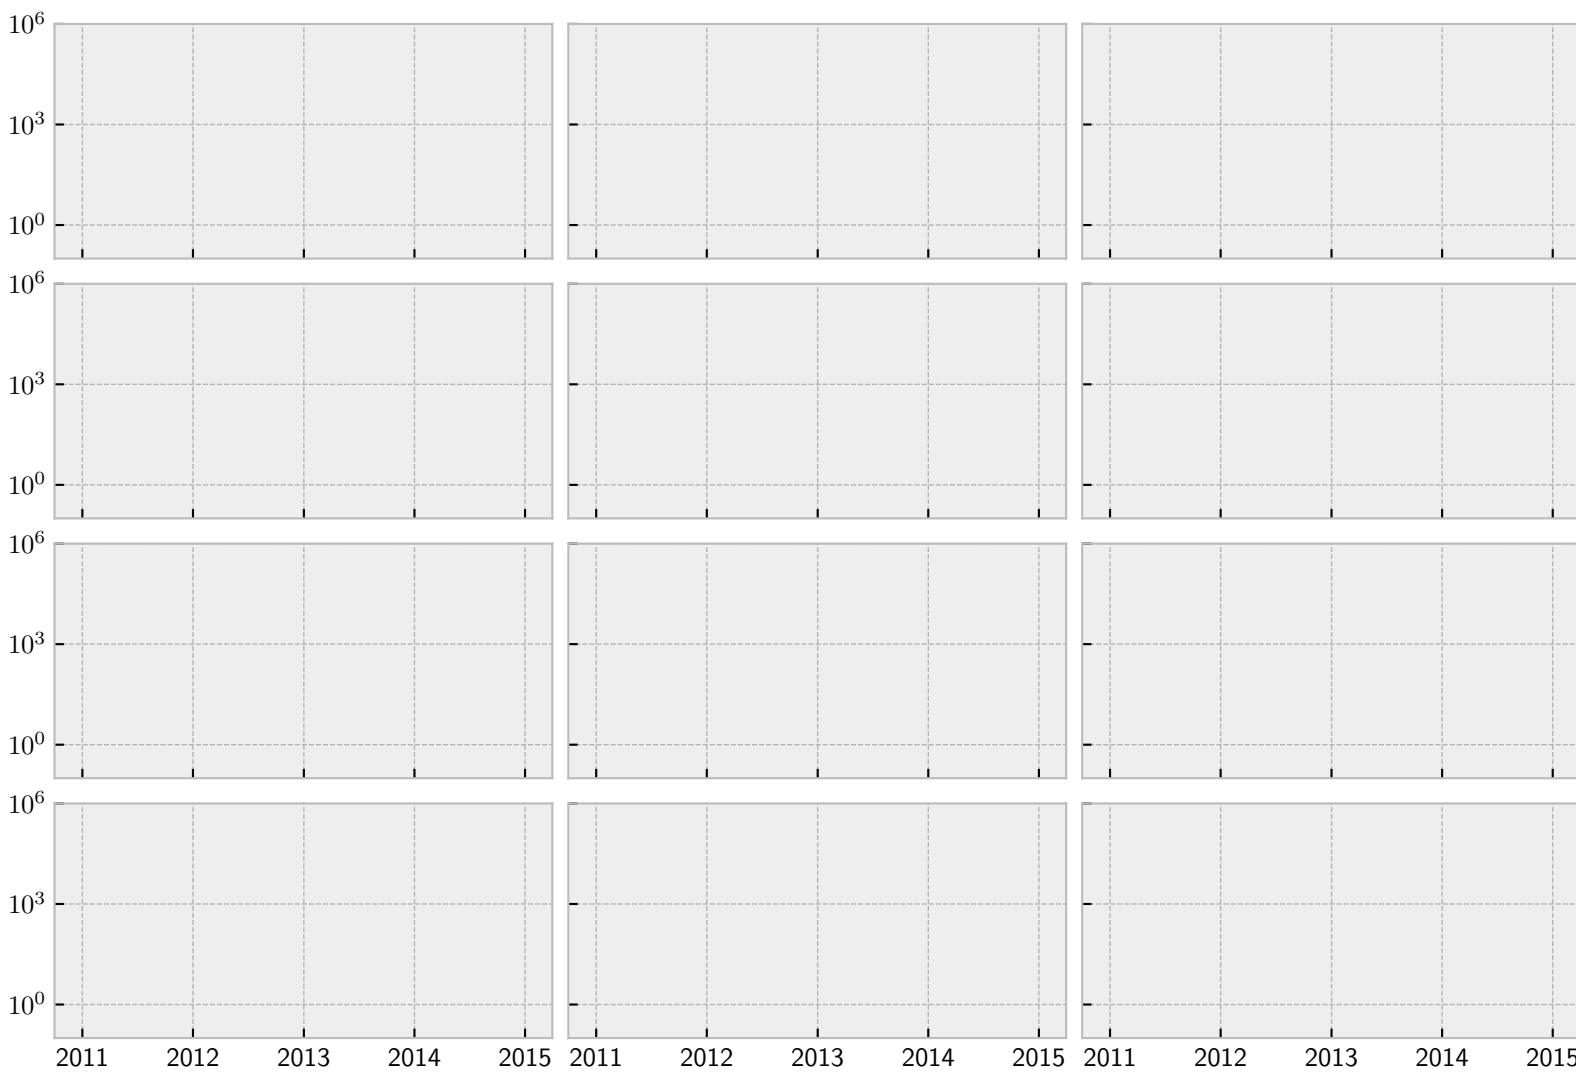

Supplement: supplementary_material [file attachment]

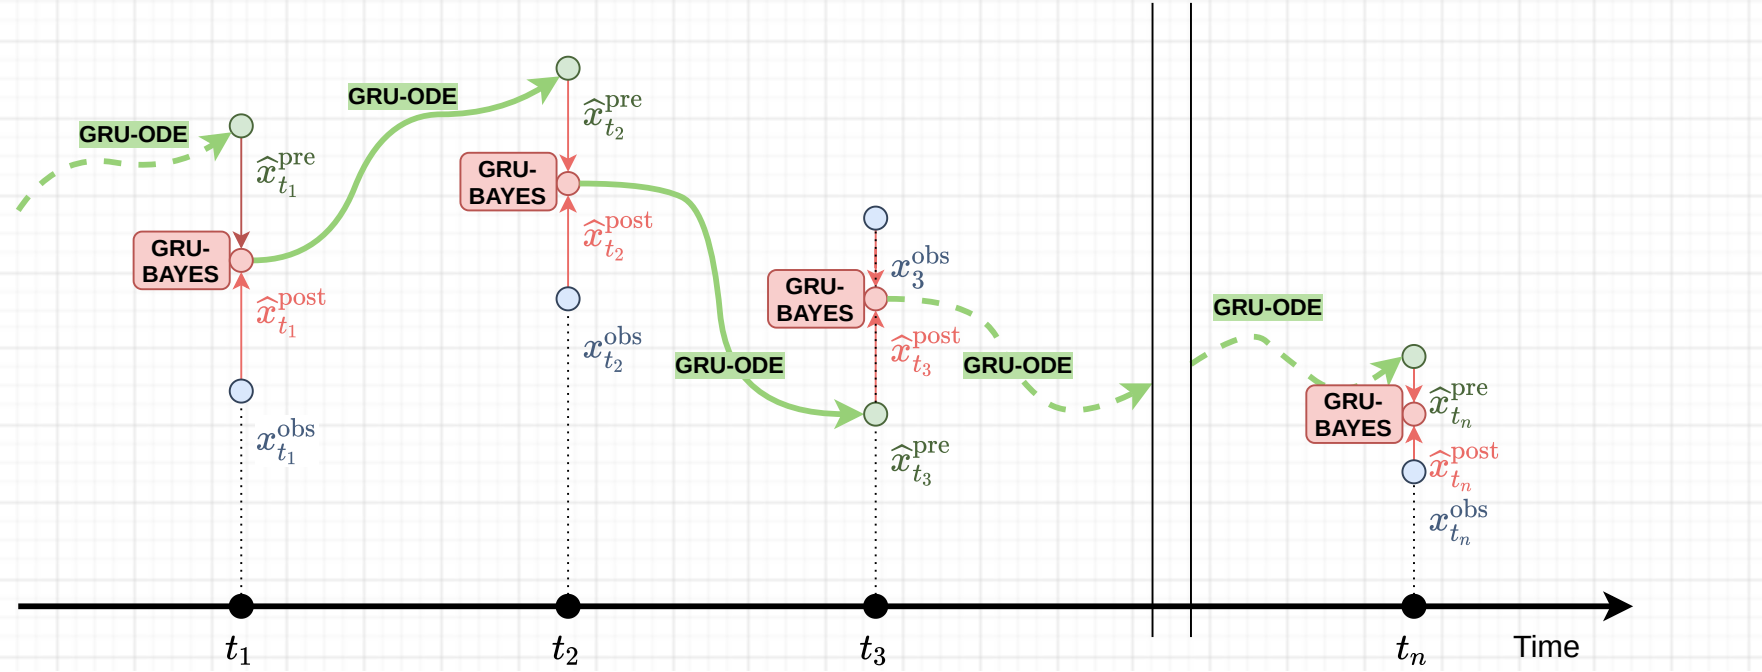

Supplement: supplementary_material [file attachment]

# LinearContraction – Scaling Factor Distribution

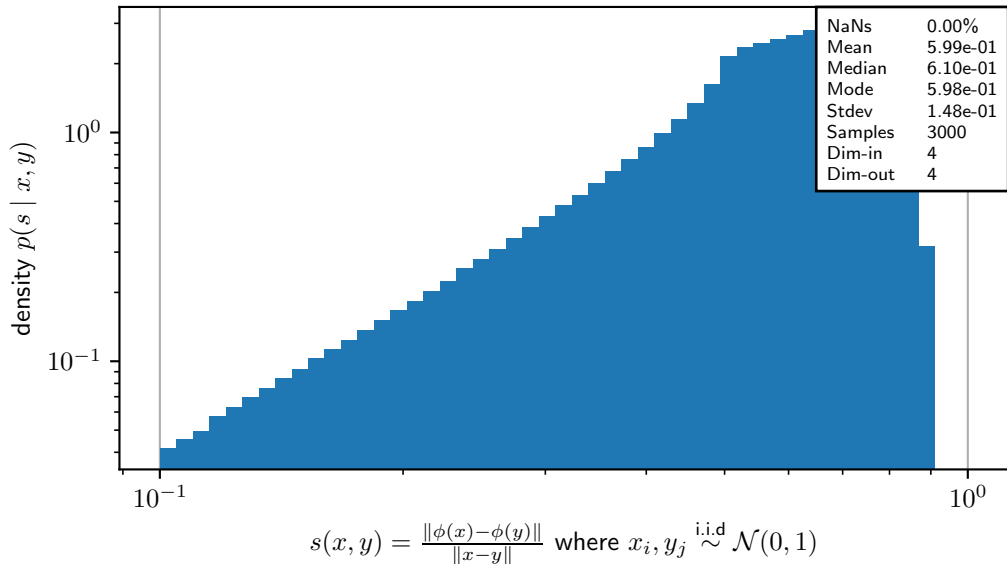

Supplement: supplementary_material [file attachment]

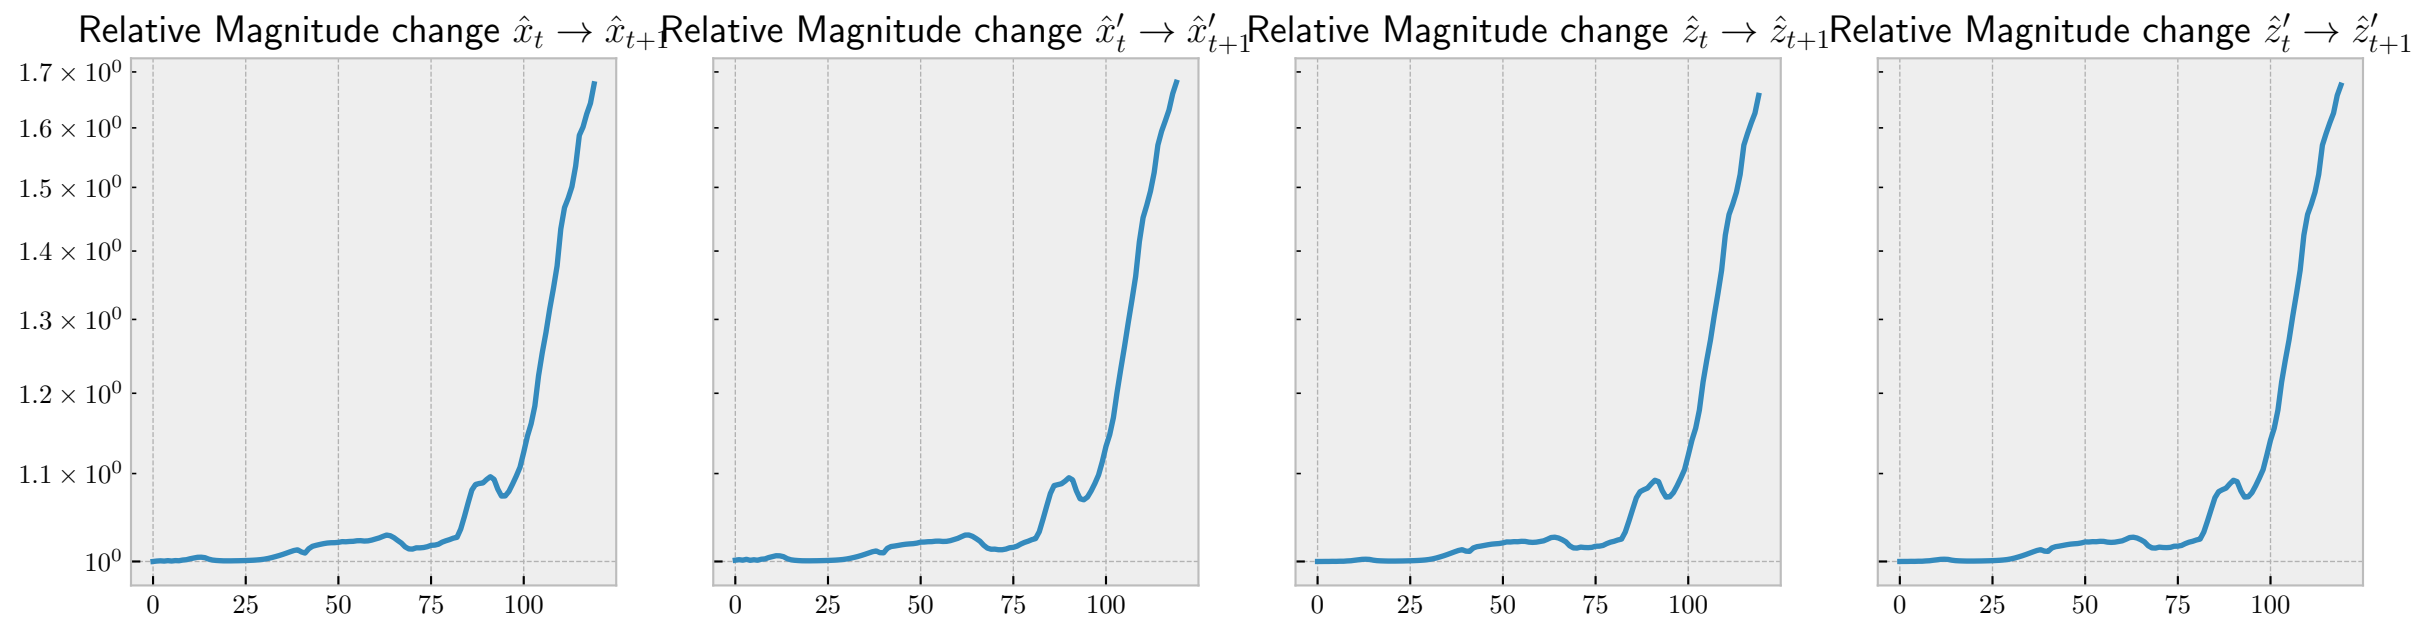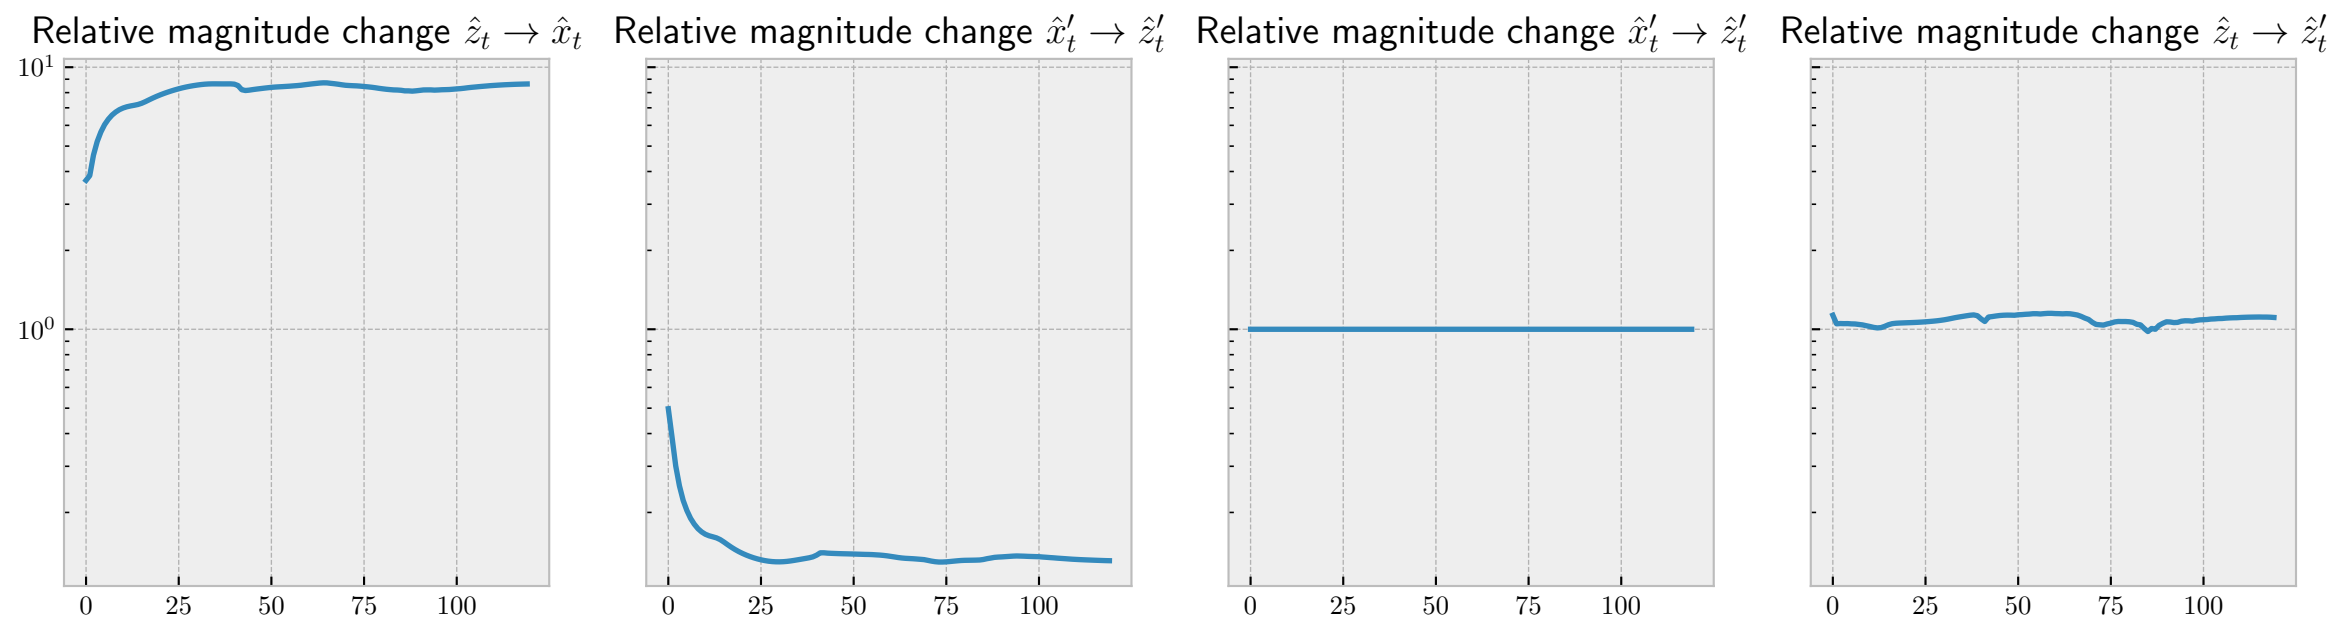

Supplement: supplementary_material [file attachment]

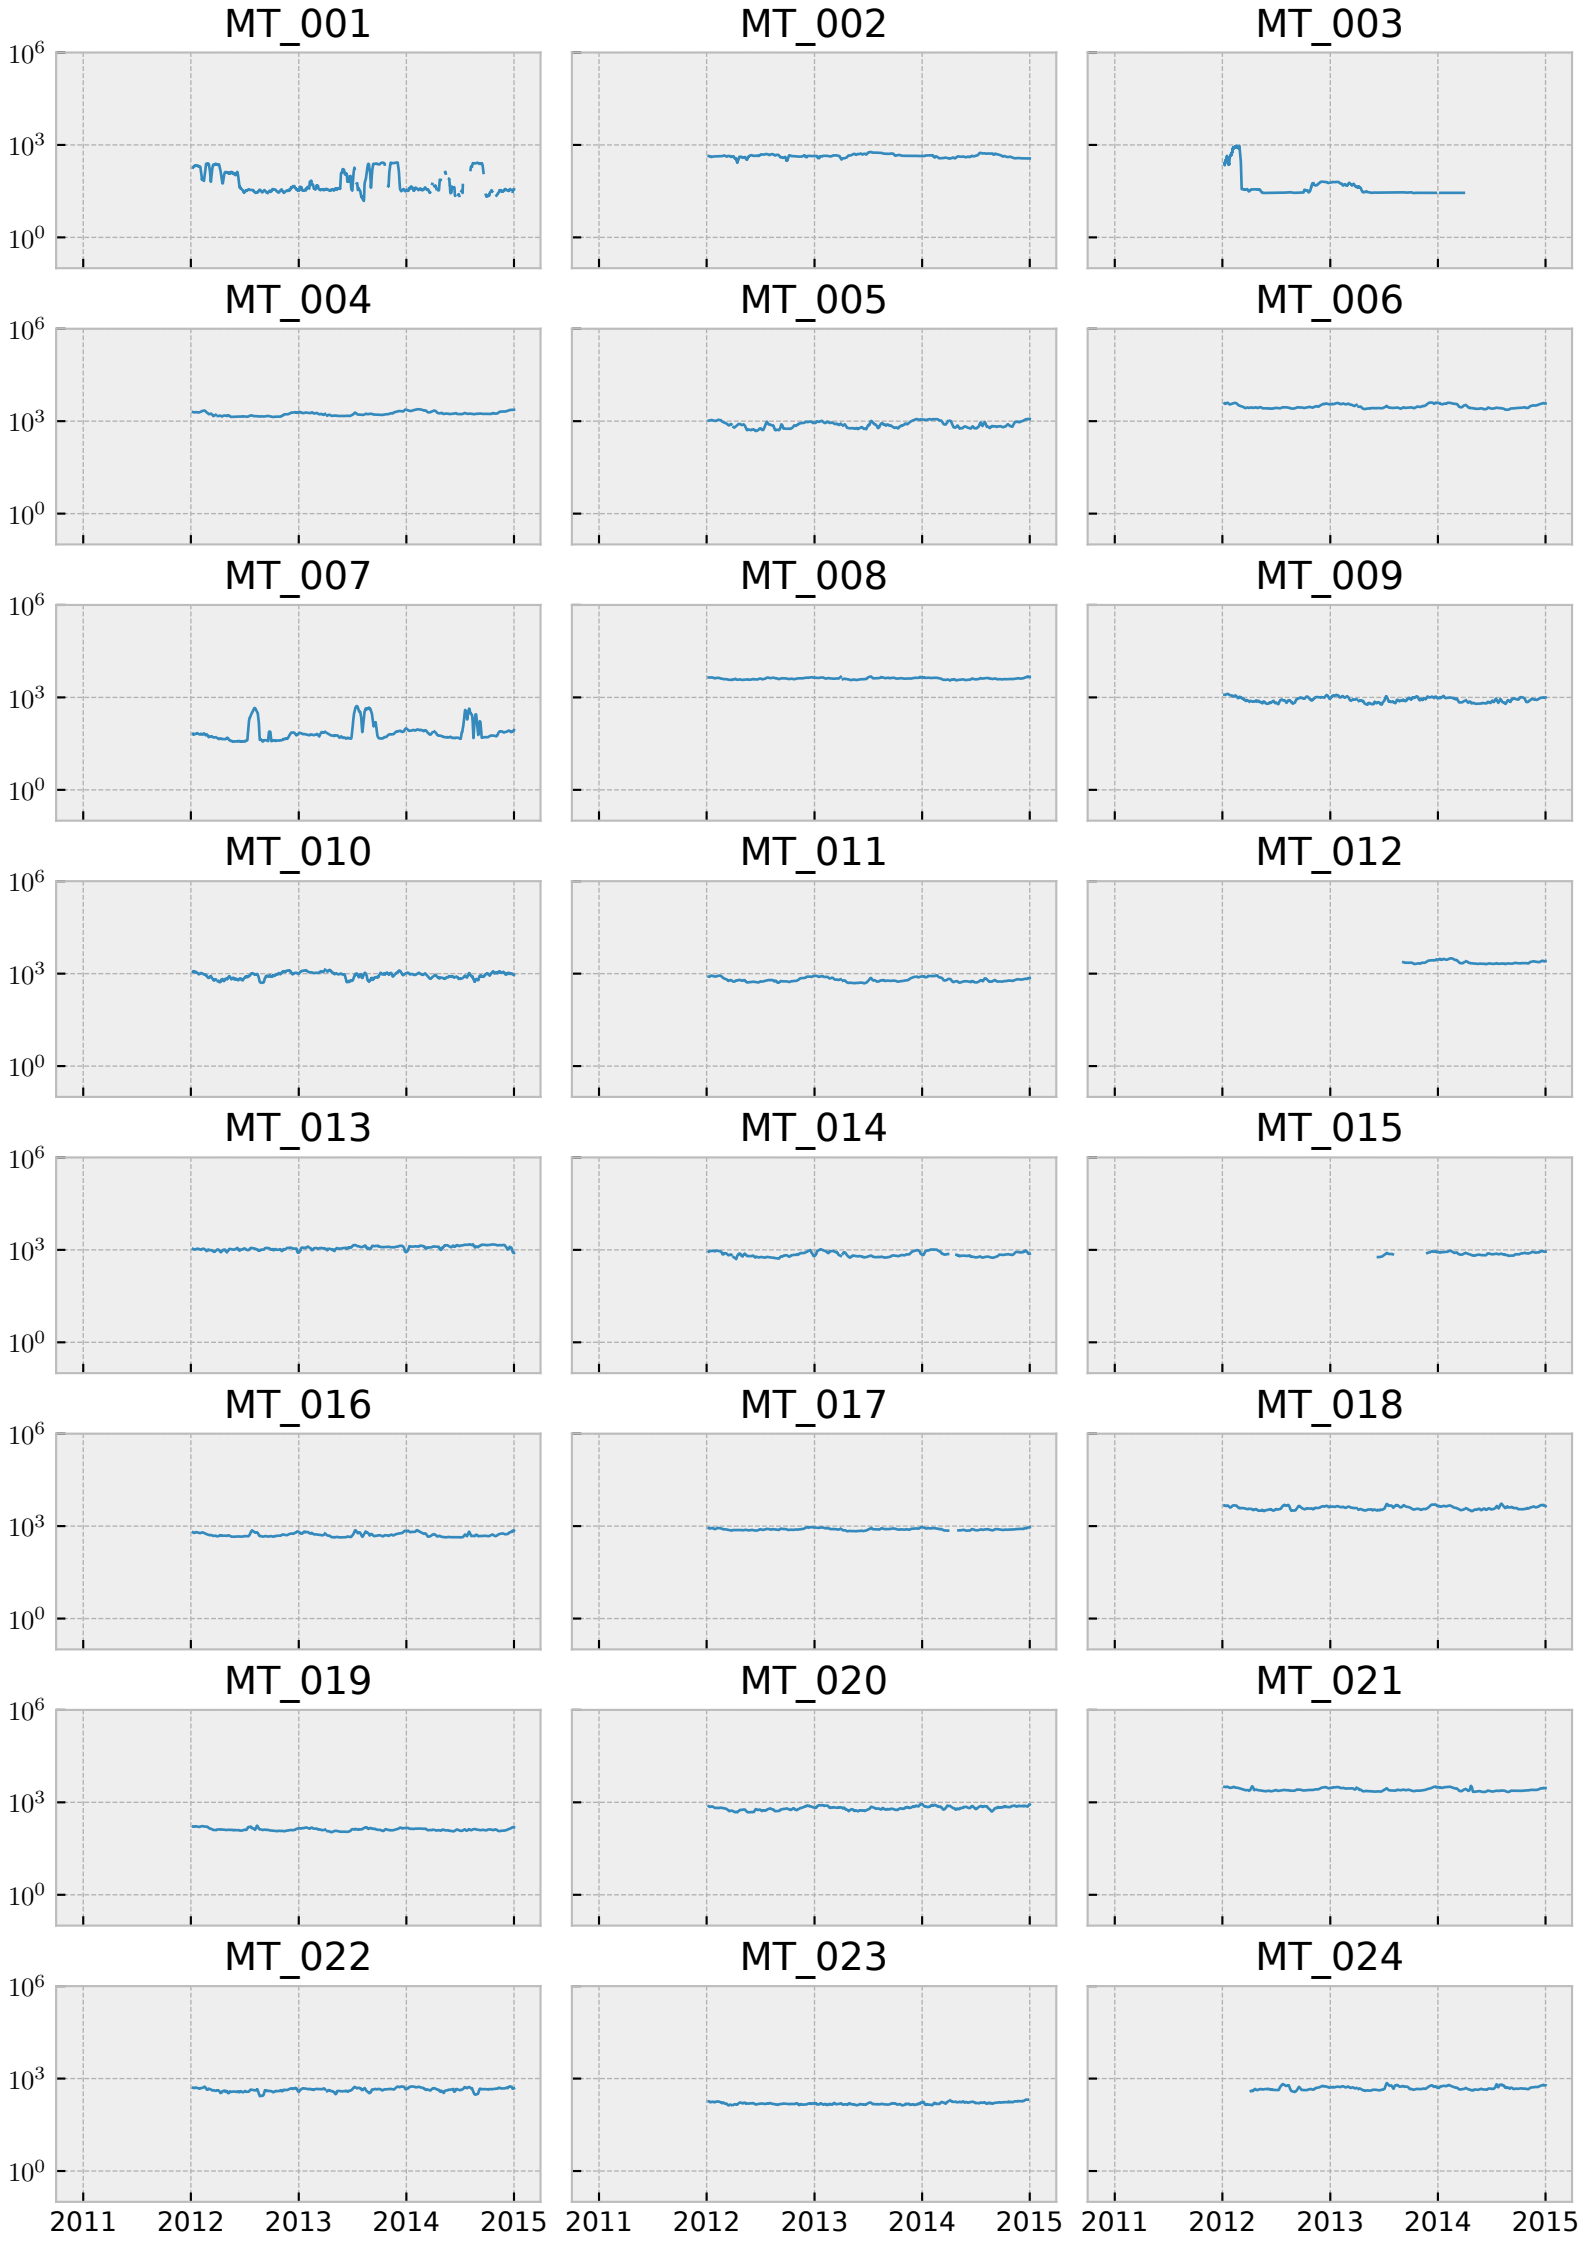

Supplement: supplementary_material [file attachment]

# Speed Results

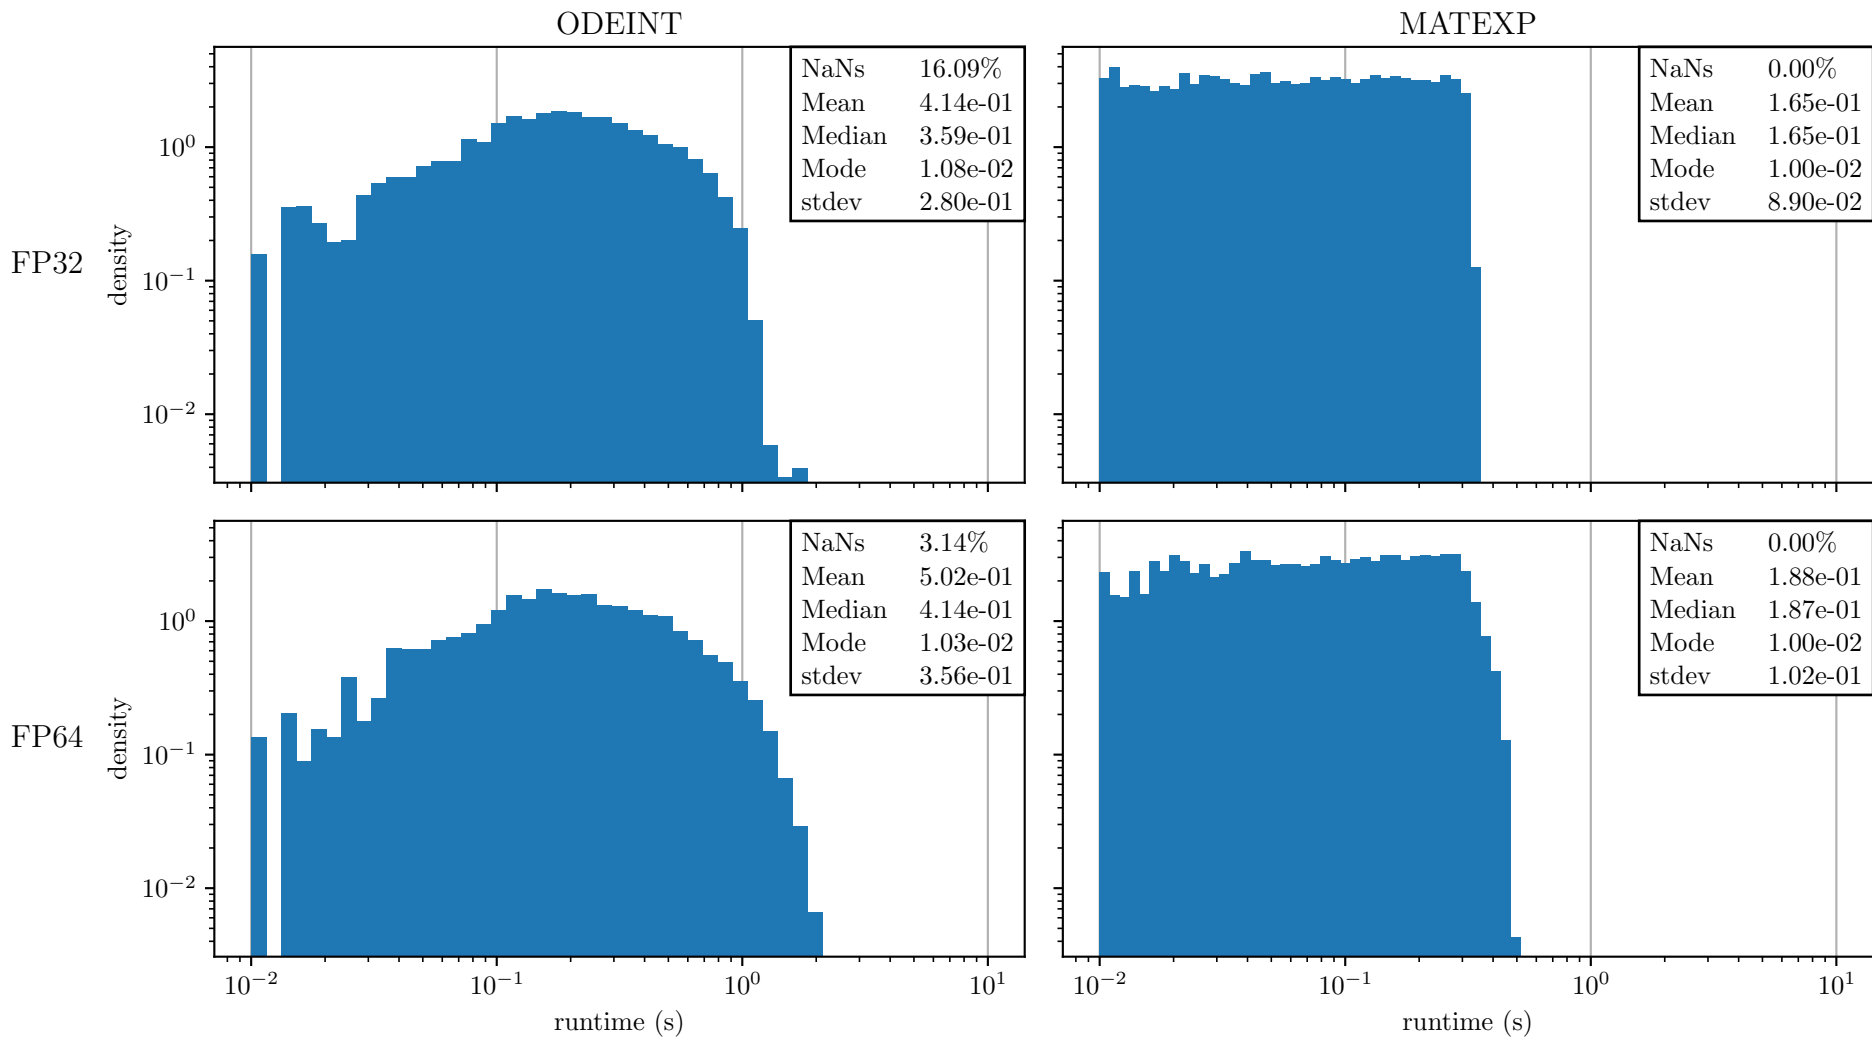

Supplement: supplementary_material [file attachment]
